# Supplementary material
Source: PubMed Central journal article supplement (PMC4443676)
Supplement: supp_btv038_TChu_Bioinf-20141577_Rev2_SUPPL.pdf [file supp_btv038_TChu_Bioinf-20141577_Rev2_SUPPL.pdf]

# The Assembly of miRNA-mRNA-protein Regulatory Networks Using High-throughput Expression Data

Tianjiao Chu, Jean-Francois Mouillet, Brian L. Hood, Thomas P. Conrads, and Yoel Sadovsky

## Supplementary Material

### Contents

- Supplemental text:
  - Additional methods (placentas and trophoblast cultures, expression microarrays for mRNA and miRNA, proteomic analysis using mass-spectrometry, and related references)
  - Data processing
  - Additional references
  - Auxiliary algorithms
  - Simulation data
- Nine supplemental figures
- Six supplemental tables

### Supplemental text

#### Additional methods

##### *Placentas and trophoblast culture*

This study was approved by the Institutional Review Board at the University of Pittsburgh. All placentas were procured from consenting healthy pregnant women who delivered a healthy newborn at term (37-40 weeks) after an uncomplicated pregnancy. Trophoblasts, the key functional cells in the placenta, were dispersed using a trypsin-deoxyribonuclease-dispase/Percoll method as described (Kliman, et al., 1986; Schaiff, et al., 2005). Trophoblasts were plated at a density of 300,000 cells/cm<sup>2</sup> in 6 well plates, and maintained in standard culture conditions (O<sub>2</sub>=20%) for 4 h (defined as time 0). At that point the plates were divided to those in continued standard culture conditions, or to culture in hypoxia (O<sub>2</sub>=0%), using a hermetically enclosed incubator (Thermo Electron, Marietta, OH) that provided the desired level of oxygen level (O<sub>2</sub>=0%: 5% CO<sub>2</sub>, 10% H<sub>2</sub>, and 85% N<sub>2</sub>). All media were pre-equilibrated to the gas mixture before addition to the culture plate, and refreshed every 24 h. Oxygen concentration was continuously monitored using a sensor connected to a data acquisition module (Scope; Data Translation, Marlboro, MA). Cells were harvested at 6 h, 12 h, 24 h, 48 h and 72 h, and processed for RNA arrays or proteomics, as described below. The experiment was repeated five times, but because of poor cell quality, trophoblasts were only analyzed from four replicates for a total of 44 time points (4 sets x 11 time points each).

##### *Expression microarrays for mRNA and miRNA*

RNA was purified from trophoblasts as we previously described (Oh, et al., 2011; Schaiff, et al., 2005) and quantified by absorbance at 260 nm using a Nanodrop UV-Vis spectrophotometer (Thermo Scientific) and by RNA 6000 Nano Assay Kit (Agilent Technologies, Santa Clara, CA) in an Agilent 2100 Bioanalyzer (Agilent). All RNA integrity number (RIN) values were in the range of 8.0 to 9.9 (minimum acceptable RIN =7). For mRNA labeling we used the Low Input Quick Amp Labeling Kit, One-Color (Agilent), and prepared the labeled RNA for hybridization on SurePrint G3 HMN GE 8x60K slides using the Gene Expression Hybridization Kit (both from Agilent). Slides were scanned using Agilent's SureScan Microarray Scanner System, and data extracted using Agilent's Feature Extraction Software (version 11.0.1.1). A similar procedure was used for miRNA arrays, but the hybridization was performed on Human miRNA V3 8x15K slides using the miRNA Complete Labeling and Hyb Kit (both from Agilent). The data are deposited in NCBI's Gene Expression Omnibus and are accessible through GEO Series accession number GSE60433 (<http://www.ncbi.nlm.nih.gov/geo/query/acc.cgi?acc=GSE60433>).

### *Proteomic analysis using mass-spectrometry*

Proteomic analysis was performed using three million primary trophoblasts per paradigm. The cells were sonicated to disrupt cell membranes, solubilized, and protein concentrations determined by the bicinchoninic assay (Pierce, Rockford, IL, USA). Thirty mg of each sample was resolved just into the stacking portion of a 1D-SDS-PAGE gel, excised, and digested in-gel with sequencing grade porcine trypsin (Promega, Madison, WI, USA). Peptides were extracted and analyzed with five recursive injections by liquid chromatography-tandem mass spectrometry on a linear ion trap mass spectrometer (LTQ, ThermoFischer Scientific, San Jose, CA, USA) essentially as described (Bateman, et al., 2010). Tandem mass spectra were searched against a combined UniProt human protein database from the European Bioinformatics Institute (Kersey, et al., 2005) using SEQUEST (Thermo) for peptide/protein identification. Results were further filtered using software developed locally to determine unique peptides and proteins. Differences in protein abundance between the samples were derived by spectral counting and peptides whose sequence mapped to multiple protein isoforms were grouped as per the principle of parsimony (Marengo, et al., 2010).

### **Data processing**

In the analyses of the miRNA/mRNA/protein expression data, we divided the samples into 11 exposure groups: Time 0, and either standard condition or hypoxia at 6 h, 12 h, 24 h, 48 h, and 72 h. Each exposure group contains 3 to 4 samples, except for the protein data, where no data were available for samples collected at 6 h.

The miRNA microarray data were log<sub>2</sub> transformed, normalized, and summarized using the Robust Multi-array Average procedure (Irizarry, et al., 2003), as implemented in the AgiMicroRna R package (Lopez-Romero, 2011). Summarized miRNA data were filtered to remove miRNAs with very low expression levels across all samples. The summarized miRNA data were filtered in two steps to remove miRNAs with very low expression across all samples. In step 1), a miRNA was removed if, for none of the 11 exposure groups, the miRNA was considered detected by the Agilent feature extractor in at least 2 samples in that group. In step 2), miRNAs in each sample were clustered into two clusters using the EM algorithm, representing unexpressed and expressed miRNAs respectively. A miRNA was removed if in none of the 11 exposure groups, the miRNA belonged to the expressed cluster in at least 2 samples in that group.

We assumed that the expression of miRNAs could be represented by linear mixed effect models, with exposure to standard or hypoxic conditions at various time points as a categorical fixed effect, and the placental origin of the samples as a random effect. We used the algorithm implemented in R package *maanova* (Kerr and Churchill, 2001) to identify miRNAs that were differentially expressed between standard or hypoxic conditions over the time course. The *maanova* package employs a shrinkage method to estimate the variance of each miRNA, and performs a permutation test on the F statistics to estimate p values. The p-values were adjusted by the Benjamini and Hochberg's method to control for the false discovery rate (Benjamini and Hochberg, 1995).

The mRNA data were log<sub>2</sub> transformed and normalized using the cyclic loess normalization algorithm, and filtered to remove mRNAs with very low expression. The mRNA data were analyzed following the same procedure as the differential expression analysis for the miRNA data.

The protein data, which are count data, were filtered to remove those proteins whose total counts over the 36 samples were less than 12, and analyzed using the generalized linear mixed effect models, with the standard or hypoxic conditions as the fixed effect, and the placenta origin as the random effect. Log likelihood ratio test was used to determine if a protein is differentially expressed, with p-values adjusted using the Benjamini and Hochberg's method.

Unsupervised machine learning algorithms were applied to the miRNA, mRNA, and protein data to explore their inherent relations. For unsupervised analysis, the protein data were smoothed by adding 1 to the count of each protein, normalized by the total count of proteins in each sample, and log<sub>2</sub> transformed. Differentially expressed miRNAs, mRNAs, and proteins were clustered using the k-means algorithm into five groups with distinct expression patterns over the culture conditions. Classical multi-dimensional scaling and hierarchical clustering were applied to all expressed miRNAs, mRNAs, and proteins.

## Additional references

- Bateman, NW, *et al.* (2010) Defining central themes in breast cancer biology by differential proteomics: conserved regulation of cell spreading and focal adhesion kinase. *J Proteome Res*, 9, 5311-5324.
- Benjamini, Y and Hochberg, Y. (1995) Controlling the false discovery rate: a practical and powerful approach to multiple testing. *J Roy Statist Soc Ser B (Methodological)* 57, 289-300.
- Irizarry, RA, *et al.* (2003) Exploration, normalization, and summaries of high density oligonucleotide array probe level data. *Biostatistics*, 4, 249-264.
- Kerr, MK and Churchill, GA. (2001) Statistical design and the analysis of gene expression microarray data. *Genet Res*, 77, 123-128.
- Kersey, P, *et al.* (2005) Integr8 and Genome Reviews: integrated views of complete genomes and proteomes. *Nucleic Acids Res*, 33, D297-302.
- Kliman, HJ, *et al.* (1986) Purification, characterization, and in vitro differentiation of cytotrophoblasts from human term placenta. *Endocrinology*, 118, 1567-1582.
- Lopez-Romero, P. (2011) Pre-processing and differential expression analysis of Agilent microRNA arrays using the AgiMicroRna Bioconductor library. *BMC Genomics*, 12, 64.
- Marengo, E, *et al.* (2010) The principle of exhaustiveness versus the principle of parsimony: a new approach for the identification of biomarkers from proteomic spot volume datasets based on principal component analysis. *Anal Bioanal Chem*, 397, 25-41.
- Oh, SY, *et al.* (2011) The timing and duration of hypoxia determine gene expression patterns in cultured human trophoblasts. *Placenta*, 32, 1004-1009.
- Schaiff, WT, *et al.* (2005) Peroxisome proliferator-activated receptor-gamma and retinoid X receptor signaling regulate fatty acid uptake by primary human placental trophoblasts. *J Clin Endocrinol Metab*, 90, 4267-4275.

## Auxiliary algorithms

The *Splitting algorithm for Markov Blanket with known direct effects* (SAMB-KDE), described below, was used in the first step of the MBSmRN algorithm to identify the Markov Blanket of a target mRNA, when the number of candidate regulators of the target mRNA far exceeded the sample size. In the first step, after filtering out variables independent of the target given the direct effects of the target, the remaining variables were divided into multiple subsets, and a Markov blanket search for the target variable was performed on each subset. The variables in the resulting Markov blankets from all subsets were combined. A further Markov blanket search on the combined set of variables yielded the Markov blanket of the target variable. Lemma 1 proves the correctness of the SAMB-KDE algorithm. Lemma 2 and Corollary 1 showed that the second step of the MBSmRN algorithm was correct. The time complexity of SAMB-KDE algorithm varies based on the different model selection methods. For example, assuming the use of stepwise model selection, and a linear model for the target molecule, the time complexity of SAMB-KDE algorithms will be  $O(np+ndm^3)$ , where  $n$  is sample size,  $p$  the number of variables,  $d$  the number of variables dependent with the target,  $m$  the number of variables in each of the split parts. The  $O(np)$  term is needed for identifying variables independent of the target, where the  $O(ndm^3)$  term is the cost of the second part of step 1. The cost of step 2 can be ignored if we assume that the size of the output from step 1 is  $O(m)$ .

The *general splitting algorithm for Markov Blanket* (SAMB-G) was used in the first step of the MBSNIG algorithm to identify the Markov Blanket of a target protein, when the number of candidate regulators of the target protein far exceeded the sample size. Like the SAMB-KDE algorithm, in the first step, after filtering out variables independent of the target, the remaining variables were divided into multiple subsets, and a Markov blanket search for the target variable was performed on each subset. The variables in the resulting Markov blankets from all subsets were combined, and a further Markov blanket search for the target variable was performed on this combined set of variables. The resulting set of variables, in combination with variables independent of the target given those variables, were subject to a Markov blanket search to yield the Markov blanket of the target variable. Lemma 3 showed that the SAMB-G algorithm was correct. Like the SAMB-KDE algorithm, the time complexity of SAMB-G algorithm varies based on the model selection method used. For example, assuming using stepwise model selection, and a generalized linear model for the target molecule, the time complexity of SAMB-G algorithm will be  $O(cnpm+cndm^2)$ , where  $n$  is sample size,  $p$  the number of variables,  $d$  the number of variables dependent with the target,  $m$  the number of variables in each of the split parts, and  $c$  the average number of iterations needed to fit a generalized linear model. The  $O(cnpm)$  term is the cost for step 3, assuming that the size of the output from step 2 is  $O(m)$ . Note that it dominates the cost of identifying variables independent of the target in step 1. The  $O(cndm^2)$  term is the cost of the second part of step 1. If we assume that the size of the output from step 1 is  $O(m)$ , the cost of step 2 can be ignored.

The *Partial Orientation of the Markov Blanket for a non-Gaussian variable* (POMB-NG) algorithm was used in the second step of the MBSNIG algorithm to determine, among the variables in the Markov Blanket of a target protein, which of them were direct regulators of proteins. In the first two steps, a heuristic bidirectional search was performed on the Markov blanket of the target variable to obtain a set of non-descendent variables of the target that contains all direct causes of the target. From this set of non-descendent variables, a Markov blanket search produced the set of direct causes of the target variable. Assuming that the data are generated from generalized linear models, using iteratively reweighted least square with conjugate gradient descent, it takes  $O(cnb)$  time to fit a model, where  $n$  is the sample size,  $b$  the number of variables in the Markov Blanket, and  $c$  the number of iterations needed. The complexity of the POMB-NG algorithm therefore is  $O(cnb^4)$ , as it needs to fit  $O(b^2)$  model in each step of the upward or downward search. Note that in our PHT data we observed that the number  $b$  was usually modest, often less than 10, and very rarely above 20.

*Splitting algorithm for Markov Blanket with known direct effects:*

Let  $V$  be the set of measured variables that is causal sufficient, i.e., for any two variables  $X_1, X_2 \in V$ , if  $X_3$  is a cause of both  $X_1$  and  $X_2$ , then  $X_3 \in V$ . Let  $X \in V$ , and  $Ch(X; V) \subseteq V$  be the set of direct effects of  $X$  (“Ch” stands for “children”). To identify  $MB(X; V)$ , the Markov blanket of  $X$  from  $V$ , the splitting algorithms has the following two steps:

Step 1. Let  $Ind(X; V | Ch(X; V))$  be the set of variables in  $V \setminus (Ch(X; V) \cup \{X\})$  independent of  $X$  conditional on  $Ch(X; V)$ . Divide  $V \setminus (Ch(X; V) \cup \{X\} \cup Ind(X; V | Ch(X; V)))$  into  $k$  disjoint subsets  $V'_1, \dots, V'_k$  such that  $V \setminus (Ch(X; V) \cup \{X\} \cup Ind(X; V | Ch(X; V))) = \cup_i V'_i$ .

For  $i = 1, \dots, k$ , identify  $MB(X; V'_i \cup Ch(X; V))$ , i.e., the Markov blanket of  $X$  from  $V'_i \cup Ch(X; V)$ , by identifying the optimal set of predictors of  $X$  in  $V'_i \cup Ch(X; V)$  using model selection method.

Step 2. Identify  $MB(X; \cup_i MB(X; V'_i \cup Ch(X; V)))$ , the Markov blanket of  $X$  from the union of the  $k$  Markov blankets  $\cup_i MB(X; V'_i \cup Ch(X; V))$ , by identifying the optimal set of predictors of  $X$  using model selection method. Return  $MB(X; V) = MB(X; \cup_i MB(X; V'_i \cup Ch(X; V)))$ .

*Lemma 1:*

Assuming Faithfulness and Causal Sufficiency, the splitting algorithm for Markov Blanket with known direct effects is correct.

*Proof:*

First, let us show that  $MB(X; V) \subseteq \cup_i MB(X; V'_i \cup Ch(X; V))$ . That is, the Markov blanket of  $X$  is a subset of the output from step 1 of the algorithm.

Let  $Pa(X; V)$  be the direct causes of  $X$  in  $V$ , and  $Sp(X; V)$  the direct causes of  $Ch(X; V)$  other than  $X$  itself in  $V$ . Clearly  $Pa(X; V) \subseteq V \setminus (\{X\} \cup Ind(X; V | Ch(X; V))) = \cup_i (V'_i \cup Ch(X; V))$ , and  $Sp(X; V) \subseteq V \setminus (\{X\} \cup Ind(X; V | Ch(X; V))) = \cup_i (V'_i \cup Ch(X; V))$ . Note that  $MB(X; V) = Pa(X; V) \cup Ch(X; V) \cup Sp(X; V)$ .

For  $i = 1, \dots, k$ , it is easy to see that:

- 1) For each variable  $Z$  in  $Pa(X; V) \cap (V'_i \cup Ch(X; V))$ , we have:  $\forall Y \subseteq (V'_i \cup Ch(X; V)) \setminus \{Z\}$ ,  $X$  and  $Z$  are dependent conditional on  $Y$ . Therefore  $Pa(X; V) \cap (V'_i \cup Ch(X; V)) \subseteq MB(X; V'_i \cup Ch(X; V))$ .
- 2) For each variable  $Z$  in  $Ch(X; V)$ , we have:  $\forall Y \subseteq (V'_i \cup Ch(X; V)) \setminus \{Z\}$ ,  $X$  and  $Z$  are dependent conditional on  $Y$ . Therefore  $Ch(X; V) \subseteq MB(X; V'_i \cup Ch(X; V))$ .
- 3) For each variable  $Z$  in  $Sp(X; V) \cap (V'_i \cup Ch(X; V))$ , we have:  $\forall Y \subseteq (V'_i \cup Ch(X; V)) \setminus \{Z\}$ ,  $X$  and  $Z$  are dependent conditional on  $Y \cup Ch(X; V)$ . Therefore  $Sp(X; V) \cap (V'_i \cup Ch(X; V)) \subseteq MB(X; V'_i \cup Ch(X; V))$ .

Therefore, we have  $Pa(X; V) \subseteq \cup_i MB(X; V'_i \cup Ch(X; V))$ ,  $Ch(X; V) \subseteq \cup_i MB(X; V'_i \cup Ch(X; V))$ , and  $Sp(X; V) \subseteq \cup_i MB(X; V'_i \cup Ch(X; V))$ , hence  $MB(X; V) \subseteq \cup_i MB(X; V'_i \cup Ch(X; V))$ .

Second, let us show that  $MB(X; \mathcal{V}) = MB(X; \cup_i MB(X; \mathcal{V}'_i \cup Ch(X; \mathcal{V})))$ .

It is easy to see that  $MB(X; \cup_i MB(X; \mathcal{V}'_i \cup Ch(X; \mathcal{V}))) \subseteq MB(X; \mathcal{V})$ . For each variable  $Z$  in  $\cup_i MB(X; \mathcal{V}'_i \cup Ch(X; \mathcal{V})) \setminus MB(X; \mathcal{V})$ , we have  $Z \in \mathcal{V}$ , hence is independent of  $X$  conditional on  $MB(X; \mathcal{V})$ .

To show that  $MB(X; \mathcal{V}) \subseteq MB(X; \cup_i MB(X; \mathcal{V}'_i \cup Ch(X; \mathcal{V})))$ , we notice that:

- 1)  $Pa(X; \mathcal{V}) \subseteq \cup_i MB(X; \mathcal{V}'_i \cup Ch(X; \mathcal{V}))$ . Moreover, for each variable  $Z$  in  $Pa(X; \mathcal{V})$ , we have:  $\forall Y \subseteq \cup_i MB(X; \mathcal{V}'_i \cup Ch(X; \mathcal{V})) \setminus \{Z\}$ ,  $X$  and  $Z$  are dependent conditional on  $Y$ . Therefore  $Pa(X; \mathcal{V}) \subseteq MB(X; \cup_i MB(X; \mathcal{V}'_i \cup Ch(X; \mathcal{V})))$ .
- 2)  $Ch(X; \mathcal{V}) \subseteq \cup_i MB(X; \mathcal{V}'_i \cup Ch(X; \mathcal{V}))$ . Moreover, for each variable  $Z$  in  $Ch(X; \mathcal{V})$ , we have:  $\forall Y \subseteq \cup_i MB(X; \mathcal{V}'_i \cup Ch(X; \mathcal{V})) \setminus \{Z\}$ ,  $X$  and  $Z$  are dependent conditional on  $Y$ . Therefore  $Ch(X; \mathcal{V}) \subseteq MB(X; \cup_i MB(X; \mathcal{V}'_i \cup Ch(X; \mathcal{V})))$ .
- 3)  $Sp(X; \mathcal{V}) \subseteq \cup_i MB(X; \mathcal{V}'_i \cup Ch(X; \mathcal{V}))$ . Moreover, for each variable  $Z$  in  $Sp(X; \mathcal{V})$ , assume  $Z \notin MB(X; \cup_i MB(X; \mathcal{V}'_i \cup Ch(X; \mathcal{V})))$ . Then given that  $Ch(X; \mathcal{V}) \subseteq MB(X; \cup_i MB(X; \mathcal{V}'_i \cup Ch(X; \mathcal{V})))$ ,  $X$  and  $Z$  are dependent conditional on  $MB(X; \cup_i MB(X; \mathcal{V}'_i \cup Ch(X; \mathcal{V})))$ . Contradiction. Therefore  $Sp(X; \mathcal{V}) \subseteq MB(X; \cup_i MB(X; \mathcal{V}'_i \cup Ch(X; \mathcal{V})))$ .

Therefore, we have  $MB(X; \mathcal{V}) \subseteq MB(X; \cup_i MB(X; \mathcal{V}'_i \cup Ch(X; \mathcal{V})))$ .

*Lemma 2:*

Let  $\mathcal{V}$  be the set of measured variables that is causal sufficient,  $Pa(X; \mathcal{V})$  be the set of direct causes of  $X \in \mathcal{V}$ , and  $\mathcal{N}$  a set of non-descendants of  $X$  such that  $Pa(X; \mathcal{V}) \subseteq \mathcal{N}$ . Then the Markov blanket of  $X$  over  $\mathcal{N}$  is the set of direct causes of  $X$ , that is,  $Pa(X) = MB(X; \mathcal{N})$ .

*Proof:*

It is easy to show that  $Pa(X; \mathcal{V}) \subseteq MB(X; \mathcal{N})$ , given that  $Pa(X; \mathcal{V}) \subseteq \mathcal{N}$ , and that  $\forall Y \in Pa(X; \mathcal{V}), \forall Z \subseteq \mathcal{V} \setminus \{X, Y\}$ ,  $X$  and  $Y$  are dependent conditional on  $Z$ .

To show that  $MB(X; \mathcal{N}) \subseteq Pa(X; \mathcal{V})$ , we notice that, given its direct causes  $Pa(X; \mathcal{V})$ ,  $X$  is independent of all its non-descendants. Now  $\forall Z \in MB(X; \mathcal{N}) \setminus Pa(X; \mathcal{V})$ ,  $Z$  is a non-descendant of  $X$ , hence  $X$  and  $Z$  are independent conditional on  $Pa(X; \mathcal{V})$ . This implies that  $MB(X; \mathcal{N}) \subseteq Pa(X; \mathcal{V})$ .

*Corollary 1:*

Let  $\mathcal{V}$  be the set of measured variables that is causal sufficient, and  $MB(X; \mathcal{V})$  is the Markov blanket for  $X \in \mathcal{V}$ . If  $X$  has only one direct effect  $C$ , then the Markov blanket of  $X$  over  $MB(X; \mathcal{V}) \setminus \{C\}$  is the set of direct causes of  $X$ , that is,  $Pa(X) = MB(X; MB(X; \mathcal{V}) \setminus \{C\})$ .

*Proof:*

We note that the Markov blanket  $MB(X; \mathcal{V})$  of  $X$  is the union of the set of all direct causes of  $X$ , the set of all direct effects of  $X$ , and, excluding  $X$ , the set of all direct causes of the direct effects of  $X$ . Because  $X$  has only one direct effect  $C$ , a direct cause of  $C$  cannot be a descendant of  $C$ , hence cannot be a descendant of  $X$ . Therefore,  $MB(X; \mathcal{V}) \setminus \{C\}$  consists of only non-descendants of  $X$ . Given that  $MB(X; \mathcal{V})$ , hence  $MB(X; \mathcal{V}) \setminus \{C\}$ , include all direct causes of  $X$ , by Lemma 2, we have  $Pa(X) = MB(X; MB(X; \mathcal{V}) \setminus \{C\})$ .

*General Splitting algorithm for Markov Blanket:*

Let  $\mathcal{V}$  be the set of measured variables that is causal sufficient, i.e., for any two variables  $X_1, X_2 \in \mathcal{V}$ , if  $X_3$  is a cause of both  $X_1$  and  $X_2$ , then  $X_3 \in \mathcal{V}$ . Let  $X \in \mathcal{V}$ , and  $Ch(X; \mathcal{V}) \subseteq \mathcal{V}$  be the set of direct effects of  $X$  in  $\mathcal{V}$ . To identify  $MB(X; \mathcal{V})$ , the Markov blanket of  $X$  from  $\mathcal{V}$ , the general splitting algorithms has the following three steps:

- Step 1. Let  $Ind(X; \mathcal{V})$  be the set of variables in  $\mathcal{V}$  independent of  $X$ . Divide  $\mathcal{V} \setminus Ind(X; \mathcal{V})$  into  $k$  disjoint subsets  $\mathcal{V}'_1, \dots, \mathcal{V}'_k$  such that  $\mathcal{V} \setminus Ind(X; \mathcal{V}) = \cup_i \mathcal{V}'_i$ . For  $i = 1, \dots, k$ , identify  $MB(X; \mathcal{V}'_i)$ , i.e., the Markov blanket of  $X$  from  $\mathcal{V}'_i$ , by identifying the optimal set of predictors of  $X$  in  $\mathcal{V}'_i$  using model selection method.

Step 2. Identify  $M' = MB(X; \cup_i MB(X; V'_i))$ , the Markov blanket of  $X$  from the union of the  $k$  Markov blankets  $\cup_i MB(X; V'_i)$  by identifying the optimal set of predictors of  $X$  in  $\cup_i MB(X; V'_i)$  using model selection method.

Step 3. Let  $Dep(X; V | M')$  be the set of variables in  $V$  dependent of  $X$  given  $M'$ . That is,  $\forall Z \in V \setminus M'$ ,  $X$  and  $Z$  are dependent given  $M'$ . Identify  $MB(X; M' \cup Dep(X; V | M'))$  by identifying the optimal set of predictors of  $X$  in  $M' \cup Dep(X; V | M')$  using model selection method. Return  $MB(X, V) = MB(X; M' \cup Dep(X; V | M'))$ .

*Lemma 3:*

Assuming Faithfulness and Causal Sufficiency,  $MB(X, V) = MB(X; M' \cup Dep(X; V | M'))$ . That is, the general splitting algorithm for Markov Blanket is correct.

Proof:

Let  $Pa(X; V)$  be the direct causes of  $X$  in  $V$ ,  $Ch(X; V)$  the direct effects of  $X$  in  $V$ , and  $Sp(X; V)$  the direct causes of  $Ch(X; V)$  other than  $X$  itself in  $V$ . Note that  $MB(X, V) = Pa(X; V) \cup Ch(X; V) \cup Sp(X; V)$ .

First, following the same argument as in the first part of the proof for Lemma 1, it is easy to see that  $Pa(X; V) \subseteq V \setminus Ind(X; V)$ , hence  $Pa(X; V) \subseteq \cup_i MB(X; V_i)$ , therefore  $Pa(X; V) \subseteq MB(X; \cup_i MB(X; V_i)) = M'$ . Similarly, we can show that  $Ch(X; V) \subseteq M'$ .

Next, we note that  $\forall Z \in Sp(X; V) \setminus M'$ ,  $X$  and  $Z$  are dependent given  $M'$ . Thus,  $Sp(X; V) \subseteq M' \cup Dep(X; V | M')$ . It then follows that  $MB(X; V) \subseteq M' \cup Dep(X; V | M')$ , hence  $MB(X; V) \subseteq MB(X; M' \cup Dep(X; V | M'))$ .

It is easy to see that  $MB(X; M' \cup Dep(X; V | M')) \subseteq MB(X; V)$ . For each variable  $Z$  in  $(M' \cup Dep(X; V | M')) \setminus MB(X; V)$ , we have  $Z \in V$ , hence is independent of  $X$  conditional on  $MB(X; V)$ .

#### Partial Orientation of the Markov Blanket for a non-Gaussian variable (POMB-NG)

First, let us introduce some notations. Let  $\mathbf{X} = \langle X_1, \dots, X_k \rangle$  and  $\mathbf{Y} = \langle Y_1, \dots, Y_m \rangle$  be ordered sets of variables (or tuples), we define the following operations on ordered sets:

$$\begin{aligned} \langle \mathbf{X}, Y_i \rangle &= \langle X_1, \dots, X_k, Y_i \rangle \\ \langle Y_b, \mathbf{X} \rangle &= \langle Y_b, X_1, \dots, X_k \rangle \\ \mathbf{X} \setminus \langle X_i \rangle &= \langle X_1, \dots, X_{i-1}, X_{i+1}, \dots, X_k \rangle \\ \langle \mathbf{X}, \mathbf{Y} \rangle &= \langle X_1, \dots, X_k, Y_1, \dots, Y_m \rangle \end{aligned}$$

Without causing confusion, we will some time use the same symbol refer to both a set and an ordered set with same set of elements.

Let  $X \sim \mathbf{Y}$  represent a regression model where  $X$  is the dependent variable and  $\mathbf{Y}$  the set of independent variables. Define  $LL_R(X \sim \mathbf{Y})$  as the log likelihood of the (generalized) linear regression model  $X \sim \mathbf{Y}$  fitted using maximum likelihood method. The regression model could be a Poisson regression model when  $X$  is count data. Moreover, if some independent variable  $Y_i \in \mathbf{Y}$  is count data, it will be replaced by its smoothed logarithm  $\log(Y_i + 1)$  in the regression model for the dependent variable  $X$ . Let  $\mathbf{X} = \langle X_1, \dots, X_k \rangle$  be an ordered set,  $\mathbf{X}_0 = \emptyset$ , and  $\mathbf{X}_i = \{X_1, \dots, X_i\}$  for  $i = 1, \dots, k$  be regular sets. Define  $LL_R(\mathbf{X} \sim \mathbf{Y}) = \sum_i LL_R(X_i \sim \mathbf{X}_{i-1} \cup \mathbf{Y})$ . Note that  $LL_R(\mathbf{X}) = \sum_i LL_R(X_i \sim \mathbf{X}_{i-1})$  when  $\mathbf{Y} = \emptyset$ .

Now let  $V$  be the set of measured variables that is causal sufficient,  $X \in V$ , and  $M_X = MB(X; V) \subseteq V$  be the Markov blanket of  $X$  in  $V$ . Let  $D_X \subseteq M_X$  be the set of descendent variables of  $X$  in  $M_X$ , that is, variables in  $D_X$  are either direct or indirect effects of  $X$ . Let  $N_X = M_X \setminus D_X$  be the set of non-descendent variables of  $X$  in  $M_X$ . Assume  $X$  is count data with a Poisson distribution conditional on its direct causes,  $N_X$  has a jointly multivariate normal distribution, and  $D_X$  has a jointly multivariate normal distribution conditional on  $N_X$  and  $X$ . Given  $X$  and  $M_X$ , the goal

of the POMB-NG algorithm is to use regression methods to identify the sets of descendent variables and the set of non-descendent variables of  $X$  in  $\mathbf{M}_X$ , and most importantly, the set of direct causes of  $X$ .

*Step 1. Upward search:*

1.1 Arbitrarily order the variables in  $\mathbf{M}_X$ . Initialize ordered sets  $\mathbf{N} \leftarrow \emptyset$ ,  $\mathbf{D} \leftarrow \mathbf{M}_X$ , and score  $s \leftarrow LL_R(\langle \mathbf{M}_X, X \rangle)$

1.2 While  $\mathbf{D} \neq \emptyset$ :

$D' = \text{ArgMax} [LL_R(\langle \mathbf{D} \setminus \langle D_i \rangle, X, D_i, \mathbf{N} \rangle), D_i]$ . That is,  $\forall D_i \in \mathbf{D}$ ,

$LL_R(\langle \mathbf{D} \setminus \langle D_i \rangle, X, D_i, \mathbf{N} \rangle) \leq LL_R(\langle \mathbf{D} \setminus \langle D' \rangle, X, D', \mathbf{N} \rangle)$ .

If  $LL_R(\langle \mathbf{D} \setminus \langle D' \rangle, X, D', \mathbf{N} \rangle) > s$ :

$s \leftarrow LL_R(\langle \mathbf{D} \setminus \langle D' \rangle, X, D', \mathbf{N} \rangle)$

$\mathbf{N} \leftarrow \langle D', \mathbf{N} \rangle$ ,  $\mathbf{D} \leftarrow \mathbf{D} \setminus \langle D' \rangle$ ,

Else, stop the upward search.

*Step 2. Downward search:*

2.1 Initialize  $\mathbf{N}$ ,  $\mathbf{D}$ , and  $s$  to the values returned by the upward search

2.2 While  $\mathbf{N} \neq \emptyset$ :

$N' = \text{ArgMax} [LL_R(\langle \mathbf{D}, N_i, X, \mathbf{N} \setminus \langle N_i \rangle \rangle), N_i]$ . That is,  $\forall N_i \in \mathbf{N}$ ,

$LL_R(\langle \mathbf{D}, N_i, X, \mathbf{N} \setminus \langle N_i \rangle \rangle) \leq LL_R(\langle \mathbf{D}, N', X, \mathbf{N} \setminus \langle N' \rangle \rangle)$

If  $LL_R(\langle \mathbf{D}, N', X, \mathbf{N} \setminus \langle N' \rangle \rangle) > s$ :

$s \leftarrow LL_R(\langle \mathbf{D}, N', X, \mathbf{N} \setminus \langle N' \rangle \rangle)$

$\mathbf{N} \leftarrow \mathbf{N} \setminus \langle N' \rangle$ ,  $\mathbf{D} \leftarrow \langle \mathbf{D}, N' \rangle$

Else, stop the downward search.

*Step 3. Identify the direct causes of  $X$ .*

3.1 Initialize  $\mathbf{N}$  to the value returned by the downward search.

3.2  $\mathbf{P} \leftarrow MB(X, \mathbf{N})$

$\mathbf{D} \leftarrow \text{Dep}(X; \mathbf{M}_X | \mathbf{P})$ , the set of variables in  $\mathbf{M}_X$  dependent of  $X$  given  $\mathbf{P}$ .

$\mathbf{N} \leftarrow \mathbf{M}_X \setminus \mathbf{D}$ .

3.3 Return  $\mathbf{P}$  as the set of direct causes of  $X$ ,  $\mathbf{D}$  as the set of descendent variables of  $X$  in  $\mathbf{M}_X$ ,  $\mathbf{N}$  as the set of non-descendent variables of  $X$  in  $\mathbf{M}_X$ .

*Comments:*

Given a variable  $X$  and its Markov blanket  $\mathbf{M}_X$ , let  $\mathbf{D}$  and  $\mathbf{N}$  be any two disjoint sets of variables such that  $\mathbf{M}_X = \mathbf{D} \cup \mathbf{N}$ . Let variables in  $\mathbf{D}$  and  $\mathbf{N}$  be ordered arbitrarily as  $\langle D_1, \dots, D_p \rangle$  and  $\langle N_1, \dots, N_q \rangle$ ,  $\mathbf{D}_0 = \emptyset$ ,  $\mathbf{D}_i = \{D_1, \dots, D_i\}$ ,  $\mathbf{N}_0 = \emptyset$ , and  $\mathbf{N}_i = \{N_1, \dots, N_i\}$ . The joint log likelihood of  $\mathbf{M}_X \cup \{X\}$  can be decomposed as:

$$\begin{aligned} LL(\mathbf{D} \cup \{X\} \cup \mathbf{N}) &= LL(\mathbf{D} | \{X\} \cup \mathbf{N}) + LL(X | \mathbf{N}) + LL(\mathbf{N}) \\ &= \sum_i LL(D_i | \{X\} \cup \mathbf{D}_{i-1}) + LL(X | \mathbf{N}) + \sum_j LL(N_j | \mathbf{N}_{j-1}). \end{aligned}$$

If  $\mathbf{M}_X \cup \{X\}$  jointly have a multivariate normal distribution, then each component of the joint log likelihood can be estimated by maximum likelihood estimation of the corresponding linear regression model, e.g.,  $LL(D_i | \{X\} \cup \mathbf{D}_{i-1})$  estimated by  $LL_R(D_i \sim \{X\} \cup \mathbf{D}_{i-1})$ . However, when  $X$  is integer valued and generated according to a generalized linear model like Equation (2), unless  $\mathbf{N}$  contains all the direct causes and none of the descendants of  $X$ ,  $LL_R(\langle \mathbf{D}, X, \mathbf{N} \rangle)$  is not longer maximum likelihood estimation of  $LL(\mathbf{D} \cup \{X\} \cup \mathbf{N})$ , because conditional on  $\mathbf{N}$ ,  $X$  is not Poisson distributed with the log of mean expressed as a linear function of  $\mathbf{N}$ .

The first two steps of the POMB-NG algorithm search through a set of systems of regression models for variables in  $\mathbf{M}_X \cup \{X\}$ , where the systems all have the same number of parameters and only differ from each other on the

ordering of the variables in  $\mathbf{M}_X \cup \{X\}$ . The ordered set  $\mathbf{N}$  identified at the end of step 2 is not unique. First, the ordering of variables in  $\mathbf{N}$  is not important, as long as  $\mathbf{N}$  consists of only non-descendent variables of  $X$ , i.e.,  $\mathbf{N} \subseteq N_X$ , where  $N_X$  is the set of non-descendent variables of  $X$  in  $\mathbf{M}_X$ . This is because, by the assumption that  $N_X$  has a multivariate normal distribution, the score of the system of regression models is independent of the ordering of variables in  $\mathbf{N}$ . Moreover,  $\mathbf{N}$  does not have to contain all non-descendent variables. For example, if  $Y \in N_X$  is an exogenous variable that is neither a direct nor an indirect cause of  $X$ , then the score for the system of regression models with  $\mathbf{N} = N_X \setminus \{Y\}$  is the same as the score for the true system of regression models:

$$LL_R(\langle \mathbf{D}_X, Y, X, N_X \setminus \{Y\} \rangle) = LL_R(\langle \mathbf{D}_X, X, N_X \rangle)$$

However, as discussed earlier, the ordered set  $\mathbf{N}$  would contain all the direct causes and none of the descendants of  $X$ , therefore ensure the correctness of the step 3 of the POMG-NG algorithm. In particular, by Lemma 2, we note that  $\mathbf{P} = MB(X, \mathbf{N})$  returned by step 3.2 is indeed the set of direct causes of  $X$ .

It should also be noted that the non-Gaussian assumption of  $X$  is not only sufficient but also necessary for the identification of the direct causes of  $X$ . For example, consider a DAG  $G_1: Y \rightarrow X \rightarrow Z$ , where the variable  $X$  has one direct cause  $Y$  and one direct effect  $Z$ . If  $X, Y$ , and  $Z$  jointly have a multivariate normal distribution, then the joint distribution of  $\{X, Y, Z\}$  is consistent with not only  $G_1$ , but also other two Markov equivalent DAGs  $G_2: Y \leftarrow X \rightarrow Z$ , where both  $Y$  and  $Z$  are direct effects of  $X$ , and  $G_3: Y \leftarrow X \leftarrow Z$ , where  $Z$  is a direct cause of  $X$ , and  $X$  is a direct cause of  $Y$ .

### Simulation data

Four simulated miRNA/mRNA/protein regulatory networks, each consisting of 40 miRNAs, 80 mRNAs and 80 proteins that are encoded by the mRNAs, were generated based on equations [1] and [2]. In each simulated network, there were a total of 30 exogenous miRNAs and mRNAs, which had no direct regulator in the simulated network. The protein product of an exogenous mRNA had only the mRNA as its direct regulator. Each endogenous miRNAs/mRNAs was assigned randomly 3 to 5 miRNAs and/or proteins as direct regulators. The protein product of an endogenous mRNA was also randomly assigned, in addition to its mRNA transcript, 3 to 5 miRNAs and/or proteins as direct regulators. The absolute values of the regulators coefficients in equations [1] and [2] were restricted to the interval [0.4,1). The coefficient  $a_i$  in equation [2], representing the effect of an mRNA transcript on its protein product, was always positive.

When applying the causal learning algorithms to the simulation data, we chose only mRNA/protein pair that satisfied the following two conditions: 1) the mRNA could not be exogenous; and 2) the protein must regulate at least one miRNA/mRNA/protein. This is because we believe that in real data, each miRNA or mRNA will have at least one direct regulator, and each protein will regulate at least one miRNA/mRNA/protein.

The MBSmRN and MBSNIG algorithms were implemented in R. For this simulation, we chose the stepwise (generalized) linear regression, based on AIC score corrected for finite sample size (Hurvich and Tsai, 1989), as the model selection method for the SAMB-KDE and SAMB-G routines of the MBSmRN and MBSNIG algorithms. The Lasso algorithm was based on the R package *glmnet*, and the MMHC algorithm was based on R package *bnlearn*.

When calculating the area under ROC curves (AUC) for these algorithms, we restricted the curve to a range of specificity between 0.95 and 1. This is because, in the simulated models, each target mRNA/protein has 3 to 5 direct regulators, where the number of candidate regulators is 120. Therefore, 95% specificity means 6 false positives, which in turn means a precision of 45% or lower. Lower the specificity implies that the precision will be well below 50%.

### Additional reference

Hurvich, C. M. and Tsai, C.-L. (1989) Regression and time series model selection in small samples, *Biometrika* 76, 297–307.



Supplemental figures

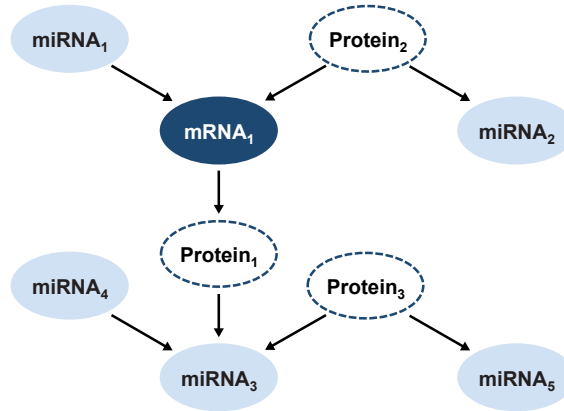

**Fig. S1. A hypothetical miRNA/mRNA/protein regulatory networks.** For illustration, let us consider a hypothetical miRNA/mRNA/protein regulatory network, shown in Fig. S1. This diagram represents the following regulatory relations: miRNA<sub>1</sub> and protein<sub>2</sub> regulate mRNA<sub>1</sub>; mRNA<sub>1</sub> regulates protein<sub>1</sub>, which it encodes; protein<sub>2</sub> also regulates miRNA<sub>2</sub>; miRNA<sub>3</sub> is regulated by protein<sub>1</sub>, protein<sub>3</sub>, and miRNA<sub>4</sub>; protein<sub>3</sub> also directly regulates miRNA<sub>5</sub>. The nodes representing the proteins are circled with dashed line to indicate that the expression of the proteins is not measured. It can be shown that, except for some unlikely cases, as the sample size goes to infinity, when regressing against mRNA<sub>1</sub>, all the miRNAs in Fig. S1’s diagram would be identified as potentially regulating mRNA<sub>1</sub> (Pellet and Elisseeff, 2008; Spirtes, et al., 2000). In general, a regression model with a target mRNA or protein as the dependent variable and the miRNAs as independent variables may include many miRNAs that neither directly nor indirectly regulate the mRNA or protein.

References to Fig. S1

Pellet, J-P and Elisseeff, A. (2008) Using Markov blankets for causal structure learning. *JMLR*, 9, 1295-1342.  
 Spirtes, P, et al. (2000) *Causation, Prediction, and Search*. Cambridge: MIT Press.

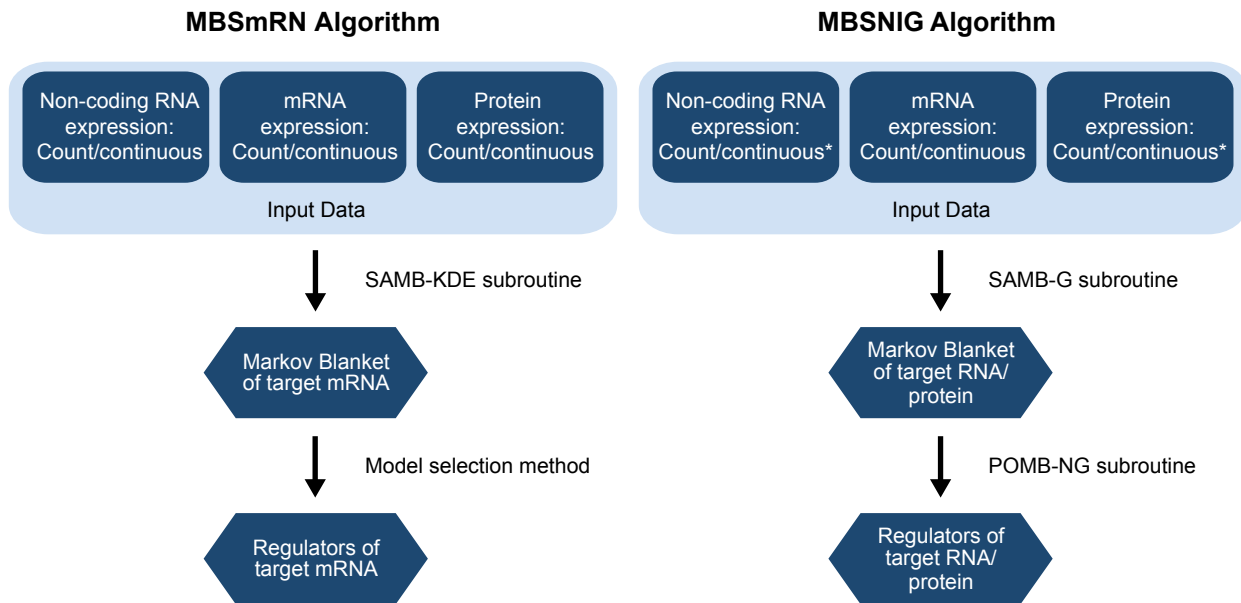

\* The expression data for the target RNA/protein of MBSNIG must be count data

**Fig. S2.** Flow charts for the MBSmRN and MBSNIG algorithms. Note that users can incorporate their prior knowledge about the regulator relations by filtering the input data. (See discussion at the end of the Method section).

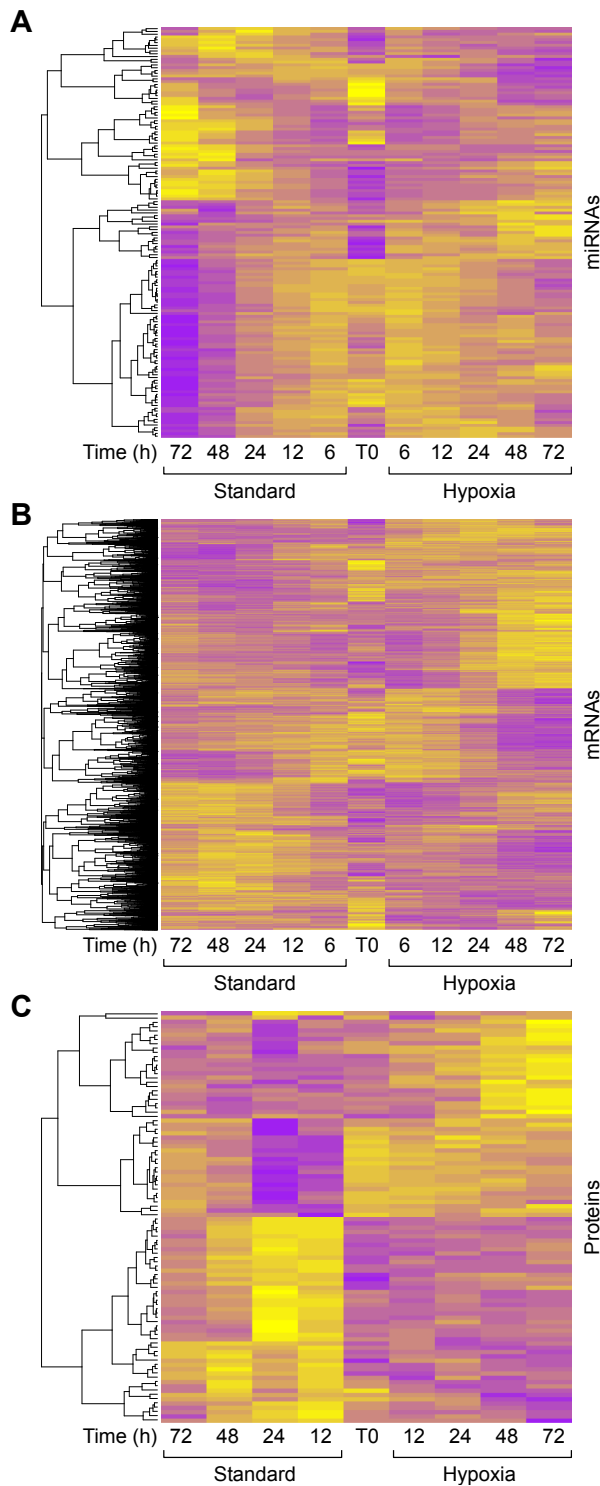

**Fig. S3.** Heatmaps of miRNAs/mRNAs/proteins that are differentially expressed between standard and hypoxic conditions. A miRNA/mRNA/protein is considered differentially expressed if it exhibits altered expression between the standard and the hypoxic conditions in at least one time point. Values plotted are log<sub>2</sub> intensity for miRNAs and mRNAs, and log<sub>2</sub> count for proteins. Yellow color represents higher expression, purple represents lower expression. The miRNAs/mRNAs/proteins are clustered using hierarchical clustering.

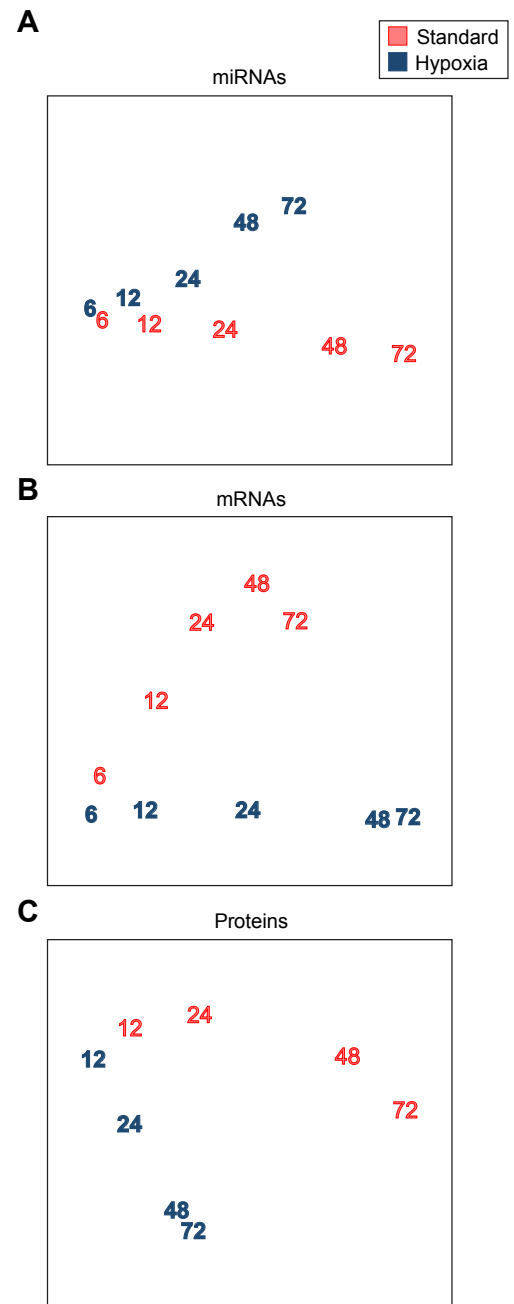

**Fig. S4.** Classical multidimensional scaling of all expressed miRNAs/mRNAs/proteins. Expression values are averaged over the four placentas. The numbers are the time (hours) of cell exposure to standard or hypoxic conditions. The x and y axes are the first two principal components of the expression data. Note the high similarity among the expression patterns of the miRNAs, mRNAs, and proteins, showing a divergence between the hypoxic and standard conditions over the time course.

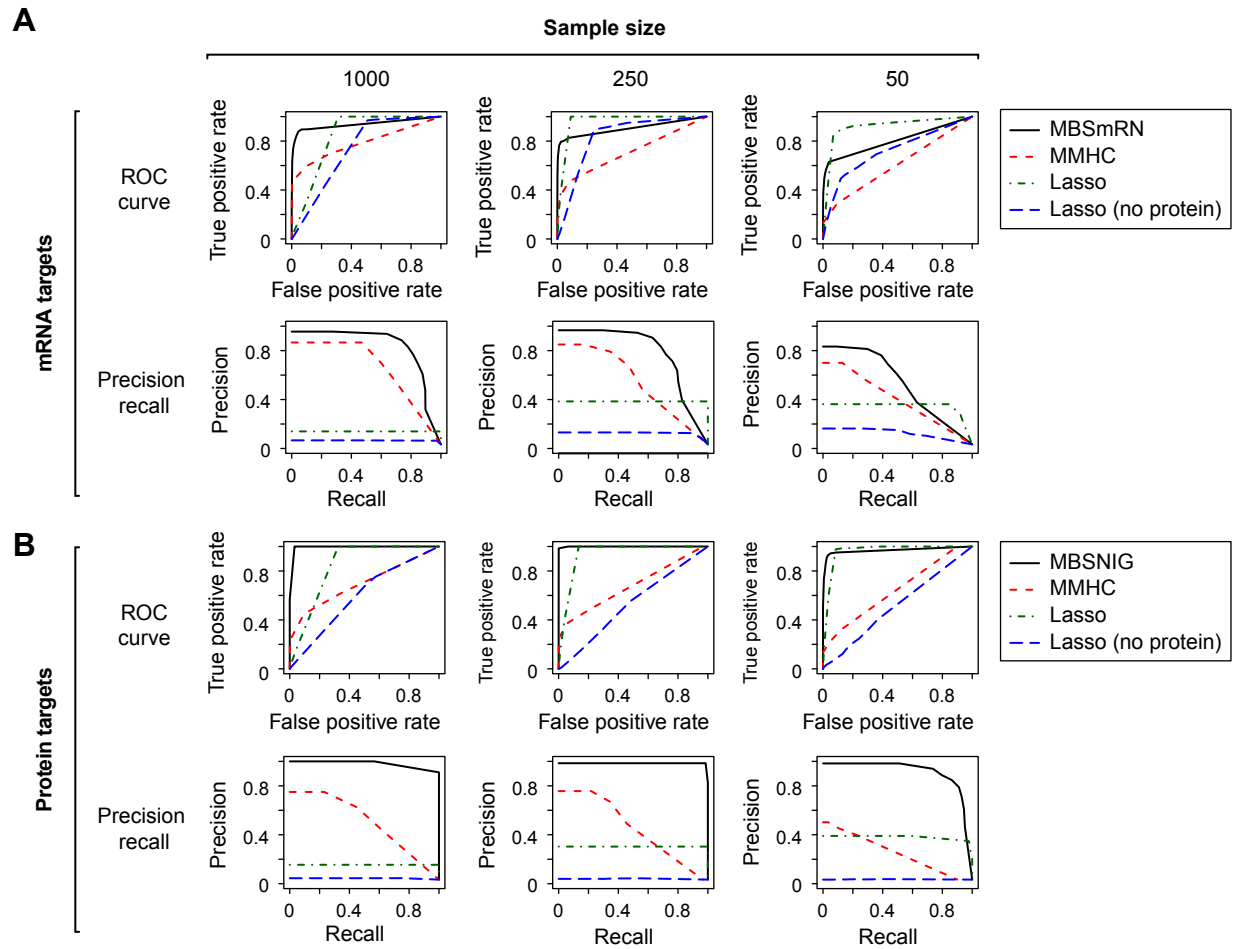

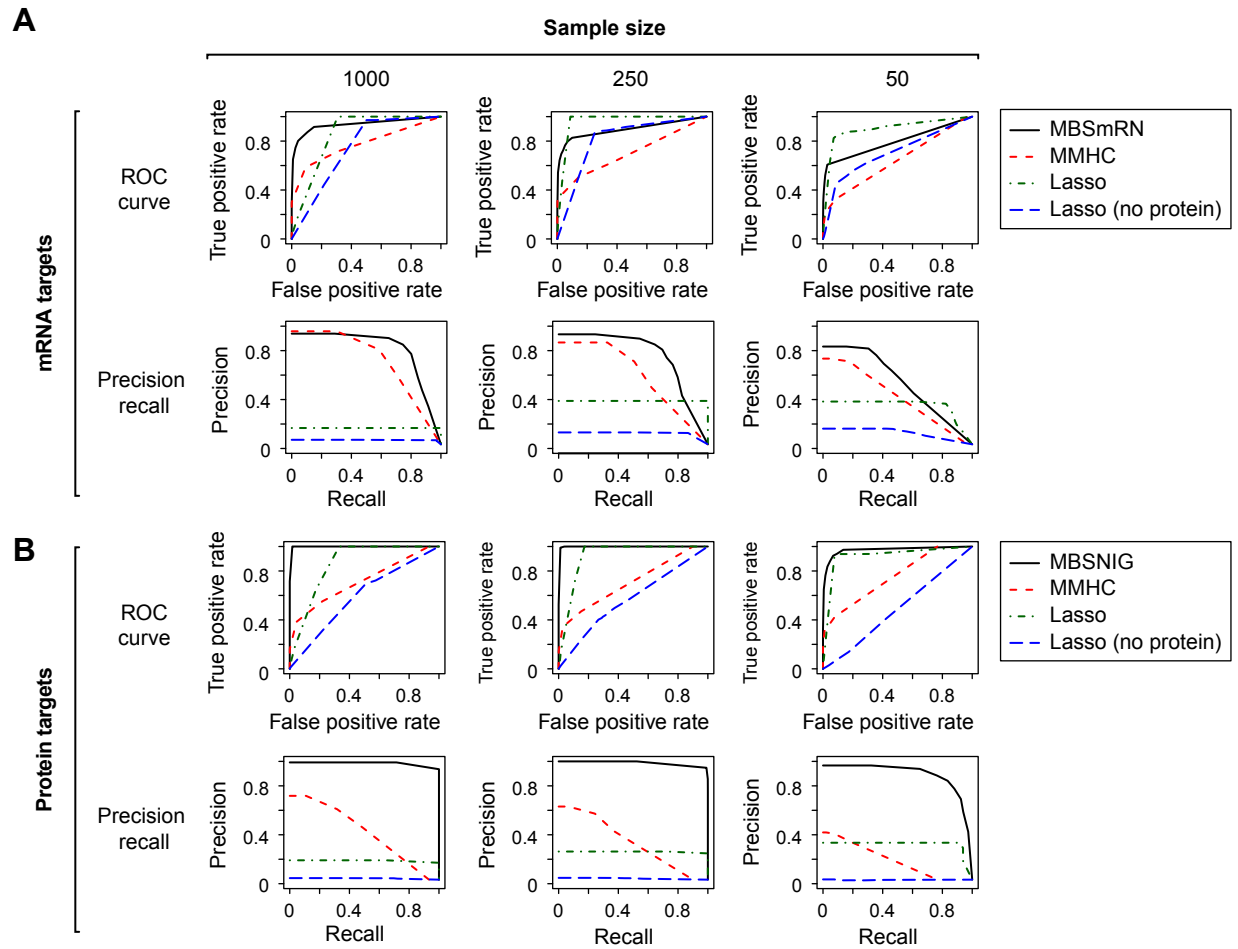

**Fig. S6.** The precision-recall curves and ROC curves of the competing regulatory network learning algorithms for direct regulators of (A) mRNA targets and (B) protein targets, based on the data generated using the third simulated network.

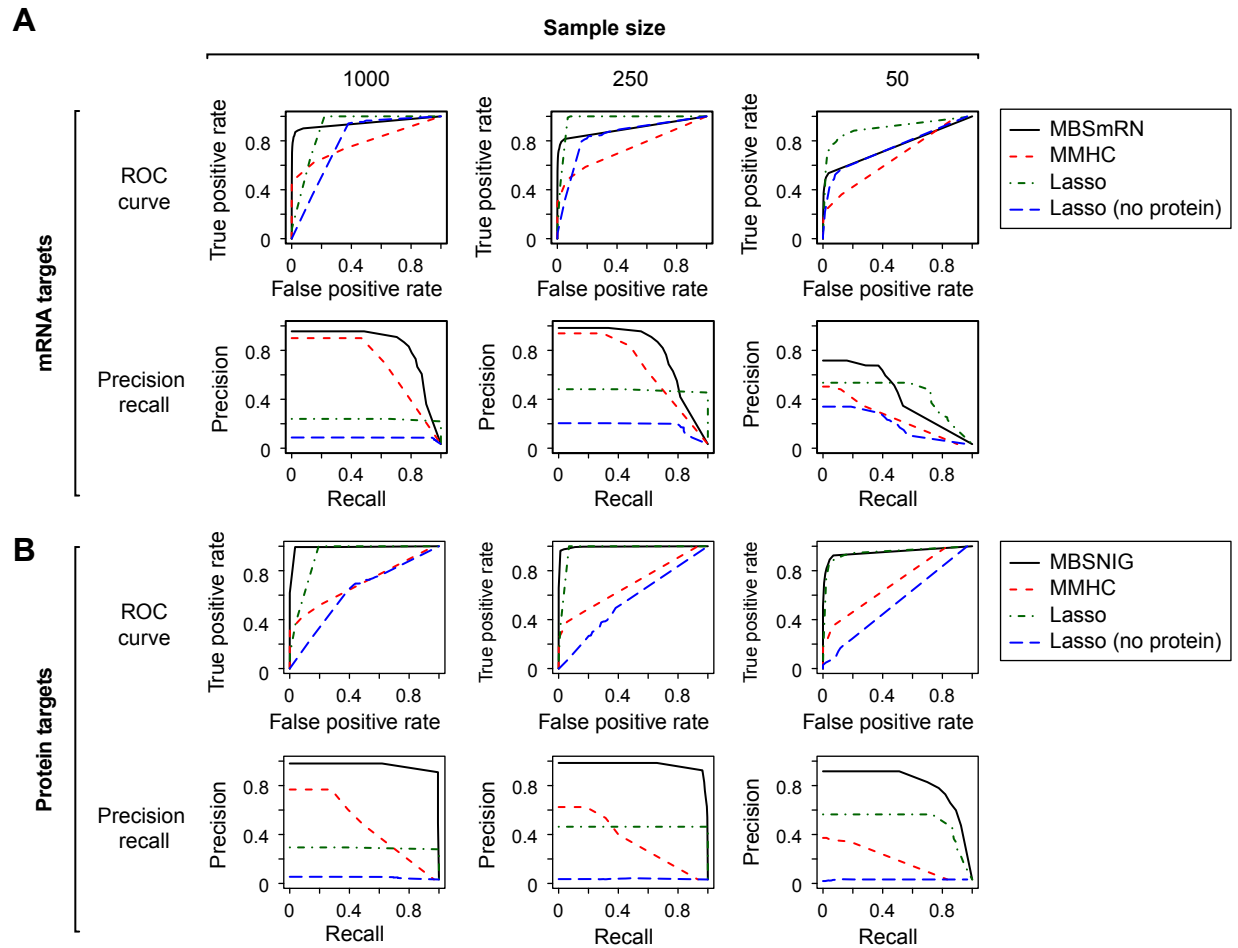

**Fig. S7.** The precision-recall curves and ROC curves of the competing regulatory network learning algorithms for direct regulators of (A) mRNA targets and (B) protein targets, based on the data generated using the fourth simulated network.

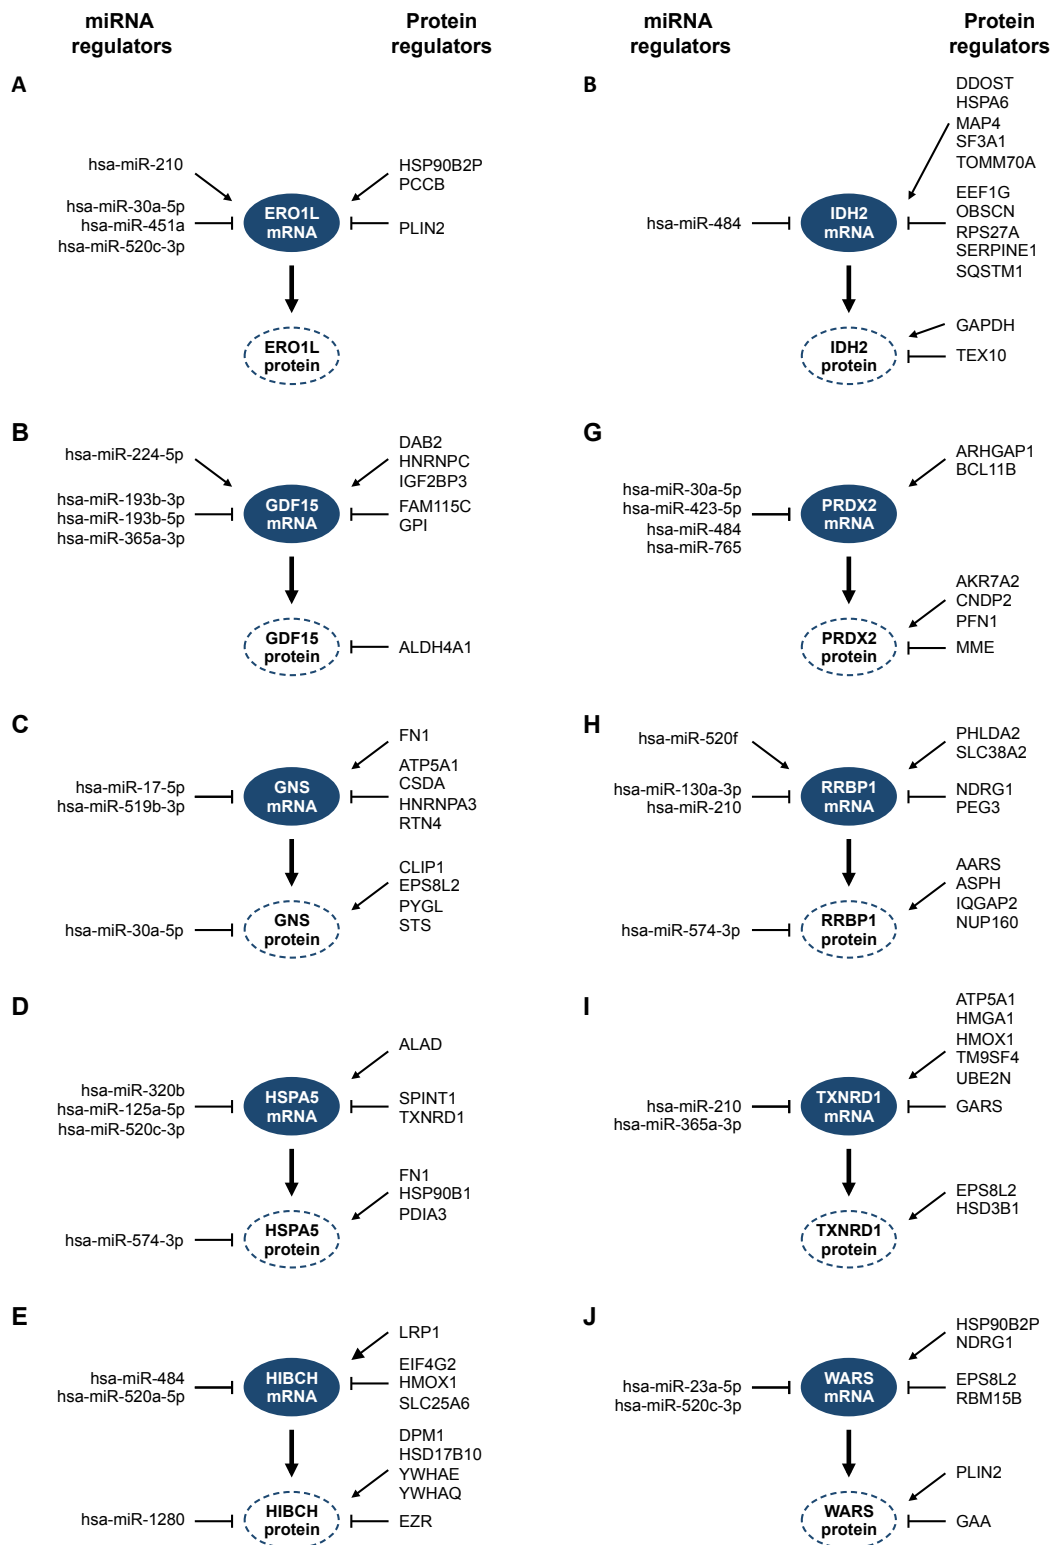

Fig. S8. miRNA/mRNA/protein regulatory network for nine proteins derived by the MBSmRN and MBSNIG algorithms.

Fig. S9 (See following pages) The expression level of the 78 proteins, their mRNA transcripts, and the miRNA directly regulating the mRNA/protein pairs over the time course under standard and hypoxic conditions. Expression values are averaged over the four placentas.

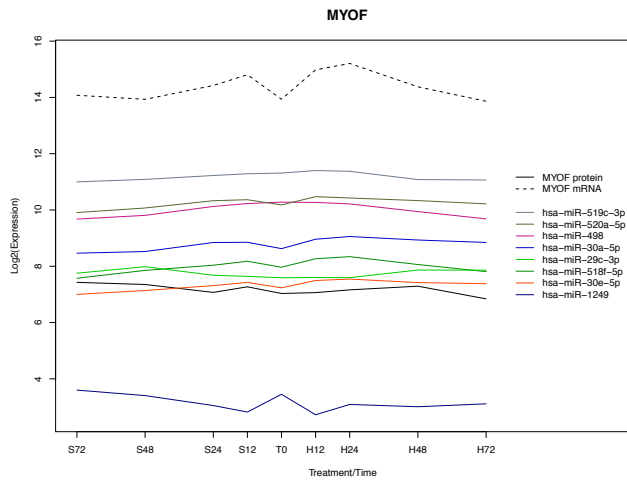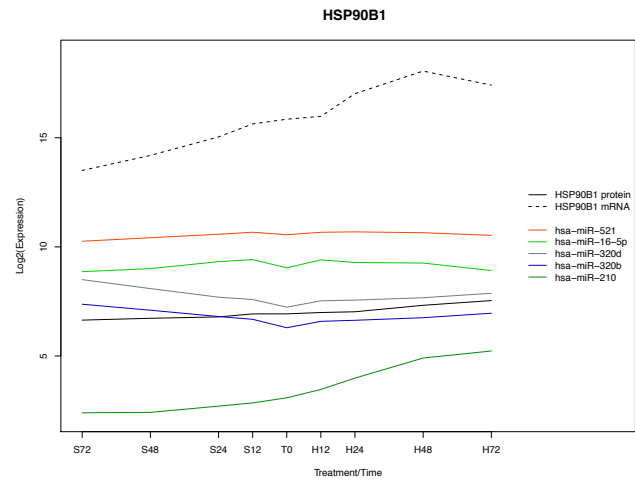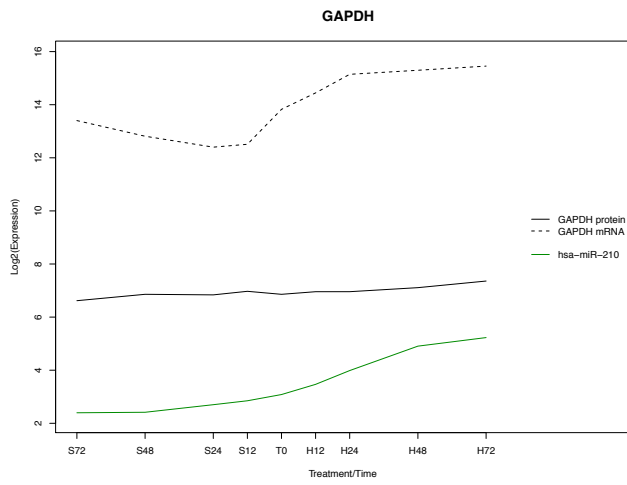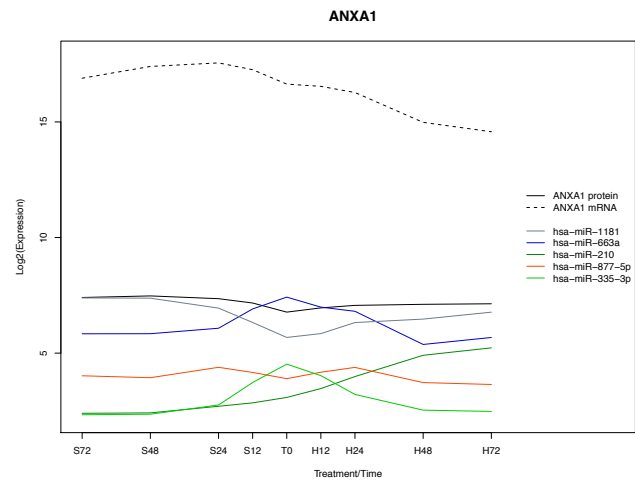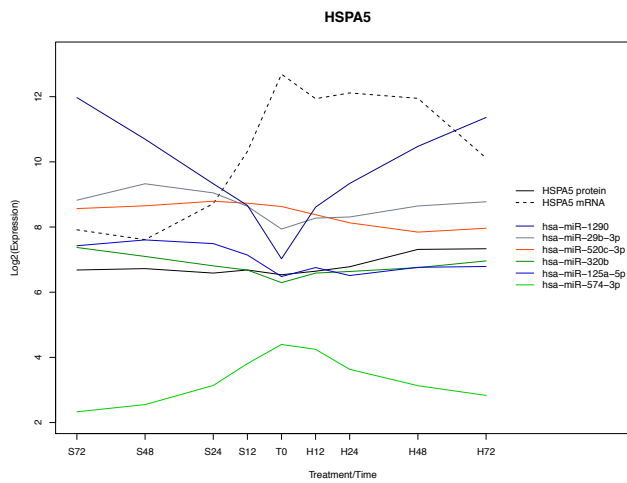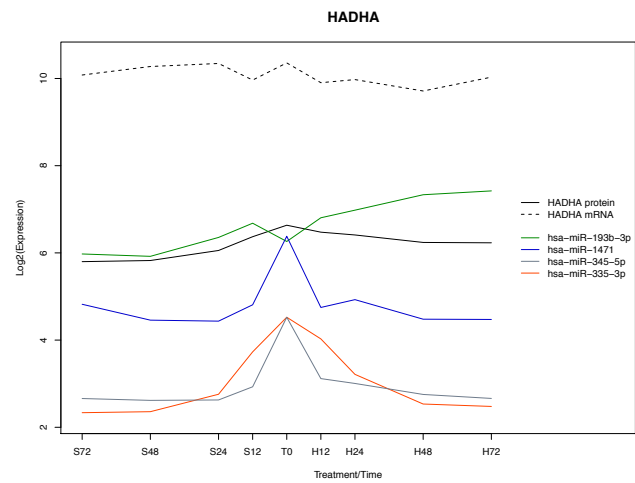

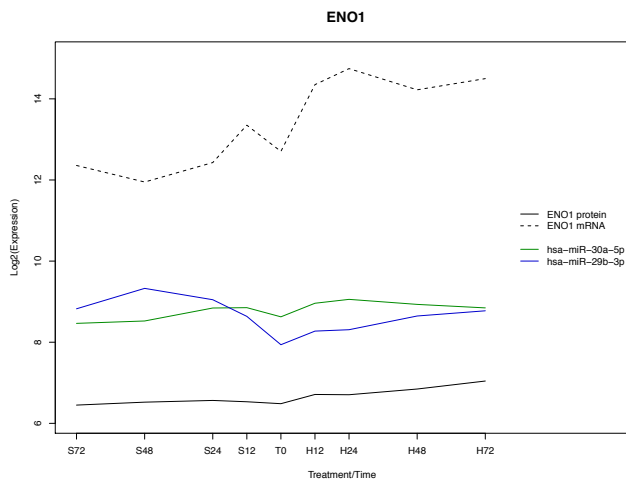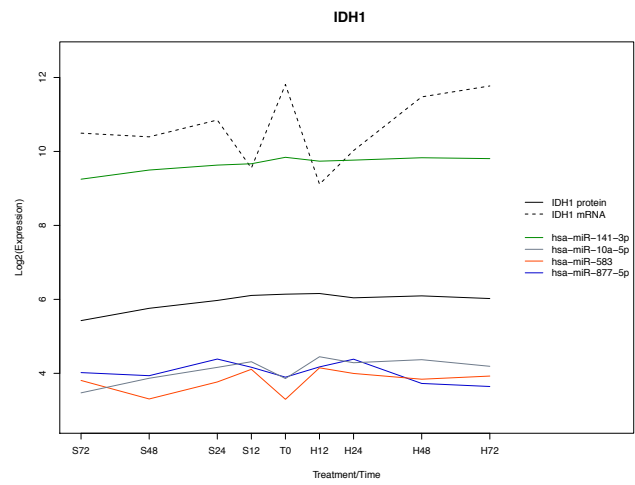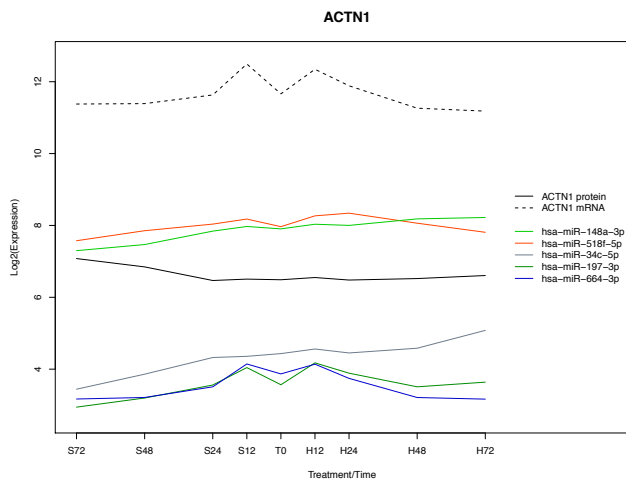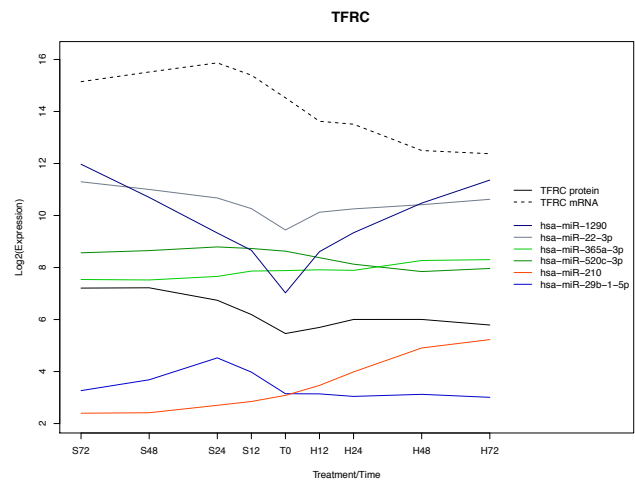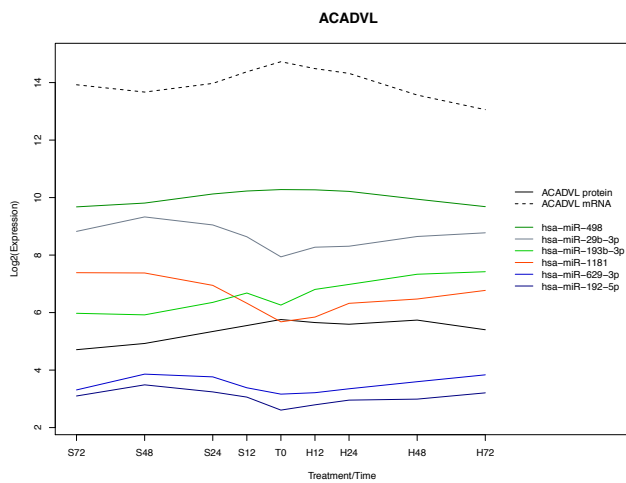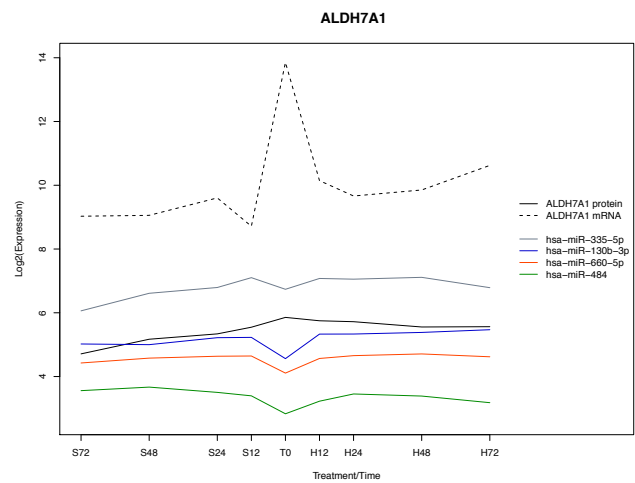



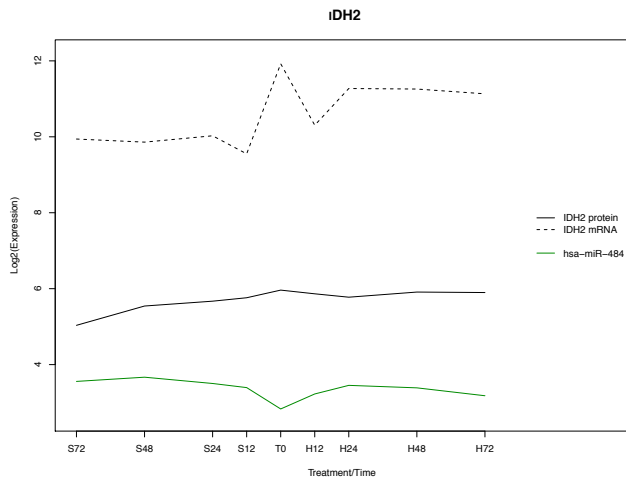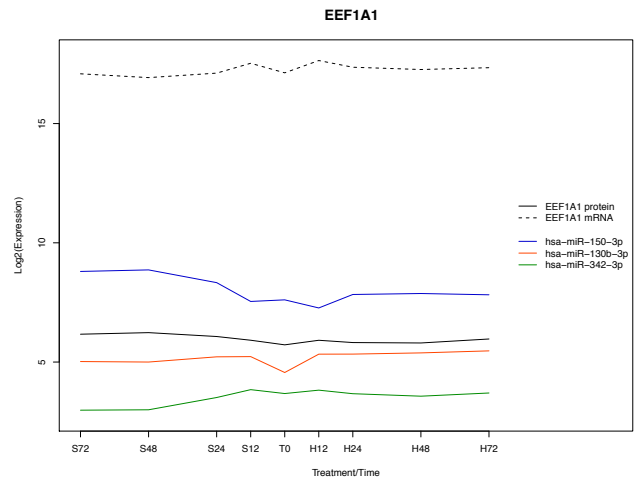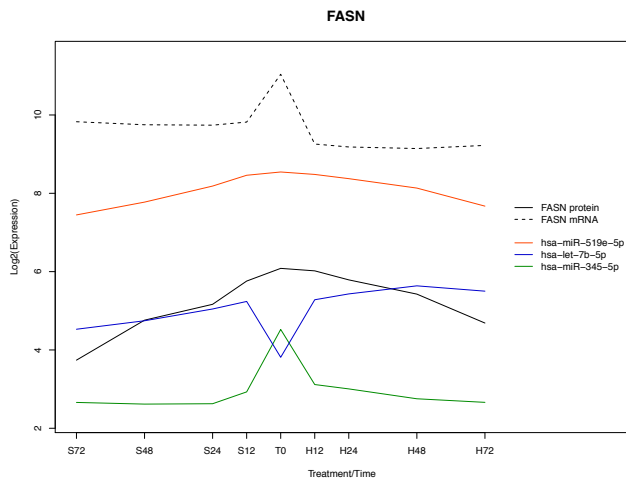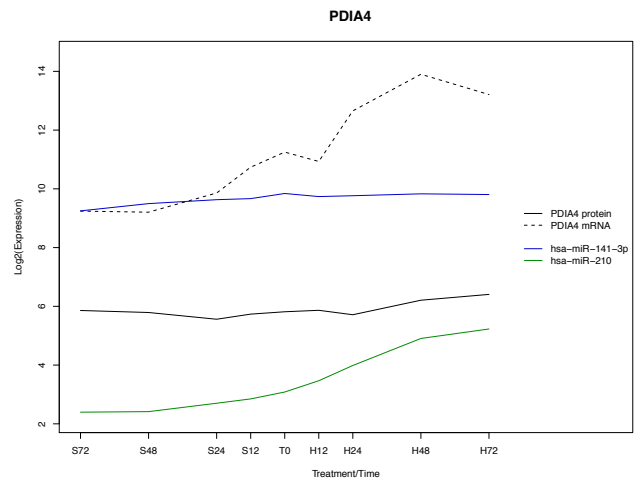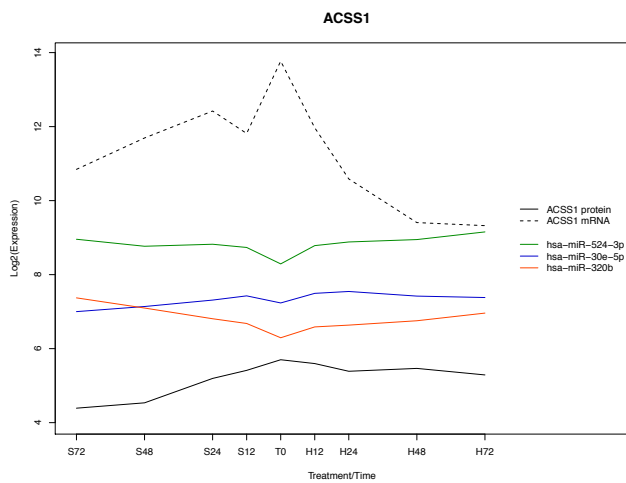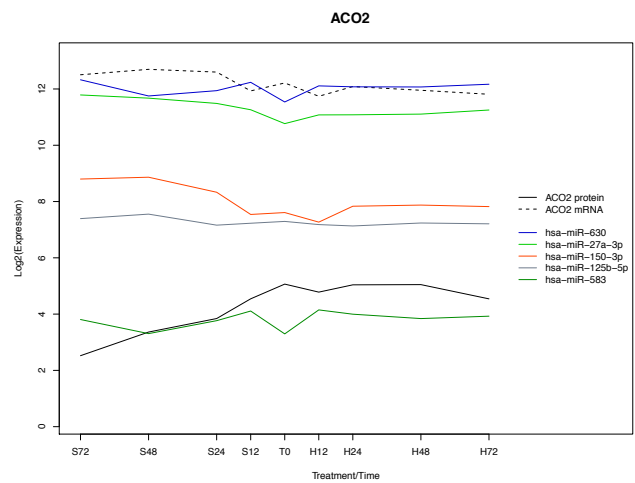

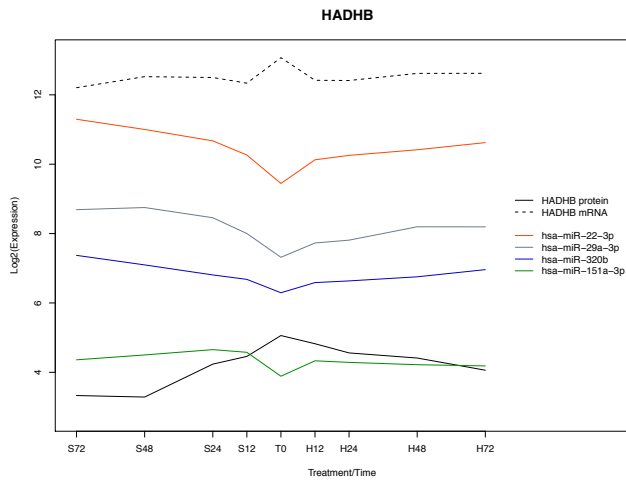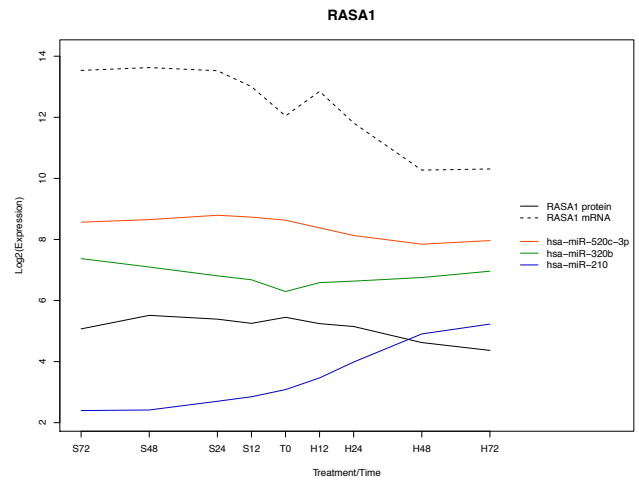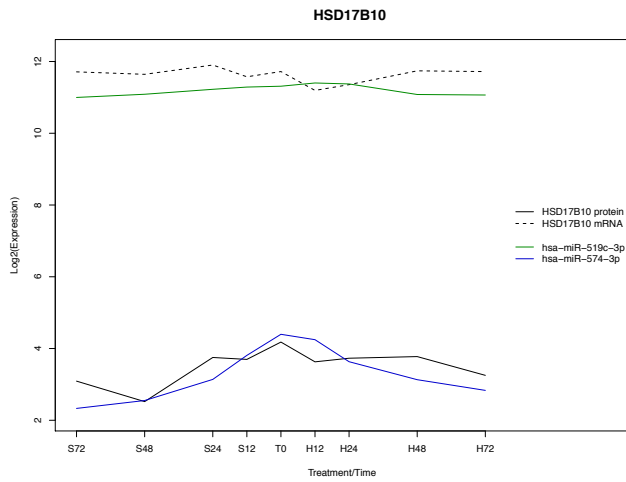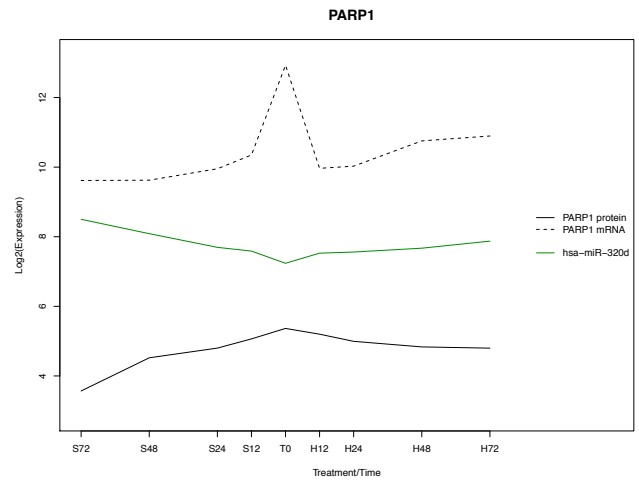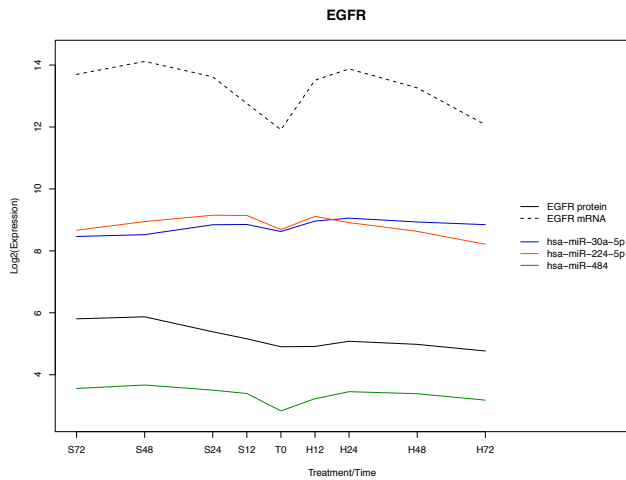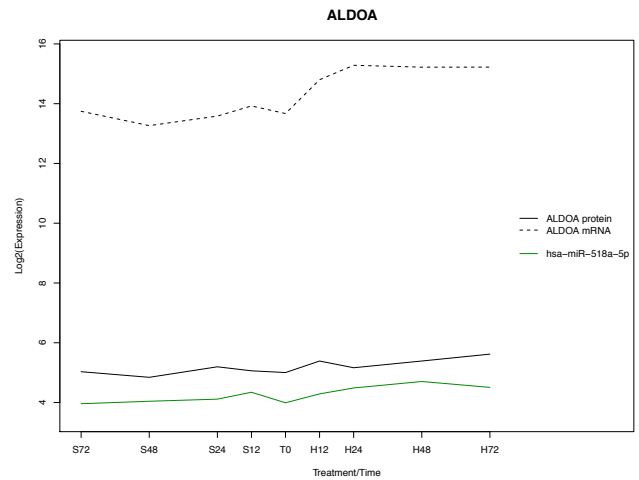

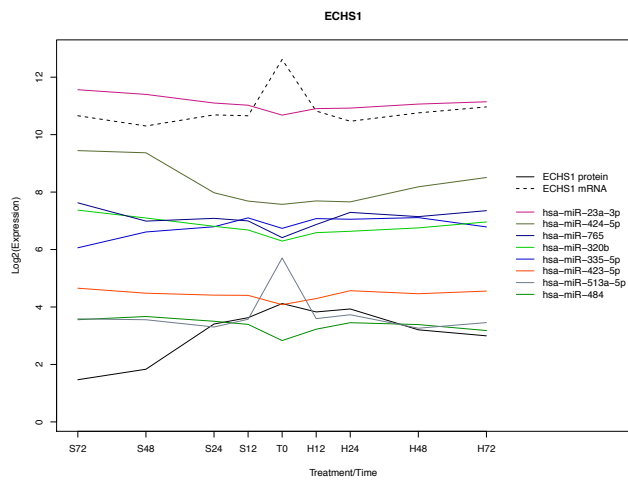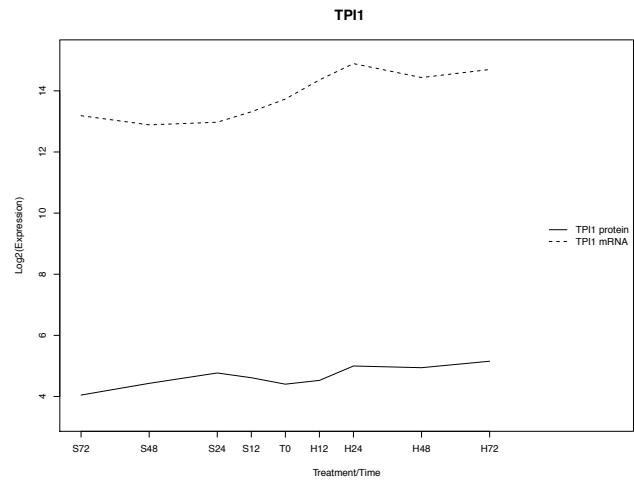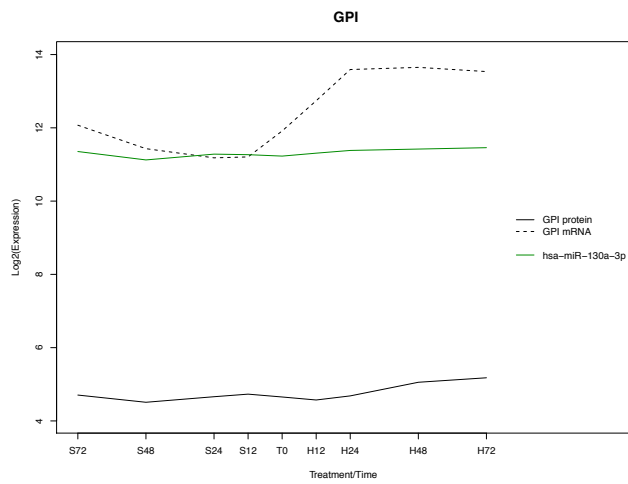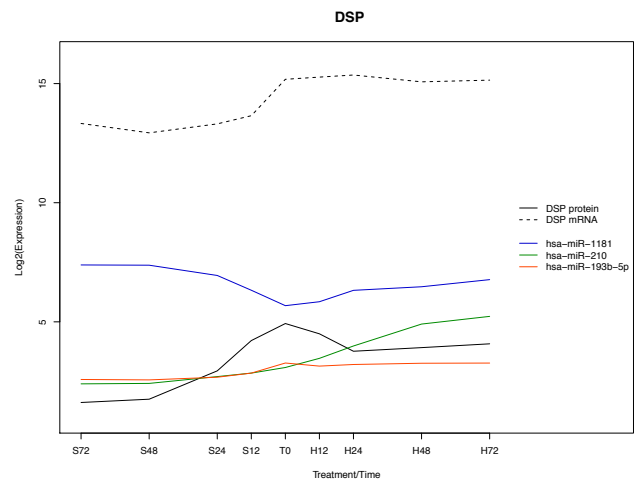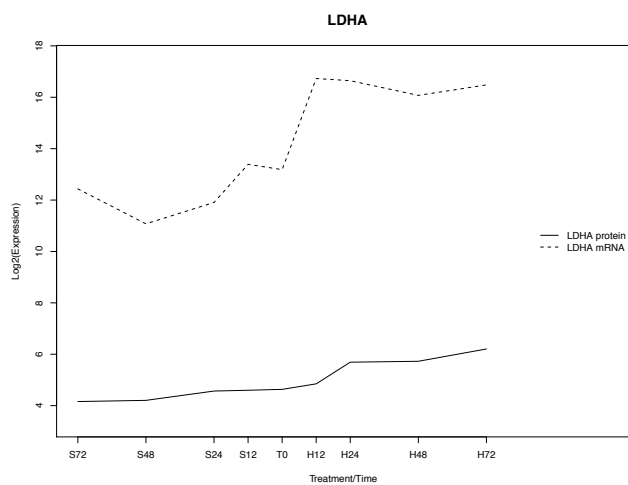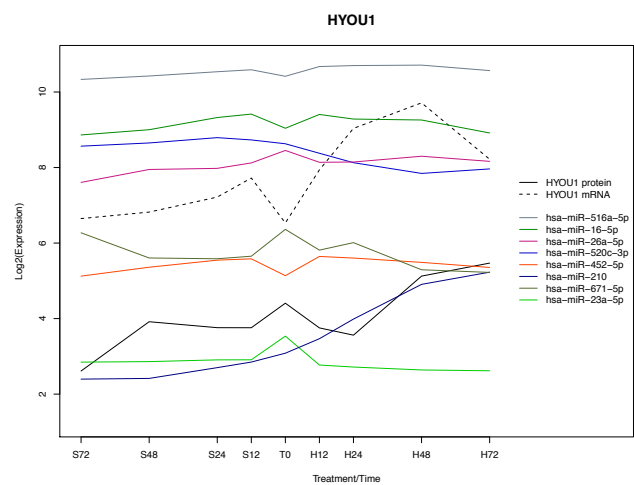

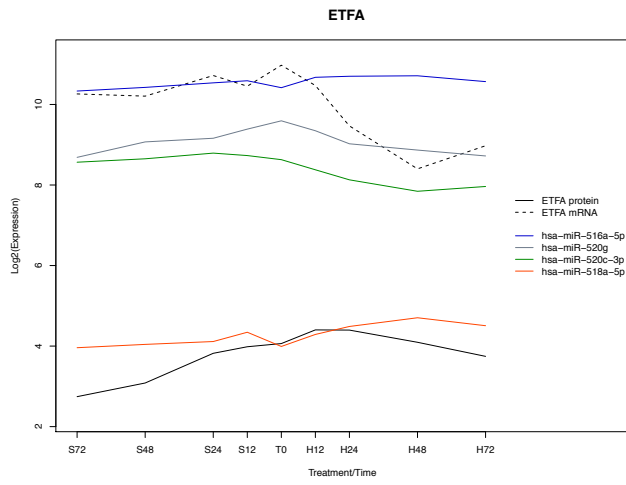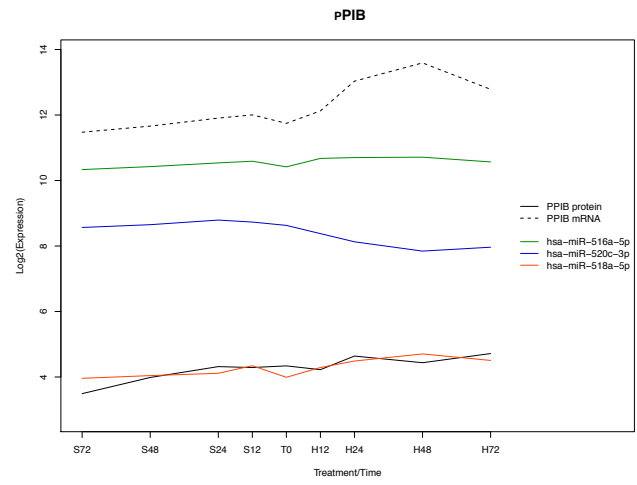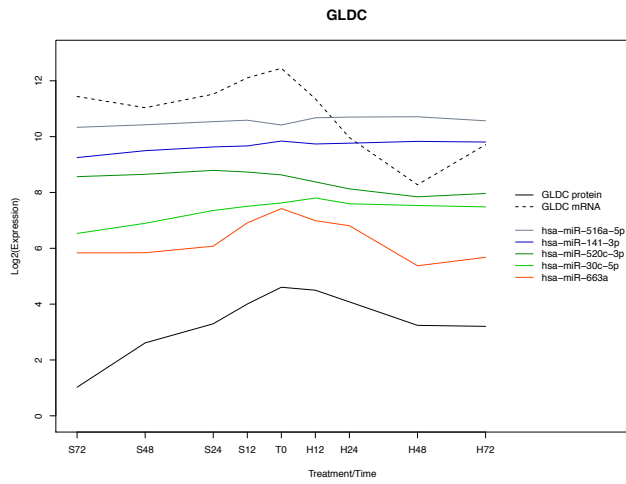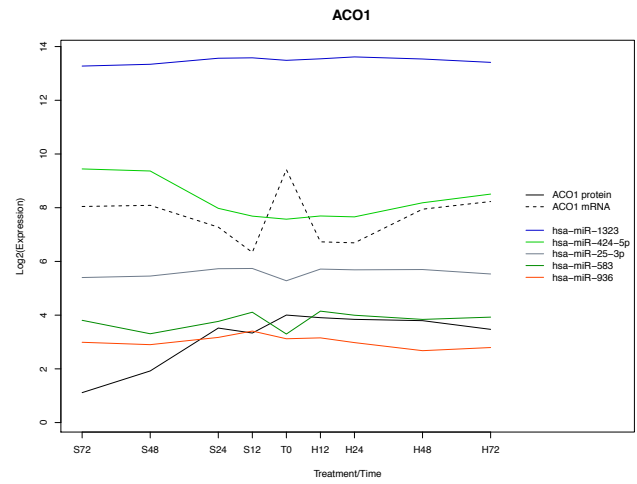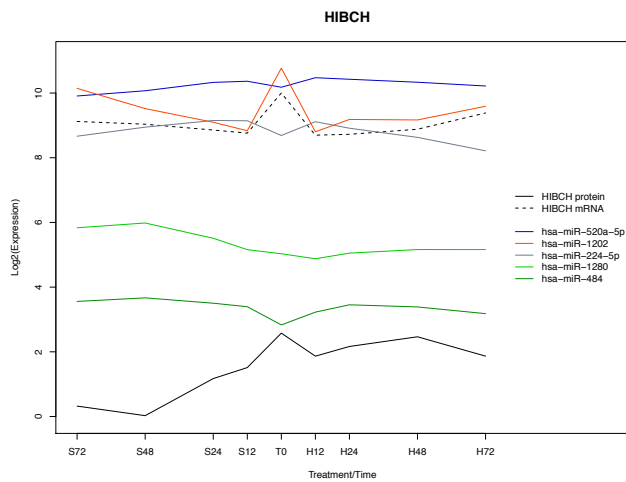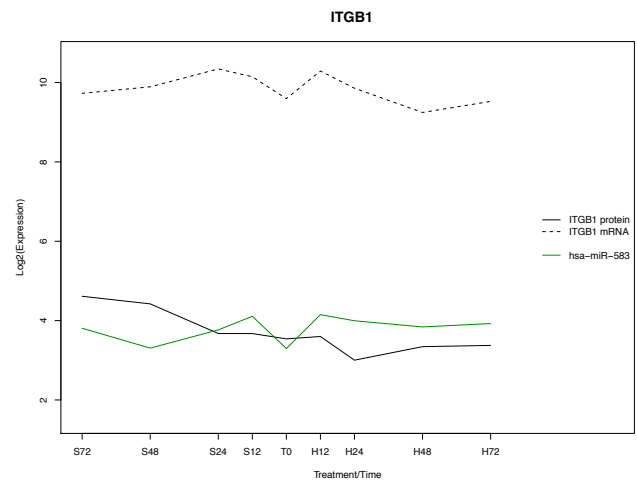

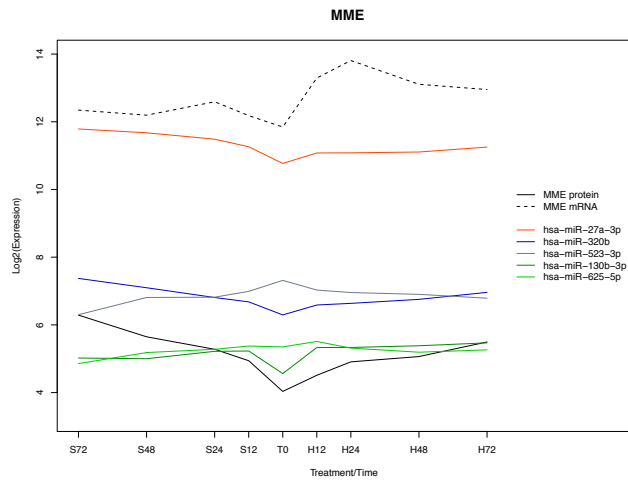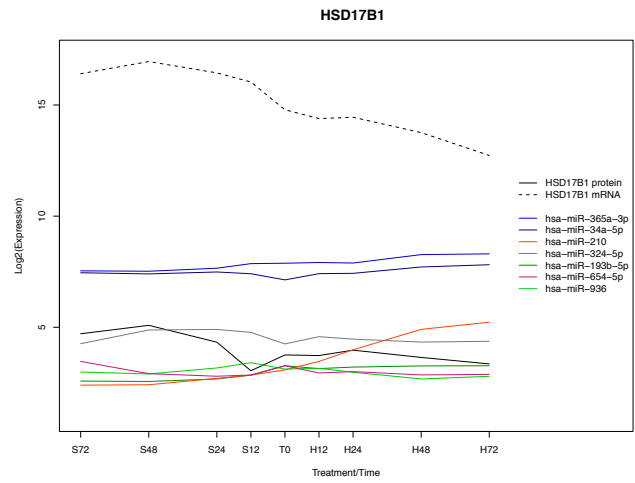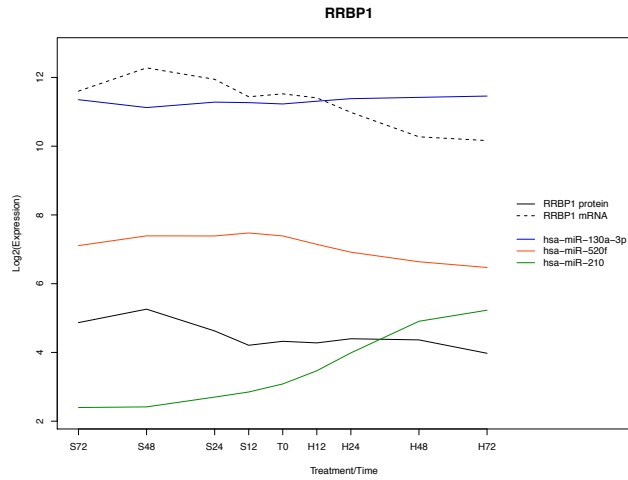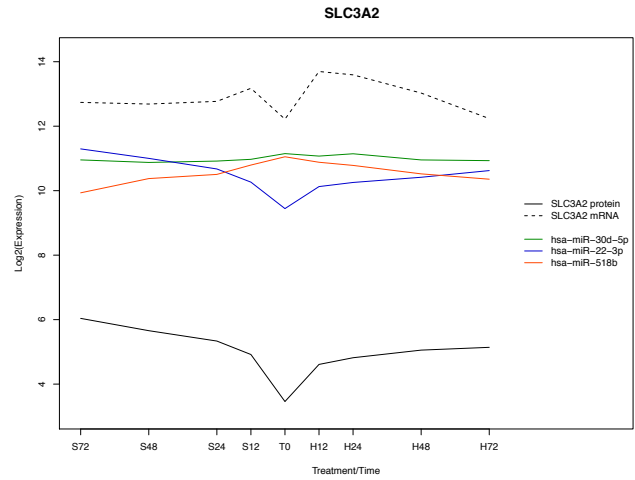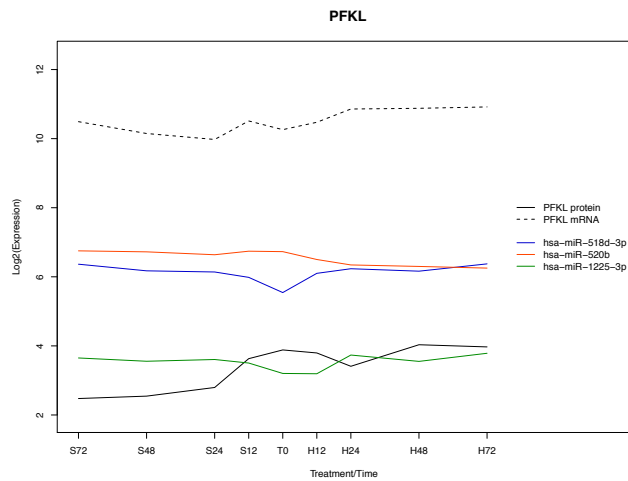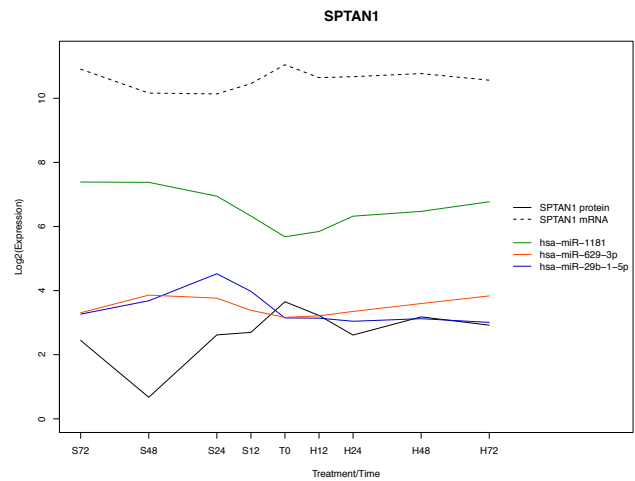

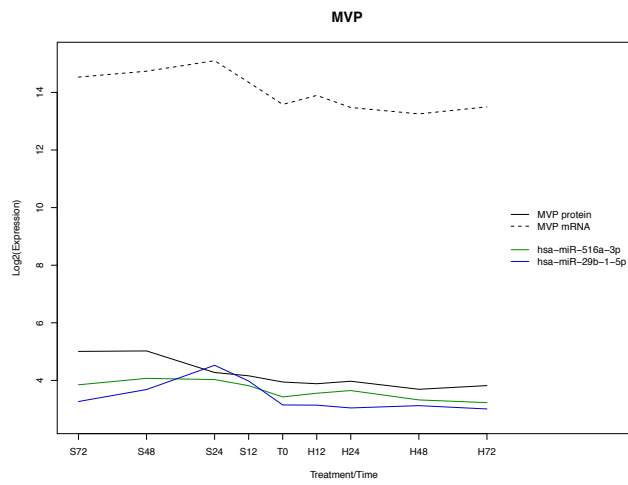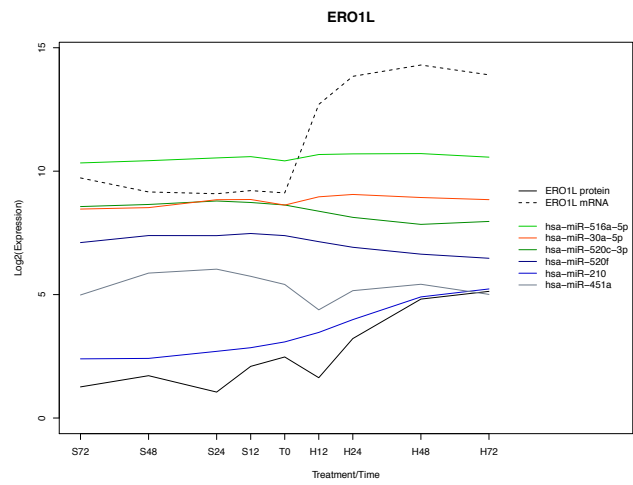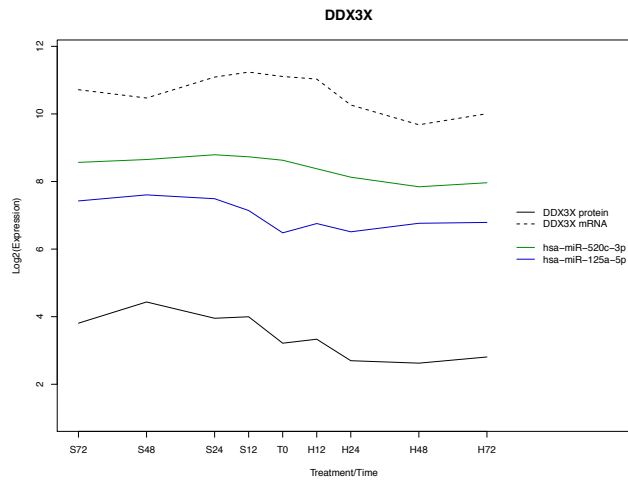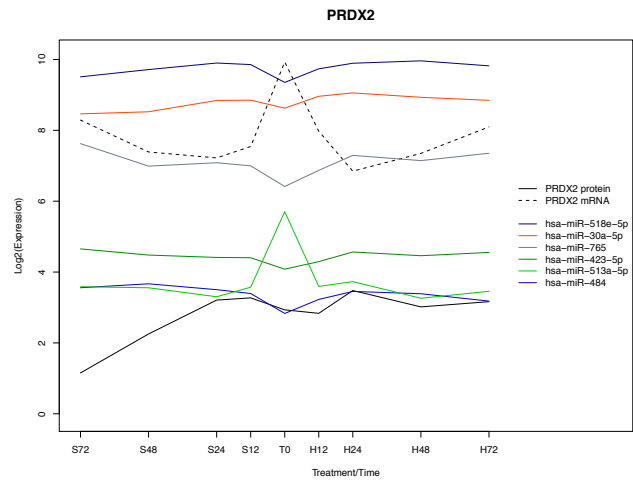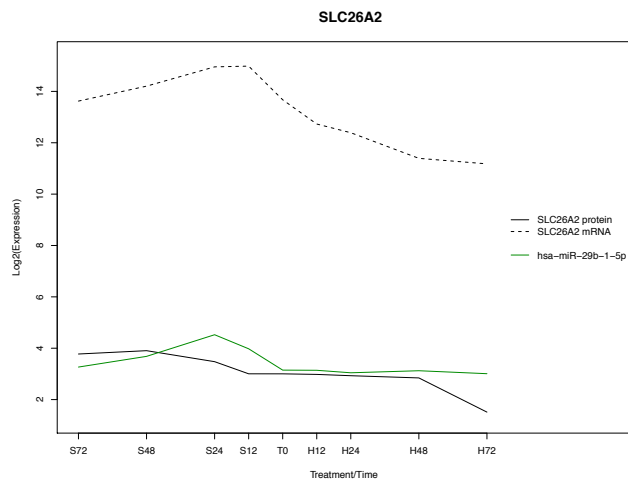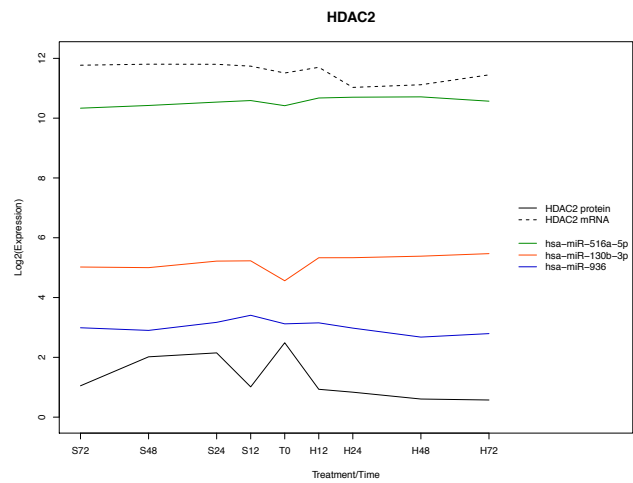

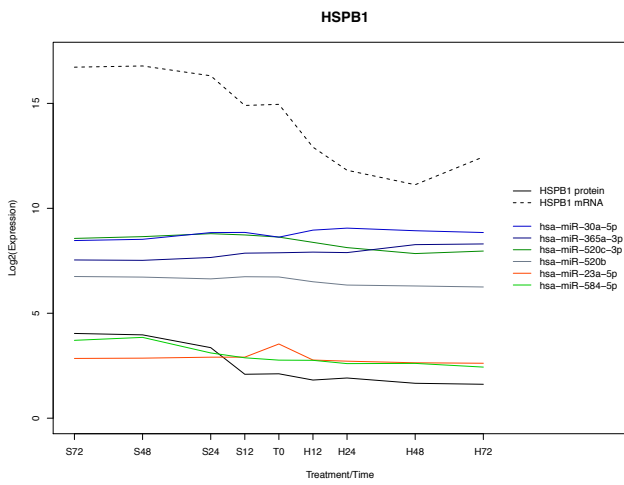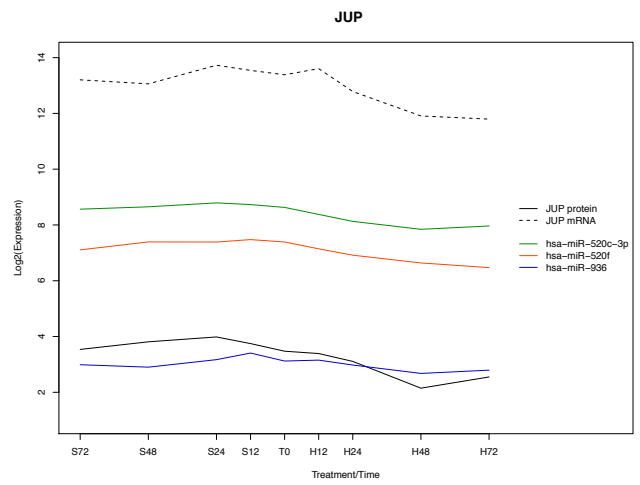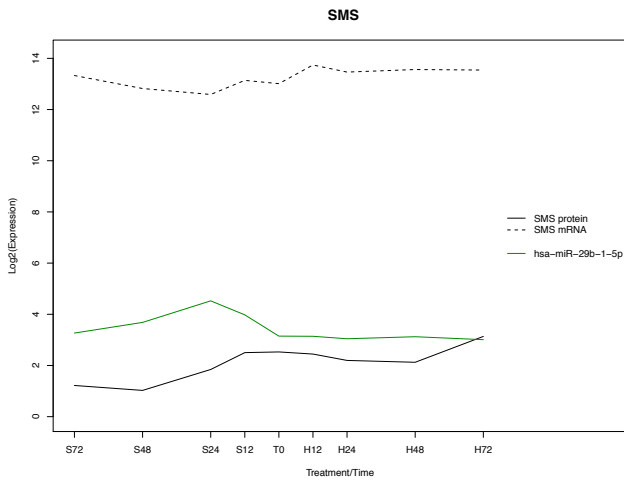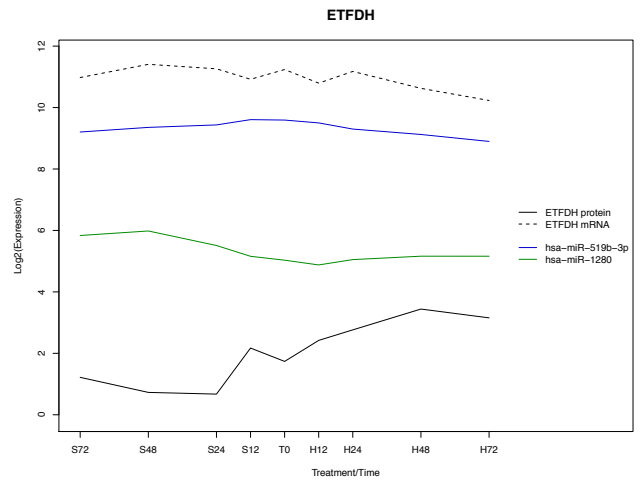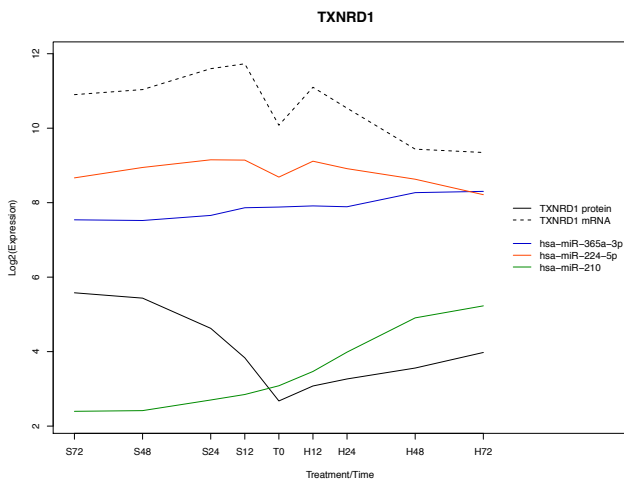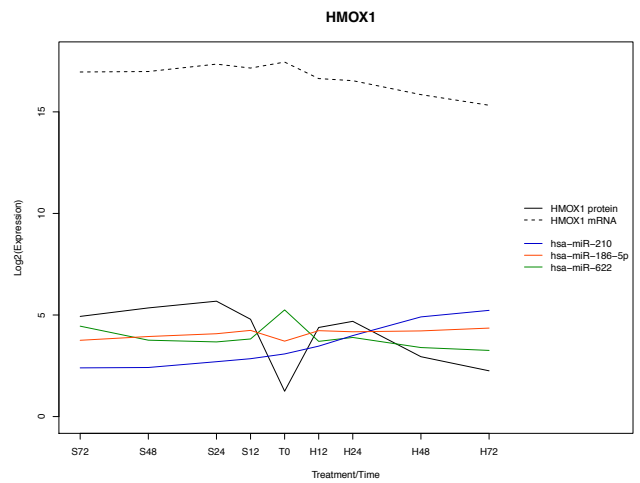

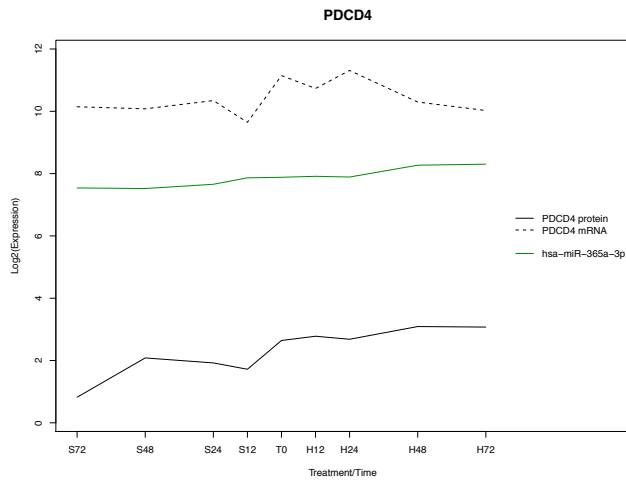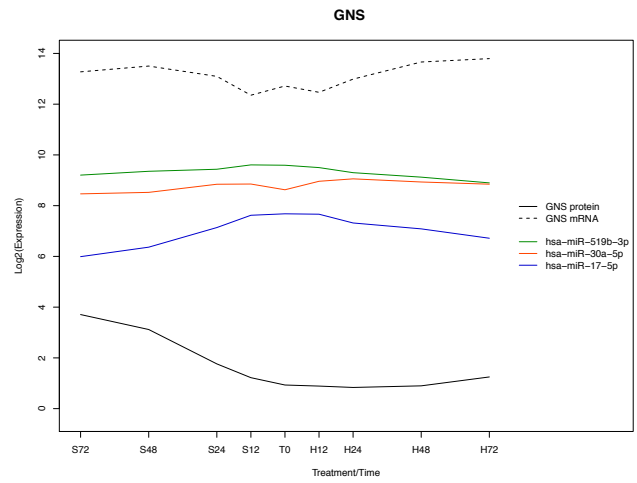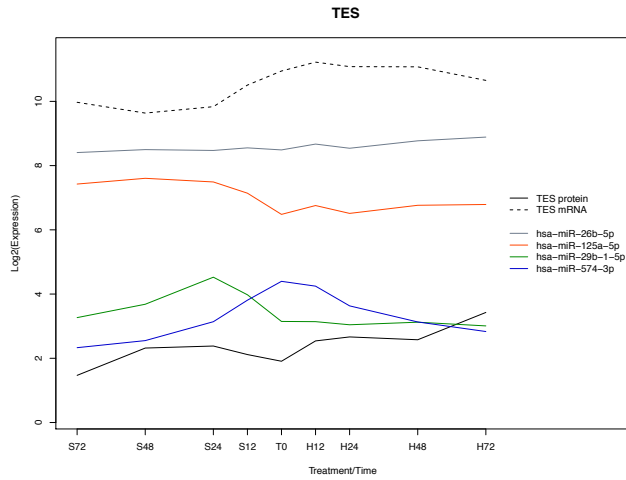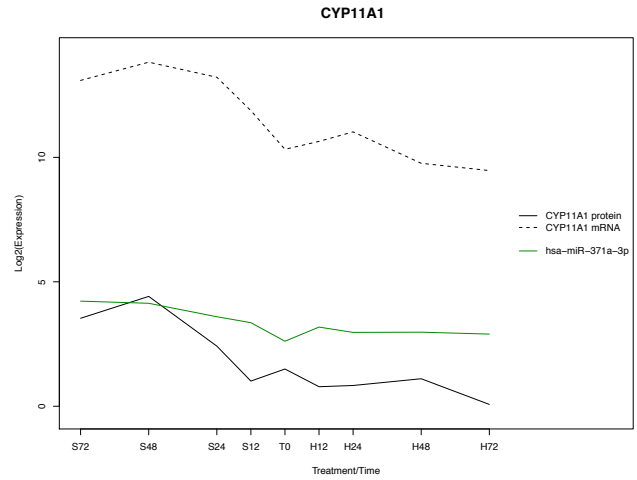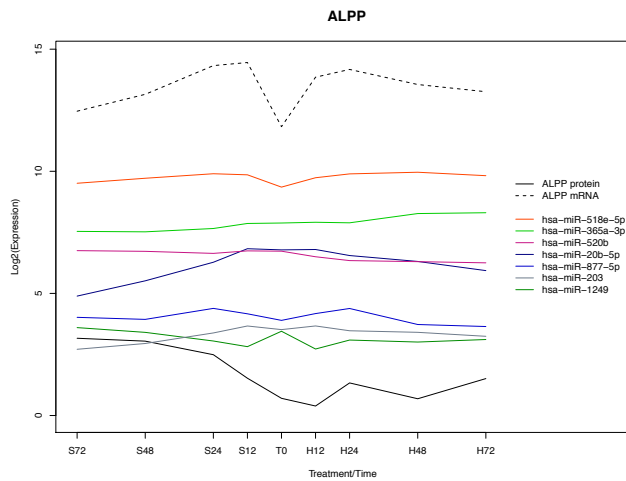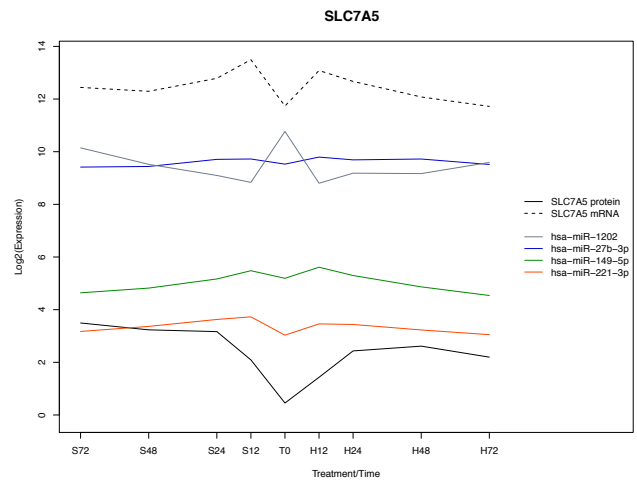



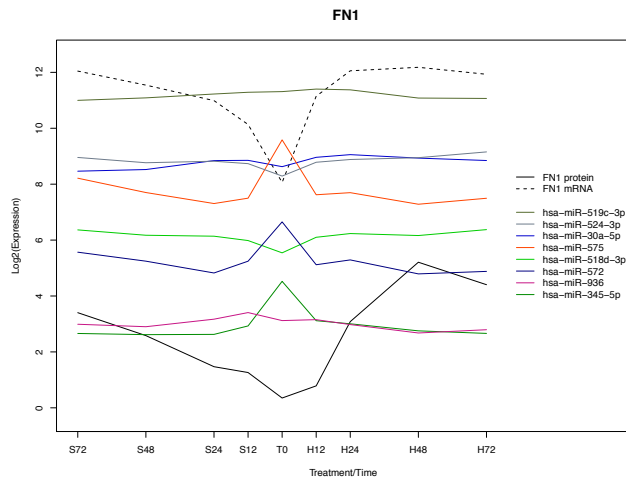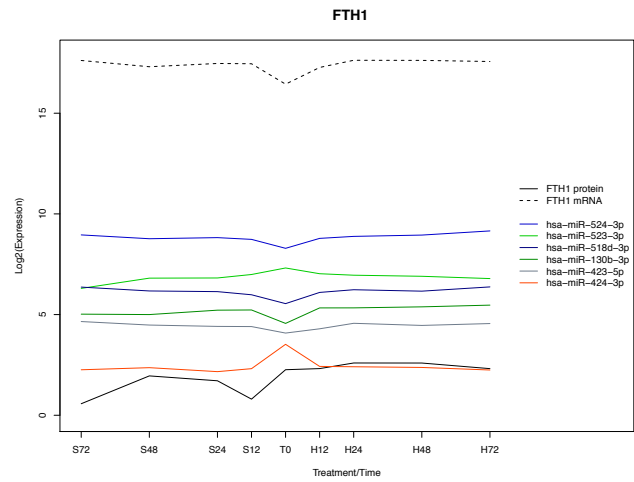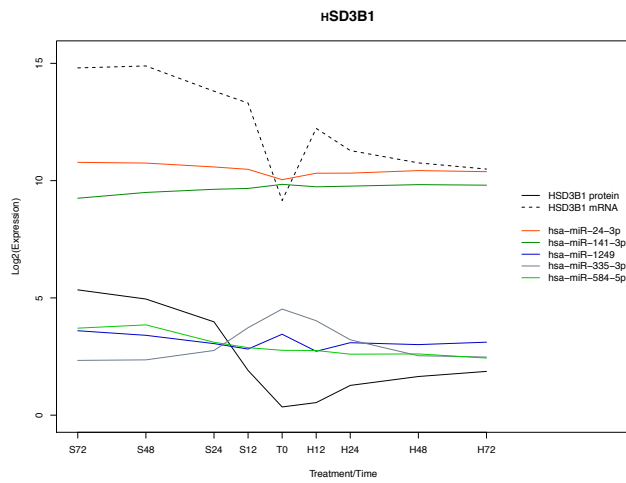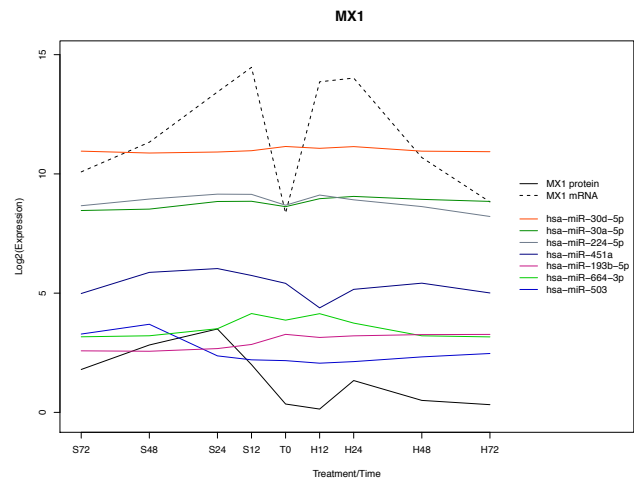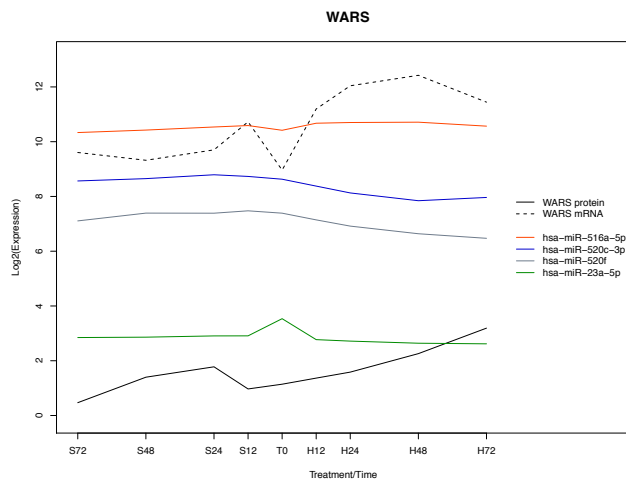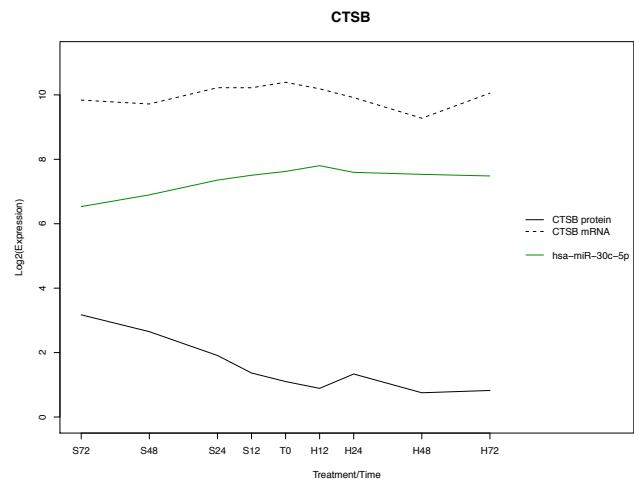

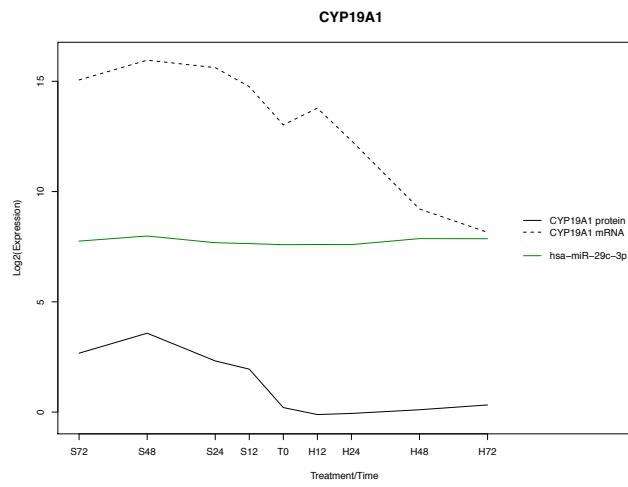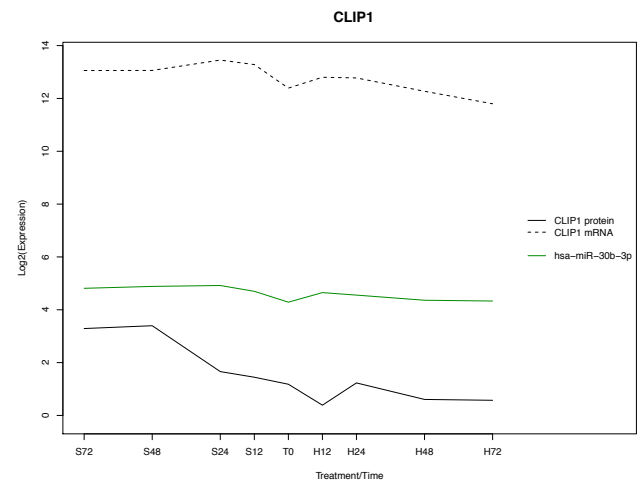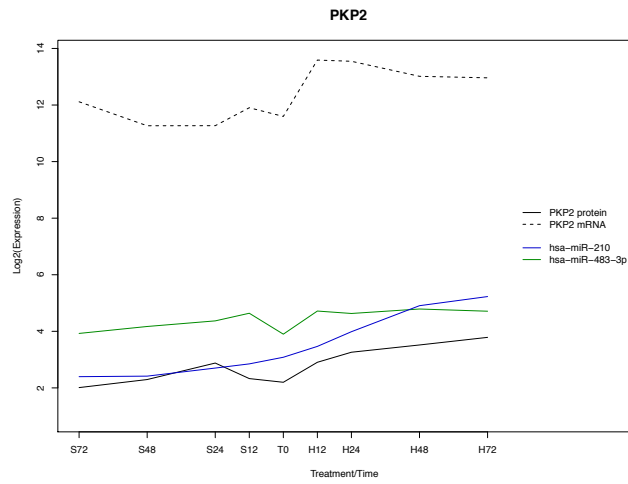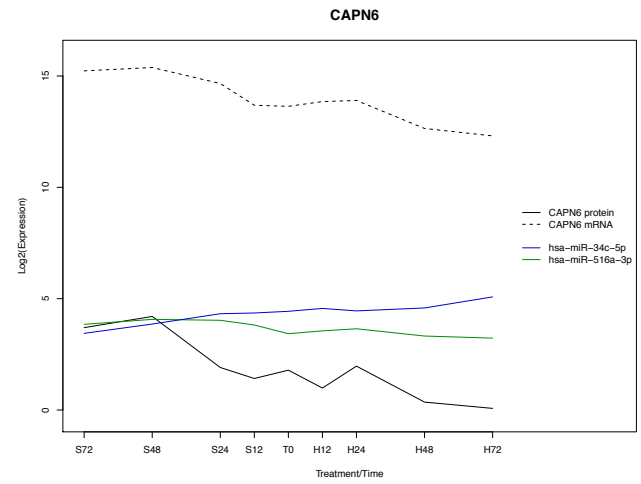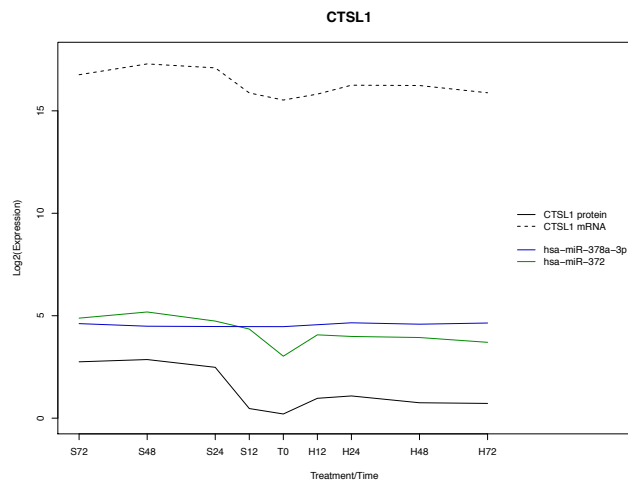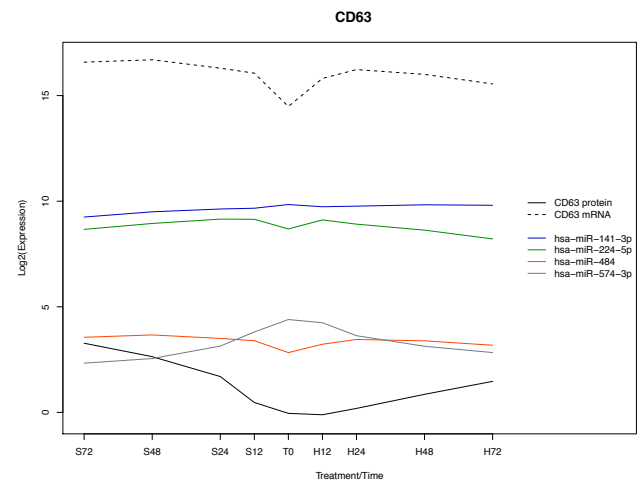

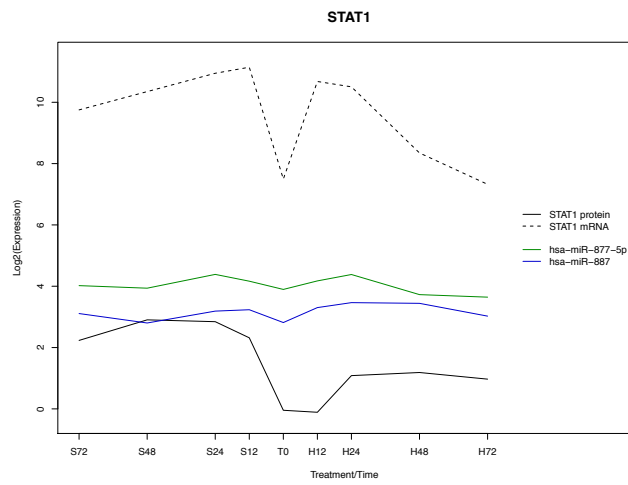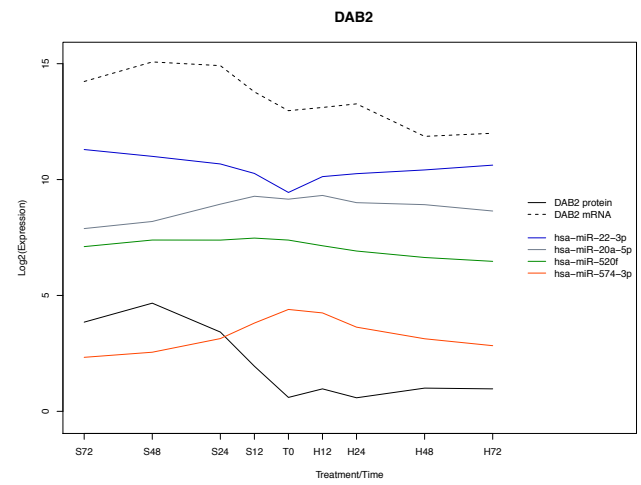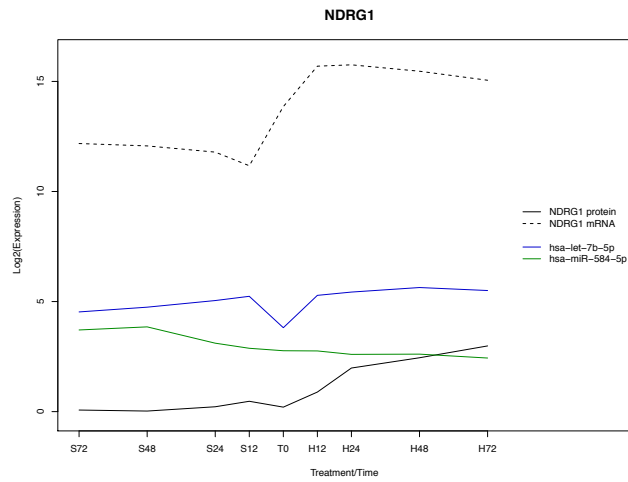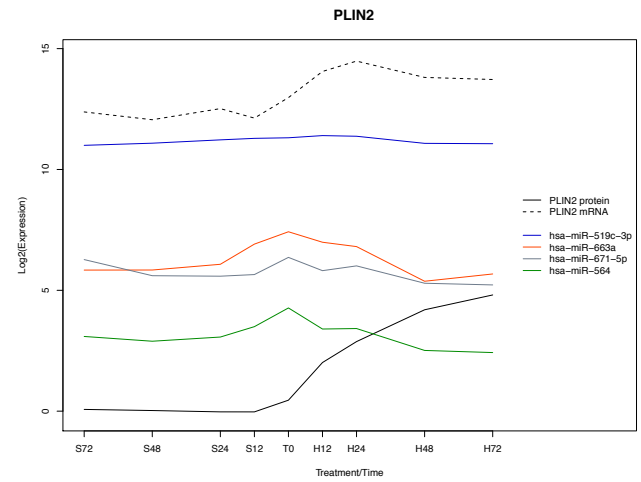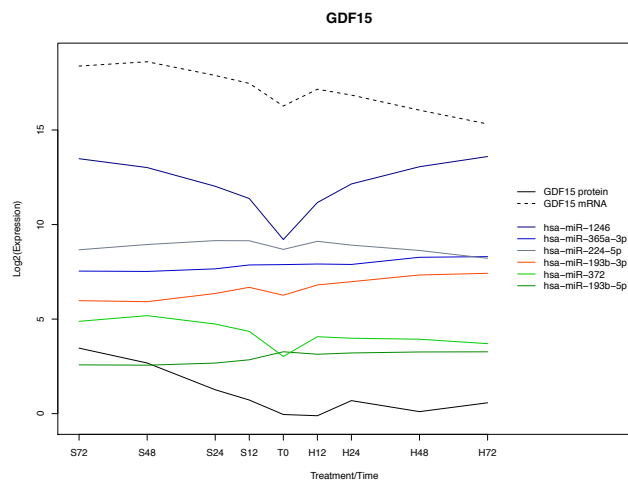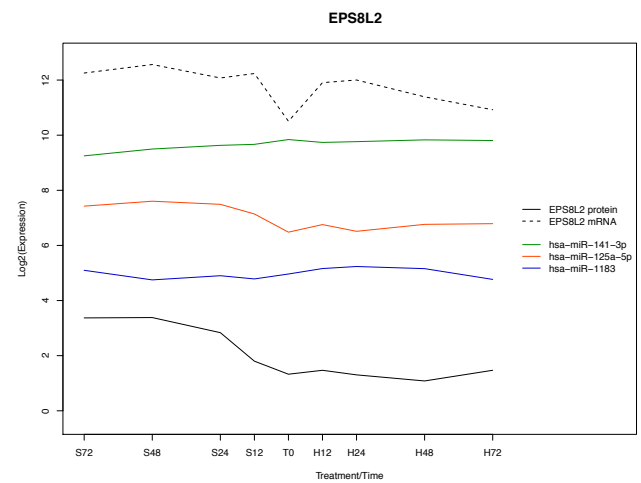

## Supplementary tables

**Table S1.** Comparison of the area under precision-recall curve (AUPRC) of competing regulatory network learning algorithms for the first simulated network. Mean.auprc.1 and mean.auprc.2 are the average of AUPRC over 30 target mRNAs/proteins for the first and the second algorithm, respectively.

| Alg1   | Alg2                | Sample size | Target  | mean. auprc.1 | mean. auprc.2 | wilcox. pval |
|--------|---------------------|-------------|---------|---------------|---------------|--------------|
| MBSmRN | MMHC                | 1250        | mRNA    | 0.8665        | 0.8154        | 0.152969358  |
| MBSmRN | Lasso               | 1250        | mRNA    | 0.8665        | 0.1539        | 4.44E-11     |
| MBSmRN | Lasso (no protein)* | 1250        | mRNA    | 0.8665        | 0.0771        | 2.97E-11     |
| MMHC   | Lasso               | 1250        | mRNA    | 0.8154        | 0.1539        | 6.01E-11     |
| MBSmRN | MMHC                | 250         | mRNA    | 0.8438        | 0.7688        | 0.022792412  |
| MBSmRN | Lasso               | 250         | mRNA    | 0.8438        | 0.3872        | 8.30E-08     |
| MBSmRN | Lasso (no protein)  | 250         | mRNA    | 0.8438        | 0.1664        | 9.91E-11     |
| MMHC   | Lasso               | 250         | mRNA    | 0.7688        | 0.3872        | 1.59E-07     |
| MBSmRN | MMHC                | 50          | mRNA    | 0.6566        | 0.5394        | 0.067823     |
| MBSmRN | Lasso               | 50          | mRNA    | 0.6566        | 0.3899        | 2.11E-05     |
| MBSmRN | Lasso (no protein)  | 50          | mRNA    | 0.6566        | 0.1743        | 9.30E-11     |
| MMHC   | Lasso               | 50          | mRNA    | 0.5394        | 0.3899        | 0.000615181  |
| MBSNIG | MMHC                | 1250        | Protein | 0.9861        | 0.5952        | 5.63E-11     |
| MBSNIG | Lasso               | 1250        | Protein | 0.9861        | 0.1531        | 2.64E-12     |
| MBSNIG | Lasso (no protein)  | 1250        | Protein | 0.9861        | 0.0444        | 2.36E-12     |
| MMHC   | Lasso               | 1250        | Protein | 0.5952        | 0.1531        | 3.32E-06     |
| MBSNIG | MMHC                | 250         | Protein | 0.9875        | 0.5591        | 2.30E-11     |
| MBSNIG | Lasso               | 250         | Protein | 0.9875        | 0.2980        | 3.50E-11     |
| MBSNIG | Lasso (no protein)  | 250         | Protein | 0.9875        | 0.0386        | 6.44E-12     |
| MMHC   | Lasso               | 250         | Protein | 0.5591        | 0.2980        | 0.000690063  |
| MBSNIG | MMHC                | 50          | Protein | 0.8757        | 0.3251        | 1.29E-08     |
| MBSNIG | Lasso               | 50          | Protein | 0.8757        | 0.3446        | 5.39E-09     |
| MBSNIG | Lasso (no protein)  | 50          | Protein | 0.8757        | 0.0530        | 3.94E-11     |
| MMHC   | Lasso               | 50          | Protein | 0.3251        | 0.3446        | 0.641168504  |

\*Lasso algorithm is applied to simulation data with the protein data removed.

**Table S2A.** Comparison of the area under precision-recall curve (AUPRC) of competing regulatory network learning algorithms for the second simulated network. Mean.auprc.1 and mean.auprc.2 are the average of AUPRC over 30 target mRNAs/proteins for the first and the second algorithm, respectively.

| Alg1   | Alg2                | Sample size | Target  | mean.auprc.1 | mean.auprc.2 | wilcox.pval |
|--------|---------------------|-------------|---------|--------------|--------------|-------------|
| MBSmRN | MMHC                | 1250        | mRNA    | 0.844367286  | 0.687050253  | 0.00185612  |
| MBSmRN | Lasso               | 1250        | mRNA    | 0.844367286  | 0.139583485  | 2.86E-10    |
| MBSmRN | Lasso (no protein)* | 1250        | mRNA    | 0.844367286  | 0.066141833  | 4.48E-11    |
| MMHC   | Lasso               | 1250        | mRNA    | 0.687050253  | 0.139583485  | 1.61E-10    |
| MBSmRN | MMHC                | 250         | mRNA    | 0.792800043  | 0.596652203  | 0.000690657 |
| MBSmRN | Lasso               | 250         | mRNA    | 0.792800043  | 0.384771683  | 5.67E-08    |
| MBSmRN | Lasso (no protein)  | 250         | mRNA    | 0.792800043  | 0.128665779  | 3.14E-10    |
| MMHC   | Lasso               | 250         | mRNA    | 0.596652203  | 0.384771683  | 0.000237324 |
| MBSmRN | MMHC                | 50          | mRNA    | 0.594870473  | 0.481001698  | 0.166824911 |
| MBSmRN | Lasso               | 50          | mRNA    | 0.594870473  | 0.346552738  | 0.000553939 |
| MBSmRN | Lasso (no protein)  | 50          | mRNA    | 0.594870473  | 0.144111929  | 4.58E-09    |
| MMHC   | Lasso               | 50          | mRNA    | 0.481001698  | 0.346552738  | 0.043498901 |
| MBSNIG | MMHC                | 1250        | Protein | 1            | 0.576072364  | 4.56E-12    |
| MBSNIG | Lasso               | 1250        | Protein | 1            | 0.154725404  | 1.21E-12    |
| MBSNIG | Lasso (no protein)  | 1250        | Protein | 1            | 0.045268633  | 1.21E-12    |
| MMHC   | Lasso               | 1250        | Protein | 0.576072364  | 0.154725404  | 5.96E-05    |
| MBSNIG | MMHC                | 250         | Protein | 0.983686949  | 0.549144412  | 4.62E-11    |
| MBSNIG | Lasso               | 250         | Protein | 0.983686949  | 0.303488177  | 4.32E-12    |
| MBSNIG | Lasso (no protein)  | 250         | Protein | 0.983686949  | 0.041289413  | 4.11E-12    |
| MMHC   | Lasso               | 250         | Protein | 0.549144412  | 0.303488177  | 0.000951139 |
| MBSNIG | MMHC                | 50          | Protein | 0.917802322  | 0.312819747  | 4.46E-10    |
| MBSNIG | Lasso               | 50          | Protein | 0.917802322  | 0.390030886  | 2.31E-10    |
| MBSNIG | Lasso (no protein)  | 50          | Protein | 0.917802322  | 0.04166279   | 2.87E-11    |
| MMHC   | Lasso               | 50          | Protein | 0.312819747  | 0.390030886  | 0.386842392 |

\*Lasso algorithm is applied to simulation data with the protein data removed.

**Table S2B.** Comparison of pAUC of competing regulatory network learning algorithms for the second simulated network.

| Alg1   | Alg2                | Sample size | Target  | mean.pauc.1 | mean.pauc.2 | wilcox.pval |
|--------|---------------------|-------------|---------|-------------|-------------|-------------|
| MBSmRN | MMHC                | 1250        | mRNA    | 0.916043085 | 0.801152132 | 0.001068913 |
| MBSmRN | Lasso               | 1250        | mRNA    | 0.916043085 | 0.580066896 | 1.94E-10    |
| MBSmRN | Lasso (no protein)* | 1250        | mRNA    | 0.916043085 | 0.521359744 | 1.95E-11    |
| MMHC   | Lasso               | 1250        | mRNA    | 0.801152132 | 0.580066896 | 5.89E-09    |
| MBSmRN | MMHC                | 250         | mRNA    | 0.886196856 | 0.750093235 | 0.000137573 |
| MBSmRN | Lasso               | 250         | mRNA    | 0.886196856 | 0.796880906 | 0.00313111  |
| MBSmRN | Lasso (no protein)  | 250         | mRNA    | 0.886196856 | 0.572378832 | 1.28E-10    |
| MMHC   | Lasso               | 250         | mRNA    | 0.750093235 | 0.796880906 | 0.102168908 |
| MBSmRN | MMHC                | 50          | mRNA    | 0.775059337 | 0.676538493 | 0.031399625 |
| MBSmRN | Lasso               | 50          | mRNA    | 0.775059337 | 0.8443569   | 0.116738874 |
| MBSmRN | Lasso (no protein)  | 50          | mRNA    | 0.775059337 | 0.61811706  | 0.000116194 |
| MMHC   | Lasso               | 50          | mRNA    | 0.676538493 | 0.8443569   | 3.57E-05    |
| MBSNIG | MMHC                | 1250        | Protein | 1           | 0.728173664 | 5.73E-11    |
| MBSNIG | Lasso               | 1250        | Protein | 1           | 0.595003729 | 1.65E-11    |
| MBSNIG | Lasso (no protein)  | 1250        | Protein | 1           | 0.505969491 | 1.21E-12    |
| MMHC   | Lasso               | 1250        | Protein | 0.728173664 | 0.595003729 | 0.000495308 |
| MBSNIG | MMHC                | 250         | Protein | 0.996668333 | 0.693595057 | 1.42E-11    |
| MBSNIG | Lasso               | 250         | Protein | 0.996668333 | 0.746508951 | 1.96E-11    |
| MBSNIG | Lasso (no protein)  | 250         | Protein | 0.996668333 | 0.499793313 | 2.23E-12    |
| MMHC   | Lasso               | 250         | Protein | 0.693595057 | 0.746508951 | 0.286850656 |
| MBSNIG | MMHC                | 50          | Protein | 0.959052131 | 0.597161467 | 8.54E-11    |
| MBSNIG | Lasso               | 50          | Protein | 0.959052131 | 0.830898745 | 4.23E-06    |
| MBSNIG | Lasso (no protein)  | 50          | Protein | 0.959052131 | 0.50029106  | 1.61E-12    |
| MMHC   | Lasso               | 50          | Protein | 0.597161467 | 0.830898745 | 2.46E-08    |

\*Lasso algorithm is applied to simulation data with the protein data removed.

**Table S3A.** Comparison of the area under precision-recall curve (AUPRC) of competing regulatory network learning algorithms for the third simulated network. Mean.auprc.1 and mean.auprc.2 are the average of AUPRC over 30 target mRNAs/proteins for the first and the second algorithm, respectively.

| Alg1   | Alg2                | Sample size | Target  | mean.auprc.1 | mean.auprc.2 | wilcox.pval |
|--------|---------------------|-------------|---------|--------------|--------------|-------------|
| MBSmRN | MMHC                | 1250        | mRNA    | 0.837204491  | 0.747209953  | 0.029144888 |
| MBSmRN | Lasso               | 1250        | mRNA    | 0.837204491  | 0.167312506  | 2.15E-10    |
| MBSmRN | Lasso (no protein)* | 1250        | mRNA    | 0.837204491  | 0.070872442  | 3.01E-11    |
| MMHC   | Lasso               | 1250        | mRNA    | 0.747209953  | 0.167312506  | 9.71E-10    |
| MBSmRN | MMHC                | 250         | mRNA    | 0.793194346  | 0.641743688  | 0.002748844 |
| MBSmRN | Lasso               | 250         | mRNA    | 0.793194346  | 0.388817302  | 4.52E-06    |
| MBSmRN | Lasso (no protein)  | 250         | mRNA    | 0.793194346  | 0.127966085  | 1.09E-10    |
| MMHC   | Lasso               | 250         | mRNA    | 0.641743688  | 0.388817302  | 0.000103444 |
| MBSmRN | MMHC                | 50          | mRNA    | 0.580239624  | 0.501897648  | 0.198338863 |
| MBSmRN | Lasso               | 50          | mRNA    | 0.580239624  | 0.353748549  | 0.00011031  |
| MBSmRN | Lasso (no protein)  | 50          | mRNA    | 0.580239624  | 0.140191024  | 1.99E-10    |
| MMHC   | Lasso               | 50          | mRNA    | 0.501897648  | 0.353748549  | 0.004846558 |
| MBSNIG | MMHC                | 1250        | Protein | 0.991666667  | 0.498667785  | 1.20E-11    |
| MBSNIG | Lasso               | 1250        | Protein | 0.991666667  | 0.191384574  | 7.71E-12    |
| MBSNIG | Lasso (no protein)  | 1250        | Protein | 0.991666667  | 0.046505692  | 1.72E-12    |
| MMHC   | Lasso               | 1250        | Protein | 0.498667785  | 0.191384574  | 0.004961709 |
| MBSNIG | MMHC                | 250         | Protein | 0.999410383  | 0.425016014  | 4.07E-12    |
| MBSNIG | Lasso               | 250         | Protein | 0.999410383  | 0.262977428  | 4.07E-12    |
| MBSNIG | Lasso (no protein)  | 250         | Protein | 0.999410383  | 0.046514062  | 4.11E-12    |
| MMHC   | Lasso               | 250         | Protein | 0.425016014  | 0.262977428  | 0.111847353 |
| MBSNIG | MMHC                | 50          | Protein | 0.915541611  | 0.293945755  | 9.16E-10    |
| MBSNIG | Lasso               | 50          | Protein | 0.915541611  | 0.32938974   | 1.25E-09    |
| MBSNIG | Lasso (no protein)  | 50          | Protein | 0.915541611  | 0.039328461  | 3.24E-11    |
| MMHC   | Lasso               | 50          | Protein | 0.293945755  | 0.32938974   | 0.276748316 |

\*Lasso algorithm is applied to simulation data with the protein data removed.

**Table S3B.** Comparison of pAUC of competing regulatory network learning algorithms for the third simulated network.

| Alg1   | Alg2                | Sample size | Target  | mean.pauc.1 | mean.pauc.2 | wilcox.pval |
|--------|---------------------|-------------|---------|-------------|-------------|-------------|
| MBSmRN | MMHC                | 1250        | mRNA    | 0.909356972 | 0.812055509 | 0.003903093 |
| MBSmRN | Lasso               | 1250        | mRNA    | 0.909356972 | 0.595459819 | 6.77E-09    |
| MBSmRN | Lasso (no protein)* | 1250        | mRNA    | 0.909356972 | 0.524087753 | 2.50E-11    |
| MMHC   | Lasso               | 1250        | mRNA    | 0.812055509 | 0.595459819 | 9.45E-08    |
| MBSmRN | MMHC                | 250         | mRNA    | 0.879990771 | 0.74376233  | 0.000369427 |
| MBSmRN | Lasso               | 250         | mRNA    | 0.879990771 | 0.794742399 | 0.007528166 |
| MBSmRN | Lasso (no protein)  | 250         | mRNA    | 0.879990771 | 0.570701057 | 3.05E-10    |
| MMHC   | Lasso               | 250         | mRNA    | 0.74376233  | 0.794742399 | 0.175490377 |
| MBSmRN | MMHC                | 50          | mRNA    | 0.779038967 | 0.676536527 | 0.004421149 |
| MBSmRN | Lasso               | 50          | mRNA    | 0.779038967 | 0.816709174 | 0.188089204 |
| MBSmRN | Lasso (no protein)  | 50          | mRNA    | 0.779038967 | 0.591866775 | 5.92E-07    |
| MMHC   | Lasso               | 50          | mRNA    | 0.676536527 | 0.816709174 | 7.86E-05    |
| MBSNIG | MMHC                | 1250        | Protein | 0.998526378 | 0.677972481 | 9.81E-11    |
| MBSNIG | Lasso               | 1250        | Protein | 0.998526378 | 0.610856144 | 6.92E-12    |
| MBSNIG | Lasso (no protein)  | 1250        | Protein | 0.998526378 | 0.50683179  | 1.71E-12    |
| MMHC   | Lasso               | 1250        | Protein | 0.677972481 | 0.610856144 | 0.060343623 |
| MBSNIG | MMHC                | 250         | Protein | 1           | 0.646041773 | 1.64E-11    |
| MBSNIG | Lasso               | 250         | Protein | 1           | 0.716196736 | 4.53E-12    |
| MBSNIG | Lasso (no protein)  | 250         | Protein | 1           | 0.507128069 | 1.13E-12    |
| MMHC   | Lasso               | 250         | Protein | 0.646041773 | 0.716196736 | 0.093227023 |
| MBSNIG | MMHC                | 50          | Protein | 0.957748939 | 0.594169156 | 2.46E-10    |
| MBSNIG | Lasso               | 50          | Protein | 0.957748939 | 0.835231458 | 2.51E-06    |
| MBSNIG | Lasso (no protein)  | 50          | Protein | 0.957748939 | 0.498304919 | 2.56E-12    |
| MMHC   | Lasso               | 50          | Protein | 0.594169156 | 0.835231458 | 4.16E-08    |

\*Lasso algorithm is applied to simulation data with the protein data removed.

**Table S4A.** Comparison of the area under precision-recall curve (AUPRC) of competing regulatory network learning algorithms for the fourth simulated network. Mean.auprc.1 and mean.auprc.2 are the average of AUPRC over 30 target mRNAs/proteins for the first and the second algorithm, respectively.

| Alg1   | Alg2                | Sample size | Target  | mean.auprc.1 | mean.auprc.2 | wilcox.pval |
|--------|---------------------|-------------|---------|--------------|--------------|-------------|
| MBSmRN | MMHC                | 1250        | mRNA    | 0.833701484  | 0.729567143  | 0.040575476 |
| MBSmRN | Lasso               | 1250        | mRNA    | 0.833701484  | 0.239770514  | 7.41E-09    |
| MBSmRN | Lasso (no protein)* | 1250        | mRNA    | 0.833701484  | 0.087052624  | 3.02E-11    |
| MMHC   | Lasso               | 1250        | mRNA    | 0.729567143  | 0.239770514  | 3.33E-08    |
| MBSmRN | MMHC                | 250         | mRNA    | 0.796255368  | 0.698437644  | 0.072441629 |
| MBSmRN | Lasso               | 250         | mRNA    | 0.796255368  | 0.482132786  | 6.04E-06    |
| MBSmRN | Lasso (no protein)  | 250         | mRNA    | 0.796255368  | 0.19516312   | 1.61E-10    |
| MMHC   | Lasso               | 250         | mRNA    | 0.698437644  | 0.482132786  | 0.000376261 |
| MBSmRN | MMHC                | 50          | mRNA    | 0.515499705  | 0.335441548  | 0.020226324 |
| MBSmRN | Lasso               | 50          | mRNA    | 0.515499705  | 0.480570475  | 0.520121422 |
| MBSmRN | Lasso (no protein)  | 50          | mRNA    | 0.515499705  | 0.250238284  | 0.000144901 |
| MMHC   | Lasso               | 50          | mRNA    | 0.335441548  | 0.480570475  | 0.087609064 |
| MBSNIG | MMHC                | 1250        | Protein | 0.977121795  | 0.54707146   | 2.90E-10    |
| MBSNIG | Lasso               | 1250        | Protein | 0.977121795  | 0.294424398  | 1.60E-10    |
| MBSNIG | Lasso (no protein)  | 1250        | Protein | 0.977121795  | 0.052802736  | 4.11E-12    |
| MMHC   | Lasso               | 1250        | Protein | 0.54707146   | 0.294424398  | 0.009874172 |
| MBSNIG | MMHC                | 250         | Protein | 0.971782242  | 0.451735429  | 5.05E-10    |
| MBSNIG | Lasso               | 250         | Protein | 0.971782242  | 0.463484962  | 3.82E-09    |
| MBSNIG | Lasso (no protein)  | 250         | Protein | 0.971782242  | 0.044494787  | 1.10E-11    |
| MMHC   | Lasso               | 250         | Protein | 0.451735429  | 0.463484962  | 0.870753838 |
| MBSNIG | MMHC                | 50          | Protein | 0.844089842  | 0.25877698   | 1.13E-08    |
| MBSNIG | Lasso               | 50          | Protein | 0.844089842  | 0.540945243  | 0.000241704 |
| MBSNIG | Lasso (no protein)  | 50          | Protein | 0.844089842  | 0.035957453  | 3.11E-11    |
| MMHC   | Lasso               | 50          | Protein | 0.25877698   | 0.540945243  | 0.000521047 |

\*Lasso algorithm is applied to simulation data with the protein data removed.

**Table S4B.** Comparison of pAUC of competing regulatory network learning algorithms for the fourth simulated network.

| Alg1   | Alg2                | Sample size | Target  | mean.pauc.1 | mean.pauc.2 | wilcox.pval |
|--------|---------------------|-------------|---------|-------------|-------------|-------------|
| MBSmRN | MMHC                | 1250        | mRNA    | 0.912956241 | 0.826791542 | 0.015179283 |
| MBSmRN | Lasso               | 1250        | mRNA    | 0.912956241 | 0.613980913 | 1.29E-08    |
| MBSmRN | Lasso (no protein)* | 1250        | mRNA    | 0.912956241 | 0.525134167 | 2.11E-11    |
| MMHC   | Lasso               | 1250        | mRNA    | 0.826791542 | 0.613980913 | 7.79E-07    |
| MBSmRN | MMHC                | 250         | mRNA    | 0.881315776 | 0.788357107 | 0.004937004 |
| MBSmRN | Lasso               | 250         | mRNA    | 0.881315776 | 0.766642086 | 0.00262161  |
| MBSmRN | Lasso (no protein)  | 250         | mRNA    | 0.881315776 | 0.596813524 | 5.28E-09    |
| MMHC   | Lasso               | 250         | mRNA    | 0.788357107 | 0.766642086 | 0.491331111 |
| MBSmRN | MMHC                | 50          | mRNA    | 0.737974895 | 0.613277184 | 0.001592329 |
| MBSmRN | Lasso               | 50          | mRNA    | 0.737974895 | 0.78276361  | 0.155649239 |
| MBSmRN | Lasso (no protein)  | 50          | mRNA    | 0.737974895 | 0.634520986 | 0.001989519 |
| MMHC   | Lasso               | 50          | mRNA    | 0.613277184 | 0.78276361  | 8.85E-06    |
| MBSNIG | MMHC                | 1250        | Protein | 0.992708414 | 0.706977076 | 3.02E-10    |
| MBSNIG | Lasso               | 1250        | Protein | 0.992708414 | 0.651354833 | 6.69E-11    |
| MBSNIG | Lasso (no protein)  | 1250        | Protein | 0.992708414 | 0.509314822 | 2.36E-12    |
| MMHC   | Lasso               | 1250        | Protein | 0.706977076 | 0.651354833 | 0.099130811 |
| MBSNIG | MMHC                | 250         | Protein | 0.98809791  | 0.685125291 | 1.51E-09    |
| MBSNIG | Lasso               | 250         | Protein | 0.98809791  | 0.754808053 | 1.63E-09    |
| MBSNIG | Lasso (no protein)  | 250         | Protein | 0.98809791  | 0.501330315 | 2.23E-12    |
| MMHC   | Lasso               | 250         | Protein | 0.685125291 | 0.754808053 | 0.149018815 |
| MBSNIG | MMHC                | 50          | Protein | 0.918675589 | 0.599782406 | 2.10E-09    |
| MBSNIG | Lasso               | 50          | Protein | 0.918675589 | 0.822716337 | 0.001355217 |
| MBSNIG | Lasso (no protein)  | 50          | Protein | 0.918675589 | 0.499216659 | 6.62E-12    |
| MMHC   | Lasso               | 50          | Protein | 0.599782406 | 0.822716337 | 4.36E-07    |

\*Lasso algorithm is applied to simulation data with the protein data removed.

**Table S5.** Direct regulators of the 78 proteins, and proteins regulated by the 78 proteins. Frequency column represents, out of the 35 resampled data sets, the number of times a miRNA/mRNA/protein was identified as a directed regulator of the target protein, or regulated by the target protein.

| Protein        | Regulators of the protein |                |               |                | Proteins regulated |           |              |    |
|----------------|---------------------------|----------------|---------------|----------------|--------------------|-----------|--------------|----|
|                | Name                      | Coef           | p value       | Frequency      | Name               | Frequency |              |    |
| <b>MYOF</b>    | 1                         | mRNA           | 0.0815572234  | 8.86787577E-03 | 35                 | 1         | MLEC         | 7  |
|                | 2                         | EIF3E          | -0.1879059639 | 2.72807071E-29 | 18                 | 2         | TFRC         | 7  |
|                | 3                         | MAPK1          | -0.1080779714 | 1.86441155E-09 | 14                 | 3         | CBR1         | 6  |
|                | 4                         | PA2G4          | -0.2659352065 | 2.65183687E-15 | 12                 | 4         | HNRNPH2      | 4  |
|                | 5                         | KRT36          | -0.0654534516 | 2.10694466E-04 | 8                  | 5         | MAPK1        | 4  |
|                | 6                         | CNDP2          | -0.4002374664 | 1.76690420E-09 | 7                  | 6         | CNDP2        | 3  |
|                | 7                         | RPL11          | -0.1139841598 | 1.20012661E-04 | 5                  | 7         | KRT36        | 3  |
|                | 8                         | HMGB1          | -0.0717072684 | 1.35506566E-03 | 4                  | 8         | PPP1CB       | 3  |
|                | 9                         | RPL12          | -0.0876555220 | 3.61749008E-06 | 3                  |           |              |    |
| <b>HSP90B1</b> | 1                         | mRNA           | 0.1144337635  | 2.83406231E-20 | 35                 | 1         | CALU         | 10 |
|                | 2                         | hsa-miR-16-5p  | -0.4214643505 | 1.76412677E-12 | 19                 | 2         | NAP1L1       | 6  |
|                | 3                         | PDIA3          | 0.4483435085  | 4.86015251E-10 | 15                 | 3         | NUFIP2       | 3  |
|                | 4                         | AHSA1          | 0.1498572686  | 5.08236298E-09 | 13                 | 4         | PCCB         | 3  |
|                | 5                         | NUFIP2         | -0.1004221486 | 1.66188966E-06 | 9                  | 5         | SFRS2        | 3  |
|                | 6                         | CCDC109A       | -0.1342064691 | 3.58896107E-08 | 7                  |           |              |    |
|                | 7                         | RFC2           | -0.1027720078 | 1.85849409E-07 | 6                  |           |              |    |
|                | 8                         | TMEM205        | 0.0733018240  | 1.56119797E-05 | 5                  |           |              |    |
|                | 9                         | HELZ           | -0.0700825872 | 1.00786626E-03 | 3                  |           |              |    |
| <b>GAPDH</b>   | 1                         | LDHA           | 0.2671780480  | 9.73920226E-16 | 35                 | 1         | KIAA1967     | 13 |
|                | 2                         | mRNA           | -0.0842908412 | 8.56309792E-06 | 35                 | 2         | ANO6         | 11 |
|                | 3                         | SLK            | -0.1036343313 | 3.34828308E-09 | 21                 | 3         | TCEB1        | 10 |
|                | 4                         | ANO6           | -0.0724502447 | 1.76733857E-03 | 5                  | 4         | MAN2A1       | 7  |
|                | 5                         | XPNPEP1        | -0.0819605783 | 6.84026714E-07 | 5                  | 5         | RPL11        | 6  |
|                | 6                         | GBE1           | -0.0935472162 | 6.24720685E-07 | 3                  | 6         | SLK          | 5  |
|                |                           |                |               |                | 7                  | CLINT1    | 4            |    |
|                |                           |                |               |                | 8                  | HSP90AA2  | 4            |    |
|                |                           |                |               |                | 9                  | PSMA6     | 4            |    |
| <b>ANXA1</b>   | 1                         | mRNA           | 0.0837140259  | 4.60375103E-07 | 35                 | 1         | IMMT         | 11 |
|                | 2                         | KRT19          | 0.3966387205  | 2.05113104E-12 | 13                 | 2         | SERPINC1     | 5  |
|                | 3                         | EEF1A1         | 0.4833784697  | 5.57132963E-13 | 9                  | 3         | TRIM28       | 4  |
|                | 4                         | IMMT           | -0.1086729173 | 7.19893619E-07 | 9                  | 4         | DYNC1H1      | 3  |
|                | 5                         | HBB            | 0.0626614343  | 1.16049138E-04 | 8                  |           |              |    |
|                | 6                         | RPL5           | 0.1321089286  | 6.29706327E-14 | 6                  |           |              |    |
|                | 7                         | TRIM28         | -0.1362573841 | 5.54116051E-09 | 6                  |           |              |    |
|                | 8                         | hsa-miR-1181   | 0.1956745883  | 2.45793188E-22 | 4                  |           |              |    |
|                | 9                         | TUBA1B         | 0.1505232777  | 2.88711994E-35 | 4                  |           |              |    |
|                | 10                        | ATP12A         | 0.0794413107  | 1.84528810E-04 | 3                  |           |              |    |
|                | 11                        | GLB1           | -0.0480078471 | 3.03804590E-03 | 3                  |           |              |    |
|                | 12                        | hsa-miR-335-3p | -0.1208153389 | 5.02437824E-08 | 3                  |           |              |    |
| <b>HSPA5</b>   | 1                         | mRNA           | 0.0681977392  | 5.23199323E-05 | 35                 | 1         | hsa-miR-1288 | 7  |
|                | 2                         | treat          | NA            | NA             | 14                 | 2         | EIF5         | 6  |
|                | 3                         | FN1            | 0.0795169477  | 5.31884740E-19 | 11                 | 3         | APOA1BP      | 3  |
|                | 4                         | hsa-miR-574-3p | -0.1745664839 | 3.31005580E-08 | 7                  | 4         | SYPL1        | 3  |
|                | 5                         | HSP90B1        | 0.2612262098  | 1.96831481E-08 | 6                  |           |              |    |
|                | 6                         | PDIA3          | 0.3918100415  | 4.52465212E-08 | 6                  |           |              |    |
|                | 7                         | hsa-miR-1290   | 0.1200841333  | 1.20296983E-15 | 3                  |           |              |    |
| <b>HADHA</b>   | 1                         | mRNA           | -0.0986614562 | 1.75051637E-01 | 35                 | 1         | DARS         | 20 |
|                | 2                         | GLDC           | 0.1375431550  | 1.06205160E-12 | 16                 | 2         | DBT          | 8  |
|                | 3                         | HSPB1          | -0.1300581266 | 6.89406751E-10 | 9                  | 3         | INF2         | 4  |
|                | 4                         | DARS           | 0.2146324328  | 8.64707300E-13 | 5                  | 4         | GLDC         | 3  |
|                | 5                         | hsa-miR-1471   | 0.1354277749  | 5.64976467E-06 | 5                  |           |              |    |
|                | 6                         | hsa-miR-335-3p | 0.1201677155  | 1.26706461E-04 | 4                  |           |              |    |
|                | 7                         | hsa-miR-345-5p | 0.1635967996  | 1.88792261E-06 | 4                  |           |              |    |
|                | 8                         | TIMP3          | -0.0796698502 | 1.99820770E-04 | 4                  |           |              |    |
|                | 9                         | APEH           | 0.1745968162  | 3.43989029E-08 | 3                  |           |              |    |
|                | 10                        | PPAP2B         | -0.1807341302 | 3.14868482E-09 | 3                  |           |              |    |



| Protein          | Regulators of the protein |                |                 |                 | Proteins regulated |           |
|------------------|---------------------------|----------------|-----------------|-----------------|--------------------|-----------|
|                  | Name                      | Coef           | p value         | Frequency       | Name               | Frequency |
| ENO1             | 1 mRNA                    | 0.0544383793   | 1.57255502E-03  | 35              | 1 RPL18            | 13        |
|                  | 2 KRT19                   | 0.3806624789   | 9.65525422E-14  | 32              | 2 AP1G2            | 12        |
| IDH1             |                           |                |                 |                 | 3 LGALS12          | 9         |
|                  |                           |                |                 |                 | 4 PGK1             | 8         |
|                  |                           |                |                 |                 | 5 TEX10            | 7         |
|                  |                           |                |                 |                 | 6 PKM2             | 5         |
|                  |                           |                |                 |                 | 7 IDH2             | 3         |
|                  |                           |                |                 |                 | 8 RAD50            | 3         |
|                  | 1 mRNA                    | 0.0033442229   | 7.11933160E-01  | 35              | 1 hsa-miR-10a-5p   | 18        |
|                  | 2 DSP                     | 0.1115783142   | 1.47414634E-13  | 21              | 2 MAGEA10          | 18        |
| 3 hsa-miR-10a-5p | 0.3494282011              | 1.03882583E-13 | 10              | 3 ACADVL        | 3                  |           |
|                  |                           |                |                 | 4 hsa-miR-17-5p | 3                  |           |
|                  |                           |                |                 | 5 NAV2          | 3                  |           |
| ACTN1            | 1 mRNA                    | 0.0152804061   | 6.24350692E-01  | 35              | 1 HEXB             | 11        |
|                  | 2 ACTN4                   | 0.4422402460   | 2.35469804E-10  | 33              | 2 AHCY             | 6         |
|                  | 3 hsa-miR-34c-5p          | -0.0861697964  | 5.05825155E-03  | 6               | 3 SF3A1            | 5         |
|                  | 4 hsa-miR-148a-3p         | -0.1846897298  | 6.59998137E-04  | 5               | 4 UBR4             | 5         |
|                  | 5 METAP2                  | -0.0612033680  | 2.62826913E-02  | 5               | 5 RPL7             | 4         |
|                  | 6 OXSR1                   | -0.0548639493  | 5.40949542E-03  | 3               | 6 hsa-miR-30a-5p   | 3         |
|                  |                           |                |                 | 7 JUP           | 3                  |           |
| TFRC             | 1 mRNA                    | 0.1413550260   | 1.18562012E-15  | 35              | 1 STOM             | 8         |
|                  | 2 hsa-miR-22-3p           | 0.4318031416   | 1.07981286E-14  | 14              | 2 MYOF             | 5         |
|                  | 3 STOM                    | 0.1476035770   | 5.69680887E-08  | 11              | 3 SLC16A1          | 5         |
|                  | 4 CBR1                    | -0.1268684223  | 1.36116943E-08  | 8               | 4 ADAM22           | 3         |
|                  | 5 SLC7A5                  | 0.1880261722   | 2.09532028E-05  | 8               | 5 HSD17B1          | 3         |
|                  | 6 ADAM22                  | 0.1293657945   | 2.09841461E-04  | 6               | 6 TXNRD1           | 3         |
|                  | 7 HSPA5                   | 0.2897701089   | 2.18521722E-03  | 5               |                    |           |
|                  | 8 SAE1                    | -0.1078705965  | 8.66400562E-05  | 5               |                    |           |
|                  | 9 TXNRD1                  | 0.2129057819   | 1.12080377E-10  | 5               |                    |           |
|                  | 10 hsa-miR-365a-3p        | -0.5141975349  | 1.08468370E-06  | 4               |                    |           |
|                  | 11 HSD17B1                | 0.1668527175   | 4.32218468E-06  | 4               |                    |           |
|                  | 12 ENPEP                  | 0.1261303110   | 3.07220053E-05  | 3               |                    |           |
|                  | 13 hsa-miR-1290           | 0.1580302021   | 2.38953839E-23  | 3               |                    |           |
|                  | 14 NDUFA10                | 0.0719457175   | 4.17408814E-03  | 3               |                    |           |
|                  | 15 PDIA6                  | 0.5352731297   | 1.94776132E-06  | 3               |                    |           |
|                  | 16 PRDX5                  | -0.0984775484  | 4.04641788E-08  | 3               |                    |           |
| ACADVL           | 1 mRNA                    | 0.0531668077   | 2.27562297E-01  | 35              | 1 cDNA.FLJ61478    | 5         |
|                  | 2 ACSS1                   | 0.5224397647   | 1.81543581E-13  | 13              | 2 IDH1             | 5         |
|                  | 3 MATR3                   | -0.1184428286  | 1.07979112E-03  | 9               | 3 TARS             | 5         |
|                  | 4 PFKL                    | 0.2755952022   | 1.55993547E-11  | 8               | 4 TPM1             | 4         |
|                  | 5 HADHB                   | 0.3604684709   | 2.26541479E-12  | 6               | 5 hsa-miR-515-5p   | 3         |
|                  | 6 YWHAG                   | -0.1699196544  | 1.22872444E-03  | 3               | 6 MAGEA10          | 3         |
| ALDH7A1          | 1 mRNA                    | 0.0418645367   | 1.20007742E-02  | 35              | 1 hsa-miR-335-5p   | 19        |
|                  | 2 hsa-miR-335-5p          | 0.6224739790   | 6.71035128E-13  | 12              | 2 PSMC4            | 8         |
|                  | 3 TRAP1                   | 0.1792210049   | 5.37252027E-11  | 10              | 3 FHL2             | 7         |
|                  | 4 FHL2                    | -0.0943425664  | 9.64805018E-04  | 3               | 4 ERLIN2           | 3         |
|                  | 5 GANAB                   | 0.4810168542   | 4.53077794E-09  | 3               |                    |           |
| IDH2             | 1 mRNA                    | 0.0609456552   | 3.62342921E-02  | 35              | 1 ETFA             | 17        |
|                  | 2 GAPDH                   | 0.3756784899   | 5.27920416E-10  | 10              | 2 AP1G2            | 6         |
|                  | 3 TEX10                   | -0.1480878893  | 1.10359566E-06  | 9               | 3 HSPA9            | 6         |
|                  | 4 ETFA                    | 0.2494179122   | 1.21571568E-11  | 3               | 4 ALDH7A1          | 5         |
|                  | 5 MME                     | -0.1972734130  | 2.27491987E-11  | 3               | 5 hsa-miR-520h     | 5         |
|                  |                           |                |                 |                 | 6 ROS1             | 5         |
|                  |                           |                |                 |                 | 7 CNDP2            | 3         |
| EEF1A1           | 1 mRNA                    | -0.0755701352  | 2.42229172E-01  | 35              | 1 ANXA1            | 22        |
|                  | 2 CTNNB1                  | -0.4465795861  | 4.77289439E-13  | 16              | 2 hsa-miR-26a-5p   | 6         |
|                  | 3 GNAI1                   | 0.1393381567   | 1.35451478E-14  | 10              | 3 GNAI1            | 4         |
|                  | 4 SRRT                    | -0.1424023238  | 2.411103654E-13 | 3               |                    |           |

| Protein         | Regulators of the protein |               |                |           | Proteins regulated |           |
|-----------------|---------------------------|---------------|----------------|-----------|--------------------|-----------|
|                 | Name                      | Coef          | p value        | Frequency | Name               | Frequency |
| <b>FASN</b>     | 1 mRNA                    | -0.0496958301 | 2.30751203E-01 | 35        | 1 GLDC             | 18        |
|                 | 2 hsa-miR-519e-5p         | 1.2165717915  | 2.34290325E-43 | 30        | 2 MYH9             | 5         |
|                 | 3 HMGB1                   | -0.1384698846 | 1.80046453E-04 | 7         | 3 cDNA.FLJ53063    | 3         |
|                 | 4 COASY                   | -0.0951523696 | 2.68412527E-03 | 6         |                    |           |
|                 | 5 DYNC1H1                 | 0.2644201361  | 3.51922868E-07 | 5         |                    |           |
|                 | 6 HSD3B1                  | -0.0848101329 | 5.71147535E-05 | 4         |                    |           |
|                 | 7 MAPK3                   | -0.1100532348 | 5.90005945E-03 | 4         |                    |           |
|                 | 8 ZNF469                  | 0.1364551462  | 3.20999301E-04 | 3         |                    |           |
| <b>PDIA4</b>    | 1 mRNA                    | 0.0404743676  | 1.64186673E-02 | 35        | 1 ITGB1            | 14        |
|                 | 2 ATP5F1                  | -0.1527002994 | 2.67635342E-16 | 21        | 2 HSP90B1          | 4         |
|                 | 3 SLC26A2                 | -0.1257784549 | 3.88659481E-04 | 13        | 3 RPL17            | 3         |
|                 | 4 COMT                    | -0.1581667172 | 8.42584393E-15 | 5         | 4 RPS18            | 3         |
|                 | 5 HSP90B1                 | 0.3298207130  | 2.57915330E-05 | 4         |                    |           |
|                 | 6 ARF1                    | -0.1734599125 | 1.46416817E-13 | 3         |                    |           |
| <b>ACSS1</b>    | 1 mRNA                    | -0.0268824032 | 1.48108987E-01 | 35        | 1 CAPN6            | 31        |
|                 | 2 HADHB                   | 0.4173786187  | 1.30228117E-18 | 22        | 2 PIR              | 14        |
|                 | 3 ACO2                    | 0.2926917252  | 1.01055734E-15 | 9         | 3 HADHB            | 10        |
|                 |                           |               |                |           | 4 SEPT2            | 5         |
| <b>ACO2</b>     | 1 mRNA                    | -0.1089475235 | 2.79047010E-01 | 35        | 1 DHX15            | 6         |
|                 | 2 UPP1                    | -0.2777041754 | 2.92148009E-06 | 29        | 2 HNRNPR           | 5         |
|                 | 3 ERO1L                   | 0.1303808913  | 5.06158761E-06 | 18        | 3 hsa-miR-27a-3p   | 4         |
|                 | 4 KRT18                   | -1.0542986534 | 2.31924139E-06 | 14        |                    |           |
|                 | 5 hsa-miR-27a-3p          | -0.6478561718 | 1.72335640E-05 | 9         |                    |           |
|                 | 6 TECR                    | 0.1985343436  | 7.71390614E-05 | 7         |                    |           |
|                 | 7 ATP6                    | 0.1597689212  | 1.55944877E-02 | 3         |                    |           |
|                 | 8 DAB2                    | -0.1314805261 | 8.13229802E-04 | 3         |                    |           |
| <b>HADHB</b>    | 1 mRNA                    | 0.2674943482  | 7.70136074E-02 | 35        | 1 hsa-miR-519c-3p  | 9         |
|                 | 2 ACSS1                   | 0.9534563822  | 2.28809668E-17 | 25        | 2 ACSS1            | 8         |
|                 | 3 hsa-miR-22-3p           | -0.8001554882 | 1.52682372E-17 | 4         | 3 HSP90AB3P        | 7         |
|                 | 4 hsa-miR-29a-3p          | -0.8112268556 | 1.74762843E-18 | 3         | 4 hsa-miR-21-5p    | 6         |
|                 |                           |               |                |           | 5 TPP1             | 6         |
|                 |                           |               |                |           | 6 RAB1A            | 4         |
|                 |                           |               |                |           | 7 hsa-miR-512-3p   | 3         |
|                 |                           |               |                |           | 8 hsa-miR-622      | 3         |
|                 |                           |               |                |           | 9 NANS             | 3         |
| <b>RASA1</b>    | 1 mRNA                    | 0.1430729319  | 8.59812767E-10 | 35        | 1 GPI              | 30        |
|                 | 2 PHB                     | -0.3433707530 | 1.68494807E-16 | 25        | 2 ALDOA            | 15        |
|                 | 3 cDNA.FLJ34775.fis       | 0.0970781651  | 3.37158608E-02 | 6         | 3 APOA1BP          | 3         |
|                 | 4 SLC25A11                | -0.1912490531 | 6.61284343E-15 | 5         |                    |           |
|                 | 5 VTN                     | -0.0816510773 | 3.02468290E-02 | 3         |                    |           |
| <b>HSD17B10</b> | 1 mRNA                    | -0.0738003556 | 6.68477513E-01 | 35        | 1 CYB5B            | 12        |
|                 | 2 ACTN1                   | -1.1678869351 | 2.45898821E-08 | 31        | 2 KIAA0776         | 7         |
|                 | 3 IDH3B                   | 0.2372811537  | 5.78429744E-04 | 14        | 3 SARS             | 7         |
|                 | 4 HIBCH                   | 0.2956851913  | 1.18138915E-14 | 4         | 4 HIBCH            | 6         |
|                 | 5 HIBADH                  | 0.2369486207  | 1.08428922E-03 | 3         | 5 cDNA.FLJ54153    | 4         |
|                 | 6 PCNA                    | 0.1440946519  | 4.36374257E-03 | 3         | 6 ARPC1B           | 3         |
|                 |                           |               |                |           | 7 EEF2             | 3         |
|                 |                           |               |                |           | 8 PDXK             | 3         |
| <b>PARP1</b>    | 1 mRNA                    | 0.0460965696  | 2.22902900E-01 | 35        | 1 GLDC             | 18        |
|                 | 2 GLDC                    | 0.2760016317  | 8.75024132E-18 | 17        | 2 hsa-miR-1260a    | 13        |
|                 | 3 MYH10                   | 0.4348203130  | 4.69564768E-13 | 14        | 3 NDUFB10          | 7         |
| <b>EGFR</b>     | 1 mRNA                    | 0.1175307528  | 2.63026829E-03 | 35        | 1 FAM129B          | 11        |
|                 | 2 hsa-miR-30a-5p          | -0.8056092306 | 7.77913007E-11 | 13        | 2 hsa-miR-210      | 9         |
|                 | 3 CD63                    | 0.1560160681  | 2.11641443E-09 | 10        | 3 BCL11B           | 4         |
|                 | 4 GBP1                    | 0.1010137374  | 1.49735859E-03 | 10        | 4 EZR              | 4         |
|                 | 5 TFRC                    | 0.3188186996  | 1.20703454E-10 | 7         | 5 hsa-miR-141-3p   | 4         |
|                 |                           |               |                |           | 6 hsa-miR-25-3p    | 3         |
|                 |                           |               |                |           | 7 ITGB1            | 3         |
|                 |                           |               |                |           | 8 MYOF             | 3         |
|                 |                           |               |                |           | 9 SERPINB1         | 3         |

| Protein      | Regulators of the protein |                |                |                | Proteins regulated |                  |                 |    |
|--------------|---------------------------|----------------|----------------|----------------|--------------------|------------------|-----------------|----|
|              | Name                      | Coef           | p value        | Frequency      | Name               | Frequency        |                 |    |
| <b>ALDOA</b> | 1                         | mRNA           | 0.1244827010   | 6.05590124E-04 | 35                 | 1                | GCN1L1          | 8  |
|              | 2                         | ISYNA1         | 0.3004531368   | 1.47734191E-06 | 20                 | 2                | MACF1           | 6  |
|              | 3                         | LETM1          | -0.1105990758  | 6.63898524E-04 | 5                  | 3                | RASA1           | 6  |
|              | 4                         | COL7A1         | -0.1026771697  | 3.57474154E-03 | 3                  | 4                | DNM1L           | 5  |
|              | 5                         | MACF1          | -0.1177171934  | 5.99326040E-04 | 3                  | 5                | EHMT2           | 5  |
|              | 6                         | VAMP8          | 0.1607317275   | 1.54396084E-04 | 3                  | 6                | DYRK4           | 4  |
|              |                           |                |                |                |                    | 7                | NNT             | 4  |
|              |                           |                |                |                |                    | 8                | ZNF469          | 3  |
| <b>ECHS1</b> | 1                         | mRNA           | 0.1459916831   | 4.31903610E-02 | 35                 | 1                | hsa-miR-1280    | 13 |
|              |                           |                |                | 2.45961484E-   |                    |                  |                 |    |
|              | 2                         | ETFA           | 0.7699260246   |                | 14                 | 2                | hsa-miR-320b    | 7  |
|              | 3                         | hsa-miR-23a-3p | -1.8571731758  | 1.91304282E-07 | 6                  | 3                | AHNAK           | 3  |
|              | 4                         | hsa-miR-320b   | -1.5887239038  | 4.11226177E-08 | 5                  | 4                | hsa-miR-425-5p  | 3  |
|              | 5                         | hsa-miR-424-5p | -0.7076571858  | 6.76572454E-13 | 4                  |                  |                 |    |
|              | 6                         | KRT79          | -0.6476623805  | 1.48080248E-04 | 4                  |                  |                 |    |
|              | 7                         | GMPS           | 0.2364131236   | 1.16853661E-04 | 3                  |                  |                 |    |
|              | 8                         | NCSTN          | -0.2134978836  | 2.44722220E-03 | 3                  |                  |                 |    |
|              | 9                         | PDS5A          | 0.1861979197   | 1.84330349E-02 | 3                  |                  |                 |    |
| 10           | RANGAP1                   | -0.1606432898  | 1.64040780E-03 | 3              |                    |                  |                 |    |
| <b>TPI1</b>  | 1                         | mRNA           | 0.1726514038   | 8.09405046E-05 | 35                 | 1                | FAM115A         | 9  |
|              | 2                         | YWHAZ          | 0.6664365735   | 7.35944648E-12 | 10                 | 2                | PRDX2           | 9  |
|              | 3                         | DSTN           | 0.2264937816   | 3.23435217E-10 | 9                  | 3                | YWHAZ           | 6  |
|              | 4                         | PRDX2          | 0.2553462354   | 5.78531242E-11 | 9                  | 4                | NCLN            | 4  |
|              | 5                         | PIIB           | 0.4120198935   | 2.02797052E-09 | 3                  | 5                | GAPDH           | 3  |
|              |                           |                |                |                | 6                  | hsa-miR-29b-1-5p | 3               |    |
|              |                           |                |                |                | 7                  | hsa-miR-638      | 3               |    |
|              |                           |                |                |                | 8                  | LDHA             | 3               |    |
| <b>GPI</b>   | 1                         | mRNA           | 0.0814260047   | 1.33245863E-02 | 35                 | 1                | TMED1           | 26 |
|              | 2                         | TMED9          | 0.2516021575   | 1.17774654E-03 | 14                 | 2                | ENO1            | 25 |
|              | 3                         | ALDH9A1        | -0.0959292493  | 1.12943413E-02 | 7                  | 3                | SAMD9           | 10 |
|              |                           |                |                |                | 4                  | ATP2B1           | 4               |    |
|              |                           |                |                |                | 5                  | RASA1            | 3               |    |
|              |                           |                |                |                | 6                  | TMED9            | 3               |    |
| <b>DSP</b>   | 1                         | mRNA           | 0.8159996680   | 7.14133209E-09 | 35                 | 1                | PLEC1           | 8  |
|              | 2                         | treat          | NA             | NA             | 30                 | 2                | CYTSB           | 7  |
|              | 3                         | DAK            | -0.3554418159  | 5.53977244E-11 | 9                  | 3                | TCP1            | 7  |
|              | 4                         | DYNC1H1        | 0.6490588672   | 2.41707270E-10 | 9                  | 4                | ATP6V1B2        | 5  |
|              | 5                         | PLEC1          | 0.3364747380   | 7.37195720E-07 | 5                  |                  |                 |    |
|              | 6                         | CYTSB          | 0.4373342044   | 2.31961587E-07 | 3                  |                  |                 |    |
| <b>LDHA</b>  | 1                         | mRNA           | 0.0575468864   | 2.26748496E-02 | 35                 | 1                | GAPDH           | 9  |
|              | 2                         | PLIN2          | 0.1674816472   | 6.91790048E-09 | 18                 | 2                | TMX1            | 6  |
|              | 3                         | GAPDH          | 0.7370113392   | 1.27604025E-14 | 14                 | 3                | hsa-miR-371a-3p | 4  |
|              | 4                         | TPI1           | 0.7181842586   | 4.17501221E-15 | 12                 | 4                | IGF2BP3         | 4  |
|              | 5                         | H6PD           | -0.2593294893  | 4.20134064E-07 | 6                  | 5                | PLIN2           | 4  |
|              | 6                         | TMX1           | 0.3406989729   | 5.19207743E-12 | 5                  | 6                | AP2B1           | 3  |
|              | 7                         | AP2B1          | -0.2804601467  | 3.11336832E-05 | 4                  | 7                | BAT3            | 3  |
|              | 8                         | BLVRA          | -0.0870840556  | 1.55878763E-02 | 3                  | 8                | BLVRA           | 3  |
|              | 9                         | IDH3B          | -0.1586124954  | 2.48370812E-06 | 3                  |                  |                 |    |
| <b>HYOU1</b> | 1                         | mRNA           | 0.0736292402   | 7.84363523E-03 | 35                 | 1                | PNPLA8          | 12 |
|              | 2                         | treat          | NA             | NA             | 26                 | 2                | PGK1            | 4  |
|              | 3                         | HMOX1          | -0.2020456351  | 1.67236571E-12 | 6                  | 3                | SEPT9           | 4  |
|              | 4                         | SEPT9          | 0.4865560170   | 1.03967755E-04 | 6                  | 4                | hsa-miR-200c-3p | 3  |
|              | 5                         | RRBP1          | 0.5556417841   | 1.48628770E-15 | 5                  | 5                | LRRC1           | 3  |
|              | 6                         | AHNAK          | 0.4220999808   | 1.00214858E-13 | 4                  | 6                | PDCD10          | 3  |
|              | 7                         | hsa-miR-210    | 0.5012703881   | 1.59204636E-18 | 3                  | 7                | SPTAN1          | 3  |
|              | 8                         | hsa-miR-26a-5p | 0.8061152401   | 2.52571766E-05 | 3                  |                  |                 |    |
|              | 9                         | hsa-miR-671-5p | -0.7096326381  | 2.01549556E-11 | 3                  |                  |                 |    |

| Protein      | Regulators of the protein |               |                |           | Proteins regulated |           |
|--------------|---------------------------|---------------|----------------|-----------|--------------------|-----------|
|              | Name                      | Coef          | p value        | Frequency | Name               | Frequency |
| <b>ETFA</b>  | 1 mRNA                    | -0.0740815745 | 1.78364323E-01 | 35        | 1 hsa-miR-424-5p   | 11        |
|              | 2 MME                     | -0.5152520466 | 2.37143780E-18 | 20        | 2 ACSS1            | 6         |
|              | 3 HIST1H1A                | 0.2155921561  | 3.40177594E-03 | 14        | 3 F5               | 4         |
|              | 4 DNAJC13                 | -0.1809595850 | 4.12044993E-04 | 7         | 4 CS               | 3         |
|              | 5 ATP5O                   | 0.2743605489  | 2.45062334E-10 | 3         | 5 hsa-miR-503      | 3         |
|              | 6 DDX3X                   | -0.3089425297 | 1.03471084E-06 | 3         | 6 MAOA             | 3         |
|              | 7 GANAB                   | 1.0633877435  | 1.26628162E-13 | 3         |                    |           |
|              | 8 IDH2                    | 1.1561592158  | 6.79947149E-11 | 3         |                    |           |
| <b>PIIB</b>  | 1 mRNA                    | 0.2365730478  | 1.58055751E-06 | 35        | 1 YWHAQ            | 12        |
|              | 2 PEBP1                   | 0.4870305627  | 3.67943977E-09 | 11        | 2 PEBP1            | 5         |
|              | 3 YWHAQ                   | 0.3952413865  | 3.84415147E-11 | 7         | 3 QPRT             | 4         |
|              | 4 RAB1B                   | 0.1723804244  | 1.23308013E-04 | 5         | 4 GPD2             | 3         |
|              | 5 ENAH                    | 0.1154190288  | 2.23033036E-02 | 3         | 5 ITPR3            | 3         |
|              | 6 RPS7                    | 0.2111455179  | 2.72447475E-10 | 3         | 6 PSMD14           | 3         |
|              |                           |               |                | 7 RAB1B   | 3                  |           |
| <b>GLDC</b>  | 1 mRNA                    | -0.0075258559 | 3.13478402E-01 | 35        | 1 PARP1            | 16        |
|              | 2 HADHA                   | 1.4630168050  | 2.30648639E-16 | 17        | 2 PDHB             | 9         |
|              | 3 LRPPRC                  | 0.3953276748  | 5.89619188E-08 | 10        | 3 hsa-miR-30c-5p   | 6         |
|              | 4 NDUFB10                 | -0.1252739215 | 1.98432239E-02 | 7         | 4 MCM3             | 5         |
|              | 5 PARP1                   | 1.4444570181  | 4.36231945E-16 | 7         |                    |           |
|              | 6 FASN                    | 0.8214136306  | 9.35622445E-18 | 6         |                    |           |
|              | 7 hsa-miR-30c-5p          | 1.1385297858  | 7.71319416E-06 | 4         |                    |           |
|              | 8 MCM3                    | 0.2787153154  | 3.65381114E-03 | 4         |                    |           |
|              | 9 PTPN1                   | 0.2990868863  | 2.58685954E-07 | 3         |                    |           |
| <b>ACO1</b>  | 1 mRNA                    | 0.0852564056  | 6.40188330E-02 | 35        | 1 GDF15            | 14        |
|              | 2 hsa-miR-424-5p          | -0.8402135276 | 6.55446031E-16 | 33        | 2 RPS25            | 9         |
|              | 3 GDF15                   | -0.2673753659 | 1.64154116E-04 | 10        | 3 MVP              | 6         |
|              | 4 NT5C2                   | -0.2455978903 | 2.18785523E-04 | 7         | 4 GDI2             | 5         |
|              | 5 ITGA6                   | -0.7439250745 | 1.13692365E-05 | 6         | 5 NT5C2            | 5         |
|              | 6 ALDH4A1                 | 0.4792966204  | 8.58225010E-04 | 4         | 6 STXBP3           | 3         |
|              | 7 ALDOA                   | 0.6834697757  | 2.66231221E-04 | 4         | 7 TM9SF3           | 3         |
|              | 8 NFXL1                   | 0.1840099594  | 2.18214097E-02 | 3         |                    |           |
|              | 9 OLA1                    | -0.3371134721 | 2.07288266E-03 | 3         |                    |           |
| <b>HIBCH</b> | 1 mRNA                    | 0.4937972688  | 2.86488641E-02 | 35        | 1 FAM193A          | 5         |
|              | 2 EZR                     | -2.8131704338 | 3.60229548E-09 | 30        | 2 ACO2             | 4         |
|              | 3 hsa-miR-1280            | -1.6051347575 | 2.40197909E-05 | 11        |                    |           |
|              | 4 YWHAE                   | 1.5311033976  | 1.05948227E-03 | 11        |                    |           |
|              | 5 DPM1                    | 0.6141862960  | 1.20264110E-04 | 9         |                    |           |
|              | 6 HSD17B10                | 1.2062249922  | 4.89422023E-08 | 6         |                    |           |
|              | 7 YWHAQ                   | 1.0505652587  | 2.65126721E-03 | 5         |                    |           |
|              | 8 ATP2B1                  | -0.4591811894 | 1.29240240E-03 | 3         |                    |           |
|              | 9 PGM1                    | 1.3215203932  | 3.12847010E-04 | 3         |                    |           |
|              | 10 SLK                    | -0.4555643257 | 1.33331963E-02 | 3         |                    |           |
| <b>ITGB1</b> | 1 mRNA                    | 0.0646018980  | 5.20240969E-01 | 35        | 1 hsa-miR-25-3p    | 4         |
|              | 2 STS                     | 0.7522465180  | 1.97695096E-08 | 25        | 2 TM9SF4           | 4         |
|              | 3 HNRNPH2                 | 0.3038904704  | 7.23753840E-05 | 14        | 3 YWHAE            | 4         |
|              | 4 ENPEP                   | 0.3083051966  | 3.16872367E-05 | 7         | 4 KRT23            | 3         |
|              | 5 YWHAE                   | -0.4650070281 | 2.00851876E-05 | 7         | 5 LRP2             | 3         |
|              | 6 PA2G4                   | -0.4708349942 | 1.22692625E-05 | 3         | 6 PA2G4            | 3         |
|              |                           |               |                | 7 PPA2    | 3                  |           |
|              |                           |               |                | 8 UBA1    | 3                  |           |
| <b>MME</b>   | 1 mRNA                    | 0.0810650026  | 5.17115335E-02 | 35        | 1 ACSL3            | 21        |
|              | 2 SERPINH1                | -0.7353403620 | 4.37914401E-09 | 11        | 2 MTX1             | 5         |
|              | 3 ETFA                    | -0.4459024966 | 8.41133795E-14 | 10        | 3 MAN2A1           | 4         |
|              | 4 DPP4                    | 0.6545089697  | 2.80827131E-17 | 6         | 4 C1orf101         | 3         |
|              | 5 HADH                    | -0.1746720992 | 1.24093258E-12 | 6         | 5 XPNPEP1          | 3         |
|              | 6 COMT                    | -0.1619103364 | 1.58931018E-06 | 5         |                    |           |
|              | 7 hsa-miR-320b            | 0.9346249200  | 1.02441293E-30 | 5         |                    |           |
|              | 8 hsa-miR-27a-3p          | 0.5659990837  | 1.43213065E-06 | 3         |                    |           |
|              | 9 hsa-miR-523-3p          | -0.4892651221 | 7.95415041E-09 | 3         |                    |           |
|              | 10 hsa-miR-625-5p         | -0.6309636434 | 3.65919645E-10 | 3         |                    |           |

| Protein        | Regulators of the protein |                 |               |                | Proteins regulated |           |                |    |
|----------------|---------------------------|-----------------|---------------|----------------|--------------------|-----------|----------------|----|
|                | Name                      | Coef            | p value       | Frequency      | Name               | Frequency |                |    |
| <b>HSD17B1</b> | 1                         | mRNA            | 0.1768363949  | 1.10714445E-06 | 35                 | 1         | AP2B1          | 7  |
|                | 2                         | AP2B1           | 0.6936874572  | 1.93200773E-10 | 27                 | 2         | ATP5B          | 7  |
|                | 3                         | hsa-miR-936     | -0.7303242372 | 1.62707981E-07 | 10                 | 3         | DNAJA1         | 5  |
|                | 4                         | STOM            | 0.2320886936  | 3.75567352E-05 | 6                  | 4         | STS            | 4  |
|                | 5                         | GLB1            | 0.2136988693  | 1.99629890E-07 | 5                  | 5         | TGM2           | 4  |
|                | 6                         | IMMT            | 0.2346606109  | 8.38192666E-04 | 4                  | 6         | hsa-miR-34a-5p | 3  |
|                | 7                         | RER1            | -0.1949523324 | 4.63959195E-04 | 4                  |           |                |    |
|                | 8                         | CCDC160         | -0.2812987425 | 2.49263196E-05 | 3                  |           |                |    |
|                | 9                         | GPI             | -0.5736815222 | 3.57235457E-04 | 3                  |           |                |    |
|                | 10                        | hsa-miR-34a-5p  | 0.6578191147  | 4.05983152E-08 | 3                  |           |                |    |
|                | 11                        | hsa-miR-654-5p  | 0.3610530473  | 1.04892162E-03 | 3                  |           |                |    |
|                | 12                        | NEFM            | -0.1693920529 | 1.56215545E-04 | 3                  |           |                |    |
|                | 13                        | UQCRFSL1        | 0.2284100786  | 1.55158788E-05 | 3                  |           |                |    |
| <b>RRBP1</b>   | 1                         | mRNA            | 0.3567608557  | 3.19672541E-12 | 35                 | 1         | IQGAP2         | 22 |
|                | 2                         | AARS            | 0.4688643163  | 2.93028067E-25 | 24                 | 2         | EPPK1          | 8  |
|                | 3                         | IQGAP2          | 0.5672436585  | 2.05378919E-25 | 11                 | 3         | EIF2S3L        | 7  |
|                | 4                         | NUP160          | 0.1835548928  | 5.53740439E-04 | 9                  | 4         | ASPH           | 4  |
|                | 5                         | ASPH            | 0.1637790771  | 6.14654812E-03 | 6                  | 5         | KRT23          | 3  |
| <b>SLC3A2</b>  | 1                         | mRNA            | 0.1381840013  | 2.61466672E-02 | 35                 | 1         | hsa-miR-1181   | 18 |
|                | 2                         | hsa-miR-22-3p   | 0.8170555473  | 1.08917086E-34 | 29                 | 2         | CASP3          | 13 |
|                | 3                         | TKT             | 0.8110334724  | 1.34939882E-06 | 7                  | 3         | KRT23          | 4  |
|                | 4                         | hsa-miR-518b    | -0.7991977534 | 5.58559146E-09 | 4                  | 4         | AIFM1          | 3  |
| <b>PFKL</b>    | 1                         | mRNA            | 0.1451191694  | 2.22120980E-02 | 35                 | 1         | ACADVL         | 14 |
|                | 2                         | NSD1            | -0.3311467944 | 6.42437694E-06 | 14                 | 2         | SMS            | 8  |
|                | 3                         | SMS             | 0.3534565224  | 3.22468330E-07 | 7                  | 3         | NSD1           | 5  |
|                | 4                         | TFRC            | -0.5029109091 | 2.17871296E-09 | 4                  | 4         | CARS           | 3  |
|                | 5                         | LIN28B          | 0.2285836005  | 1.82331660E-03 | 3                  | 5         | PDIA5          | 3  |
| <b>SPTAN1</b>  | 1                         | mRNA            | 0.2021595456  | 3.05337262E-01 | 35                 | 1         | SUPT16H        | 11 |
|                | 2                         | PLEC1           | 0.3313451639  | 5.85422020E-07 | 30                 | 2         | HMGB3          | 10 |
|                | 3                         | VDAC2           | -0.2961435232 | 7.10174200E-08 | 29                 | 3         | CAPN6          | 6  |
|                | 4                         | NUP210          | -0.2678456912 | 1.75571805E-03 | 6                  | 4         | PGAM1          | 4  |
|                | 5                         | KHSRP           | -0.6006329921 | 2.53692918E-03 | 5                  |           |                |    |
|                | 6                         | SPTBN1          | 0.2458724932  | 7.99058858E-06 | 3                  |           |                |    |
| <b>MVP</b>     | 1                         | mRNA            | 0.3004968546  | 1.15405592E-06 | 35                 | 1         | CAPN6          | 15 |
|                | 2                         | ACO1            | -0.2323945687 | 6.57989816E-11 | 14                 | 2         | TMED9          | 12 |
|                | 3                         | CALD1           | 0.4823860262  | 1.63575311E-12 | 14                 | 3         | CAST           | 9  |
|                |                           |                 |               |                |                    | 4         | HNRNPH2        | 6  |
|                |                           |                 |               |                |                    | 5         | CLIP1          | 5  |
|                |                           |                 |               |                |                    | 6         | NPEPPS         | 5  |
|                |                           |                 |               |                |                    | 7         | PSMB1          | 5  |
|                |                           |                 |               |                |                    | 8         | SLC25A5        | 5  |
| <b>ERO1L</b>   | 1                         | mRNA            | 0.2135739937  | 1.52488327E-01 | 35                 | 1         | FRY            | 19 |
|                | 2                         | treat           | NA            | NA             | 33                 | 2         | CFL1           | 14 |
|                |                           |                 |               |                |                    | 3         | SEPT7          | 12 |
|                |                           |                 |               |                |                    | 4         | SPAG17         | 5  |
|                |                           |                 |               |                |                    | 5         | SASH1          | 3  |
|                |                           |                 |               |                |                    | 6         | SQSTM1         | 3  |
| <b>DDX3X</b>   | 1                         | mRNA            | -0.0270457058 | 6.06027457E-01 | 35                 | 1         | PPP2R2A        | 10 |
|                | 2                         | CYP19A1         | 0.2459846127  | 1.19473269E-12 | 30                 | 2         | LMNA           | 8  |
|                | 3                         | LMNA            | 1.1248709853  | 2.60902084E-06 | 16                 | 3         | DDX17          | 7  |
|                | 4                         | DNM2            | 0.2451385475  | 2.76583355E-03 | 9                  | 4         | NONO           | 5  |
|                | 5                         | PKP3            | 0.1989345889  | 1.43153361E-03 | 4                  | 5         | LEMD2          | 3  |
|                | 6                         | hsa-miR-125a-5p | 0.6042315224  | 8.34450351E-08 | 3                  | 6         | LRRC1          | 3  |
|                |                           |                 |               |                | 7                  | PSMC6     | 3              |    |
|                |                           |                 |               |                | 8                  | VAMP8     | 3              |    |

| Protein        | Regulators of the protein |                |                |               | Proteins regulated |           |
|----------------|---------------------------|----------------|----------------|---------------|--------------------|-----------|
|                | Name                      | Coef           | p value        | Frequency     | Name               | Frequency |
| <b>PRDX2</b>   | 1 mRNA                    | -0.1227486846  | 1.09443731E-01 | 35            | 1 TPI1             | 23        |
|                | 2 AKR7A2                  | 0.5945643276   | 3.07990674E-13 | 11            | 2 MDH1             | 12        |
|                | 3 CNDP2                   | 1.7086447412   | 3.23930600E-09 | 11            | 3 CNDP2            | 6         |
|                | 4 MME                     | -0.5628341531  | 4.66244218E-09 | 8             | 4 PFN1             | 5         |
|                | 5 PFN1                    | 0.8081197507   | 7.81568716E-05 | 5             |                    |           |
|                | 6 YWHAE                   | 0.9482830755   | 4.29047710E-07 | 4             |                    |           |
|                | 7 CDIPT                   | -0.1690397413  | 2.58631034E-02 | 3             |                    |           |
| <b>SLC26A2</b> | 1 mRNA                    | 0.1971883711   | 4.86835786E-05 | 35            | 1 HSPA6            | 10        |
|                | 2 DSP                     | -0.2357970128  | 9.44771131E-07 | 12            | 2 CYTSB            | 4         |
|                | 3 CYP11A1                 | 0.1867719106   | 2.68015838E-06 | 7             | 3 EIF3F            | 4         |
|                | 4 HSPA6                   | 0.2010100328   | 1.08565104E-02 | 5             | 4 GFPT1            | 4         |
|                | 5 FAM179A                 | 0.2557952326   | 5.92799736E-04 | 4             | 5 TPP2             | 4         |
|                | 6 LGR6                    | 0.3037626456   | 1.25279502E-04 | 4             | 6 NSF              | 3         |
|                | 7 NSF                     | -0.3537444721  | 3.97508742E-06 | 4             | 7 PDIA4            | 3         |
|                | 8 ZMPSTE24                | 0.3659193340   | 1.37242588E-04 | 4             | 8 STT3A            | 3         |
|                | 9 C3                      | 0.2087270020   | 5.85784974E-07 | 3             | 9 TIAM1            | 3         |
|                |                           |                |                |               | 1                  |           |
|                | 10 GFPT1                  | -0.9966622792  | 7.79455954E-06 | 3             | 0 UBA2             | 3         |
| 11 RPL12       | 0.2629544832              | 6.71631211E-03 | 3              |               |                    |           |
| <b>HDAC2</b>   | 1 mRNA                    | 0.8828498490   | 6.25238145E-02 | 35            | 1 hsa-miR-130b-3p  | 9         |
|                | 2 LEPRE1                  | 1.2998082940   | 6.31905893E-07 | 12            | 2 GM2A             | 4         |
|                | 3 UGP2                    | -3.6130963734  | 4.48419169E-06 | 9             | 3 CPT1A            | 3         |
|                | 4 hsa-miR-130b-3p         | -1.1205304843  | 2.54748911E-05 | 7             | 4 HIST1H1C         | 3         |
|                | 5 NAPA                    | 1.0606459575   | 5.08740426E-06 | 6             | 5 PDXDC1           | 3         |
|                | 6 GM2A                    | 0.6228665207   | 4.94118165E-07 | 5             | 6 RPS13            | 3         |
|                | 7 EIF2S1                  | 1.2049380454   | 4.65730579E-06 | 4             |                    |           |
| <b>HSPB1</b>   | 1 mRNA                    | 0.2212484820   | 4.78705468E-08 | 35            | 1 RAI14            | 10        |
|                | 2 SERPINC1                | 0.6380853096   | 6.79953792E-07 | 13            | 2 NAGK             | 8         |
|                | 3 HADHA                   | -1.0473925842  | 6.57749472E-08 | 8             | 3 KRT23            | 7         |
|                | 4 hsa-miR-584-5p          | 0.7588319158   | 7.67001669E-05 | 5             | 4 hsa-miR-193b-3p  | 6         |
|                | 5 hsa-miR-365a-3p         | -1.0683967831  | 1.15802791E-02 | 4             | 5 PKM2             | 4         |
|                | 6 PKM2                    | -1.9356893743  | 5.93931201E-08 | 3             | 6 CCDC109A         | 3         |
| <b>JUP</b>     | 1 mRNA                    | 0.5244387276   | 2.48650318E-09 | 35            | 1 SAPS3            | 20        |
|                | 2 PHC1                    | 0.2639489984   | 1.53015805E-04 | 20            | 2 LMF2             | 8         |
|                | 3 AUTS2                   | 0.2206589021   | 7.81636319E-03 | 4             | 3 AHCY             | 6         |
|                | 4 PCBP1                   | 0.3536006092   | 1.24008691E-03 | 4             | 4 EEF2             | 6         |
|                | 5 PDCD10                  | -0.2034779527  | 9.48760359E-03 | 3             | 5 AUTS2            | 4         |
|                |                           |                |                | 6 ERAP1       | 3                  |           |
| <b>SMS</b>     | 1 mRNA                    | 0.4747203606   | 9.60630839E-03 | 35            | 1 SNTB1            | 15        |
|                | 2 API5                    | 0.3158614062   | 7.35707026E-04 | 9             | 2 ARCN1            | 13        |
|                | 3 TCEAL4                  | -0.4583926165  | 1.16103215E-04 | 7             | 3 CYP11A1          | 12        |
|                | 4 ARL1                    | 0.4350086531   | 2.16378081E-03 | 4             | 4 BUB3             | 5         |
|                | 5 PSMA3                   | 0.3892210104   | 1.84164749E-03 | 4             | 5 CSNK2A1          | 4         |
|                |                           |                |                | 6 IGF2BP3     | 4                  |           |
|                |                           |                |                | 7 hsa-miR-484 | 3                  |           |
| <b>ETFDH</b>   | 1 mRNA                    | -0.6189700185  | 2.52295659E-03 | 35            | 1 HNRNPR           | 6         |
|                | 2 ND1                     | 0.9402376874   | 8.93786134E-10 | 11            | 2 ACO2             | 5         |
|                | 3 NDUFV1                  | 0.5899885477   | 8.55408762E-09 | 11            | 3 hsa-miR-1280     | 5         |
|                | 4 hsa-miR-1280            | -1.9179208801  | 5.81615290E-10 | 6             | 4 hsa-miR-192-5p   | 4         |
|                | 5 ACO2                    | 0.7659311769   | 1.77895040E-07 | 5             |                    |           |
|                | 6 PEG3                    | 0.2738198438   | 2.17520436E-03 | 5             |                    |           |
|                | 7 ATP5J2                  | 0.7428574719   | 6.45423674E-09 | 4             |                    |           |
|                | 8 hsa-miR-519b-3p         | -1.2835768366  | 6.37275531E-04 | 4             |                    |           |
|                | 9 SLC25A24                | 0.7410114209   | 3.25434937E-06 | 4             |                    |           |
|                | 10 CAPN6                  | -0.3537923397  | 3.60077031E-05 | 3             |                    |           |
| <b>TXNRD1</b>  | 1 mRNA                    | -0.1544089242  | 2.78057472E-01 | 35            | 1 SMC1A            | 10        |
|                | 2 treat                   | NA             | NA             | 21            | 2 MBOAT7           | 7         |
|                | 3 HSD3B1                  | 0.2940607321   | 2.28761081E-28 | 10            | 3 TFRC             | 6         |
|                | 4 EPS8L2                  | 0.1910418813   | 3.34478660E-07 | 9             | 4 ATP5B            | 4         |
|                |                           |                |                | 5 PCYOX1      | 3                  |           |
|                |                           |                |                | 6 RPS18       | 3                  |           |

| Protein        | Regulators of the protein |               |                |           | Proteins regulated  |           |
|----------------|---------------------------|---------------|----------------|-----------|---------------------|-----------|
|                | Name                      | Coef          | p value        | Frequency | Name                | Frequency |
| <b>HMOX1</b>   | 1 mRNA                    | 1.2348987032  | 2.03280647E-28 | 35        | 1 MTX1              | 13        |
|                | 2 treat                   | NA            | NA             | 35        |                     |           |
|                | 3 FLAD1                   | -0.1727759226 | 1.22340663E-05 | 8         |                     |           |
|                | 4 MTX1                    | -0.2549988483 | 1.87258879E-06 | 8         |                     |           |
|                | 5 CDKN2AIP                | -0.2068015285 | 1.59057123E-05 | 7         |                     |           |
| <b>PDCD4</b>   | 1 mRNA                    | 0.2582967486  | 4.18909243E-02 | 35        | 1 STX7              | 5         |
|                | 2 hsa-miR-365a-3p         | 1.4404855975  | 1.14706235E-11 | 27        | 2 hsa-miR-140-5p    | 4         |
|                | 3 SRP68                   | 0.2902615378  | 1.65868037E-03 | 13        | 3 hsa-miR-365a-3p   | 4         |
|                | 4 RPL11                   | -0.4004208999 | 8.09081947E-04 | 9         | 4 GNAQ              | 3         |
|                | 5 HYOU1                   | 0.4712372687  | 1.66397303E-08 | 3         | 5 NOMO1             | 3         |
|                | 6 PRDX3                   | -0.4103561285 | 3.94119546E-04 | 3         | 6 RAB5A             | 3         |
| <b>GNS</b>     | 1 mRNA                    | 0.1698757277  | 3.21038935E-01 | 35        | 1 EPS8L2            | 5         |
|                | 2 EPS8L2                  | 0.5614250326  | 1.36041295E-07 | 14        | 2 ATP5H             | 3         |
|                | 3 STS                     | 1.7553665288  | 3.54501087E-09 | 9         | 3 DDX3X             | 3         |
|                | 4 PYGL                    | 0.6320253902  | 1.49237744E-06 | 7         | 4 GLB1              | 3         |
|                | 5 hsa-miR-30a-5p          | -2.6480790715 | 3.65646063E-06 | 6         | 5 PYGL              | 3         |
|                | 6 CLIP1                   | 0.5616189500  | 4.83602998E-12 | 5         |                     |           |
|                | 7 CAPNS1                  | -0.8116356795 | 1.77077300E-05 | 4         |                     |           |
|                | 8 GLB1                    | 0.5907474668  | 7.39805638E-07 | 4         |                     |           |
|                | 9 NDRG1                   | -0.5940583657 | 4.96722644E-08 | 3         |                     |           |
| <b>TES</b>     | 1 mRNA                    | -0.1757979106 | 1.60143738E-01 | 35        | 1 hsa-miR-26b-5p    | 20        |
|                | 2 PDCD4                   | 0.5249467867  | 5.90814423E-09 | 22        | 2 hsa-miR-30e-5p    | 9         |
|                | 3 hsa-miR-26b-5p          | 2.0948881109  | 7.38520426E-11 | 12        | 3 NSF               | 9         |
|                | 4 SF3A1                   | -0.2421888629 | 2.63598878E-02 | 4         | 4 STT3B             | 6         |
|                |                           |               |                |           | 5 MARS              | 3         |
| <b>CYP11A1</b> | 1 mRNA                    | 0.9766913481  | 1.57317050E-32 | 35        | 1 DAB2              | 12        |
|                | 2 NAMPT                   | -0.9332566028 | 3.94326009E-09 | 30        | 2 FAM193A           | 4         |
|                | 3 NCLN                    | 0.3990942001  | 1.00493087E-04 | 12        | 3 RAI14             | 3         |
|                | 4 LRRC16A                 | -0.3457139838 | 1.84470263E-04 | 7         |                     |           |
|                | 5 FAM193A                 | -0.5923440040 | 1.57526881E-04 | 5         |                     |           |
|                | 6 HMGB1L1                 | -0.4072287713 | 2.56706678E-05 | 5         |                     |           |
|                | 7 SF3A1                   | 0.7743421476  | 1.63630268E-04 | 5         |                     |           |
|                | 8 U2AF2                   | 0.3049191825  | 1.14172611E-02 | 5         |                     |           |
|                | 9 EEA1                    | 0.4857336921  | 1.37440920E-03 | 3         |                     |           |
| <b>ALPP</b>    | 1 mRNA                    | 0.6537937816  | 7.97751180E-04 | 35        | 1 hsa-miR-150-3p    | 5         |
|                | 2 M6PR                    | 1.2458097991  | 8.00655878E-06 | 16        | 2 M6PR              | 5         |
|                | 3 hsa-miR-203             | -2.5210333858 | 1.68576076E-08 | 6         | 3 hsa-miR-365a-3p   | 4         |
|                | 4 hsa-miR-365a-3p         | -2.0976155223 | 5.25577087E-05 | 6         | 4 hsa-miR-518f-3p   | 3         |
|                | 5 PRSS8                   | 0.5734783771  | 2.59572401E-06 | 6         |                     |           |
|                | 6 hsa-miR-20b-5p          | -1.4948639958 | 3.39648440E-11 | 5         |                     |           |
|                | 7 PSMD4                   | -0.3229388951 | 2.25639091E-02 | 5         |                     |           |
|                | 8 AKR1B1                  | 1.6311606917  | 1.68707279E-06 | 4         |                     |           |
|                | 9 CPT1A                   | 1.0722625112  | 2.15524993E-04 | 4         |                     |           |
|                | 10 hsa-miR-520b           | 2.4667840237  | 3.58200449E-07 | 3         |                     |           |
| <b>SLC7A5</b>  | 1 mRNA                    | -0.0602427130 | 6.35864015E-01 | 35        | 1 hsa-miR-345-5p    | 28        |
|                | 2 TFRC                    | 0.8152133185  | 1.58038514E-11 | 33        | 2 KDELR1            | 11        |
|                |                           |               |                |           | 3 hsa-miR-335-3p    | 4         |
| <b>FN1</b>     | 1 mRNA                    | 0.6036937154  | 8.06373303E-10 | 35        | 1 A2M               | 4         |
|                | 2 HSPA5                   | 2.3627788130  | 7.00744902E-55 | 28        | 2 BAZ1B             | 4         |
|                | 3 TNFAIP3                 | -0.4512188867 | 1.74021885E-10 | 13        | 3 cDNA.FLJ33617.fis | 3         |
|                | 4 PDXDC1                  | -0.3875747019 | 8.18674646E-04 | 10        |                     |           |
|                | 5 UBA6                    | 0.4478318748  | 2.16703621E-10 | 9         |                     |           |
|                | 6 NUP205                  | 0.4969227700  | 3.49823521E-20 | 6         |                     |           |
|                | 7 A2M                     | 0.6045142186  | 5.11395624E-05 | 4         |                     |           |
|                | 8 hsa-miR-936             | -1.2436521547 | 3.20932963E-04 | 4         |                     |           |
|                | 9 ERO1L                   | 0.4739551087  | 4.85357563E-28 | 3         |                     |           |
|                | 10 hsa-miR-519c-3p        | -2.5701217367 | 6.71484384E-06 | 3         |                     |           |
|                | 11 REV1                   | -0.4806396254 | 5.37481303E-04 | 3         |                     |           |
|                | 12 treat                  | NA            | NA             | 3         |                     |           |

| Protein        | Regulators of the protein |               |                |           | Proteins regulated |           |
|----------------|---------------------------|---------------|----------------|-----------|--------------------|-----------|
|                | Name                      | Coef          | p value        | Frequency | Name               | Frequency |
| <b>FTH1</b>    | 1 mRNA                    | -0.3364435047 | 2.32412799E-01 | 35        | 1 SEC23B           | 7         |
|                | 2 TUFM                    | 1.2557998516  | 1.08821003E-06 | 26        | 2 hsa-miR-221-3p   | 6         |
|                | 3 RPIA                    | 0.6095804746  | 9.75277681E-07 | 24        | 3 TPM4             | 5         |
|                | 4 ACSF2                   | 0.4441389390  | 1.34910355E-03 | 7         | 4 AMPD1            | 4         |
|                | 5 G3BP2                   | -0.6374928514 | 3.65663054E-06 | 4         | 5 RPIA             | 4         |
|                | 6 GGCT                    | 0.4193448765  | 1.42983225E-03 | 3         |                    |           |
|                | 7 NDRG1                   | 0.3508603115  | 4.18472467E-06 | 3         |                    |           |
|                | 8 PSMB6                   | 0.9016684389  | 2.23103346E-06 | 3         |                    |           |
| <b>HSD3B1</b>  | 1 mRNA                    | 0.4833795507  | 3.80524207E-18 | 35        | 1 TXNRD1           | 7         |
|                | 2 hsa-miR-335-3p          | -0.7774832289 | 8.70290062E-06 | 15        | 2 TGM2             | 5         |
|                | 3 DSP                     | -0.4333654679 | 3.60557279E-07 | 10        | 3 CTNNB1           | 3         |
|                | 4 SLC7A5                  | 0.6747244095  | 1.01551739E-05 | 10        | 4 DSP              | 3         |
|                | 5 CTNNB1                  | -1.3286535021 | 8.05384686E-09 | 7         |                    |           |
|                | 6 TXNRD1                  | 0.8923962027  | 6.88125581E-09 | 7         |                    |           |
|                | 7 HNRNPA3                 | -0.3379146394 | 4.04688212E-10 | 5         |                    |           |
|                | 8 FANCM                   | 0.3603215532  | 6.51405288E-04 | 4         |                    |           |
|                | 9 CRK                     | 0.4321364220  | 1.09517928E-09 | 3         |                    |           |
|                | 10 hsa-miR-584-5p         | -0.9135455640 | 1.32018281E-03 | 3         |                    |           |
|                | 11 SMC1A                  | -0.3243864730 | 1.16268447E-03 | 3         |                    |           |
| <b>MX1</b>     | 1 mRNA                    | 0.3120252147  | 1.85202239E-06 | 35        | 1 BZW2             | 5         |
|                | 2 HSD3B1                  | 0.6361131636  | 1.56128605E-13 | 8         | 2 SNX2             | 4         |
|                | 3 BZW2                    | 0.9409614058  | 3.72976349E-07 | 7         | 3 STIP1            | 3         |
|                | 4 ALAD                    | -0.6517993332 | 1.74672825E-03 | 5         |                    |           |
|                | 5 ALPP                    | 0.7447161478  | 2.40182849E-09 | 5         |                    |           |
|                | 6 SLC7A5                  | 1.5422022629  | 2.32692853E-11 | 5         |                    |           |
|                | 7 DDX3X                   | 0.9656155316  | 1.20439949E-06 | 4         |                    |           |
|                | 8 hsa-miR-451a            | 1.1308618744  | 1.21076155E-05 | 4         |                    |           |
|                | 9 TGM2                    | -5.6047697127 | 8.75954287E-10 | 4         |                    |           |
|                | 10 hsa-miR-193b-5p        | -3.9791640611 | 1.18289675E-15 | 3         |                    |           |
| <b>WARS</b>    | 1 mRNA                    | -0.2696746232 | 1.54116639E-02 | 35        | 1 AKR1A1           | 15        |
|                | 2 PLIN2                   | 0.3628073422  | 1.72525935E-07 | 21        | 2 U2AF2            | 11        |
|                | 3 GAA                     | -0.6024439688 | 3.31470885E-04 | 15        | 3 CLIC3            | 5         |
|                | 4 FNTA                    | -0.2935975353 | 2.20013877E-02 | 4         | 4 GAA              | 5         |
|                | 5 hsa-miR-520f            | -1.1866303534 | 1.49220267E-05 | 3         | 5 CYB5R1           | 4         |
| <b>CTSB</b>    | 1 mRNA                    | 0.3373276558  | 4.88246135E-02 | 35        | 1 hsa-miR-30c-5p   | 18        |
|                | 2 HSPB1                   | 0.8466367583  | 7.80198485E-12 | 29        | 2 EIF3I            | 4         |
|                | 3 EIF3I                   | 0.3575968117  | 1.81704365E-02 | 10        | 3 CLIC3            | 3         |
|                | 4 hsa-miR-30c-5p          | -1.6401193560 | 2.94606153E-12 | 4         | 4 CUX2             | 3         |
|                | 5 NACA                    | 0.4195978096  | 6.09526604E-03 | 4         |                    |           |
|                | 6 HNRNPF                  | -0.5748569912 | 4.67301503E-04 | 3         |                    |           |
|                | 7 SLC25A11                | 0.5447890262  | 3.30724095E-04 | 3         |                    |           |
| <b>CYP19A1</b> | 1 mRNA                    | 0.9885078082  | 2.53736663E-12 | 35        | 1 TFRC             | 17        |
|                | 2 MAN2B1                  | 0.9855265165  | 4.55897924E-08 | 33        | 2 CTNND1           | 6         |
|                | 3 DYNC2H1                 | 0.6052897530  | 1.15518790E-03 | 21        | 3 TXNRD1           | 6         |
|                |                           |               |                | 4 GLG1    | 3                  |           |
| <b>CLIP1</b>   | 1 mRNA                    | 0.4300477478  | 9.02312934E-02 | 35        | 1 DERA             | 9         |
|                | 2 GNS                     | 0.6936820036  | 2.17386895E-15 | 30        | 2 TMED10           | 3         |
|                | 3 DERA                    | -0.7702794085 | 2.27882190E-04 | 18        |                    |           |
|                | 4 KRT36                   | -0.4075497093 | 3.23215349E-04 | 11        |                    |           |
|                | 5 TMED10                  | 0.7698192238  | 1.87316826E-03 | 8         |                    |           |
|                | 6 ABCA13                  | 0.3994422243  | 2.77845821E-02 | 4         |                    |           |
|                | 7 MVP                     | 1.8909065791  | 2.02386323E-16 | 4         |                    |           |
|                | 8 MYH3                    | -0.5446938818 | 3.95743856E-05 | 4         |                    |           |
|                | 9 KIF5A                   | 0.5049551631  | 1.58528801E-06 | 3         |                    |           |
|                | 10 RPN1                   | -1.3794865042 | 6.76932746E-03 | 3         |                    |           |
|                | 11 TES                    | -0.3595371559 | 2.01484571E-02 | 3         |                    |           |



| Protein      | Regulators of the protein |               |                |           | Proteins regulated |           |
|--------------|---------------------------|---------------|----------------|-----------|--------------------|-----------|
|              | Name                      | Coef          | p value        | Frequency | Name               | Frequency |
| <b>PKP2</b>  | 1 mRNA                    | 0.0685486914  | 1.12103874E-01 | 35        | 1 NIPSNAP1         | 14        |
|              | 2 PLIN2                   | 0.2412468520  | 7.02847763E-08 | 13        | 2 GBP1             | 4         |
|              | 3 WDR1                    | 0.9997099554  | 6.18846987E-06 | 8         |                    |           |
|              | 4 TES                     | 0.5698339174  | 5.21548526E-10 | 7         |                    |           |
|              | 5 GBP1                    | 0.3219572561  | 1.10462320E-04 | 5         |                    |           |
|              | 6 NLN                     | 0.2855894421  | 1.13602698E-03 | 5         |                    |           |
|              | 7 hsa-miR-210             | 0.3940744114  | 7.31871756E-08 | 4         |                    |           |
| <b>CAPN6</b> | 1 mRNA                    | 1.2612380377  | 7.26159298E-20 | 35        | 1 hsa-miR-148a-3p  | 5         |
|              | 2 MYH14                   | 0.5722352073  | 2.02986639E-05 | 17        | 2 AP3B1            | 4         |
|              | 3 hsa-miR-34c-5p          | -0.8444344281 | 2.88865394E-06 | 13        | 3 HNRPDL           | 3         |
|              | 4 HNRNPC                  | 0.7098843644  | 4.46297988E-05 | 11        | 4 MYH14            | 3         |
|              | 5 C16orf96                | 0.3990555765  | 2.75493695E-04 | 10        |                    |           |
|              | 6 BASP1                   | -0.6925788236 | 1.09430492E-03 | 5         |                    |           |
|              | 7 DBNL                    | -0.9458960696 | 4.20567823E-09 | 3         |                    |           |
|              | 8 KIAA0090                | 0.8535384202  | 6.84495246E-04 | 3         |                    |           |
|              | 9 WNT4                    | 0.5637188069  | 6.90047253E-09 | 3         |                    |           |
|              | 10 ZCCHC2                 | -0.4896108394 | 8.99988581E-03 | 3         |                    |           |
| <b>CTSL1</b> | 1 mRNA                    | 1.8045465723  | 1.68690115E-17 | 35        | 1 VAMP8            | 3         |
|              | 2 TOMM40                  | 0.6780309748  | 1.76837953E-05 | 26        |                    |           |
|              | 3 KRT36                   | 0.3313308029  | 1.14046109E-03 | 16        |                    |           |
|              | 4 HMOX1                   | 0.3758753697  | 2.31140379E-02 | 4         |                    |           |
|              | 5 FAM25A                  | 0.6175626330  | 6.26555162E-03 | 3         |                    |           |
|              | 6 hsa-miR-378a-3p         | 1.5191523475  | 3.30109752E-03 | 3         |                    |           |
|              | 7 KIAA0090                | 0.9465299435  | 3.50451688E-05 | 3         |                    |           |
|              | 8 LBR                     | -0.4166386162 | 8.61293428E-04 | 3         |                    |           |
| <b>CD63</b>  | 1 mRNA                    | 0.7821901609  | 4.98086311E-03 | 35        | 1 HSD3B1           | 12        |
|              | 2 hsa-miR-574-3p          | -1.5623215172 | 3.40879838E-09 | 15        | 2 TXNRD1           | 8         |
|              | 3 AGL                     | -0.8606320581 | 3.81048887E-06 | 9         | 3 SDHB             | 5         |
|              | 4 SDHB                    | -0.8549225405 | 1.95903960E-04 | 7         |                    |           |
|              | 5 TXNRD1                  | 1.3231799432  | 2.12458629E-09 | 5         |                    |           |
| <b>STAT1</b> | 1 mRNA                    | 0.3328219824  | 6.16773063E-03 | 35        | 1 hsa-miR-451a     | 26        |
|              | 2 DAB2                    | 0.4911971225  | 5.37610568E-12 | 24        | 2 TMEM165          | 14        |
|              | 3 NAE1                    | 0.3902299662  | 7.92163689E-03 | 9         | 3 MATR3            | 4         |
|              | 4 LAMP2                   | 0.5478021887  | 1.22546768E-11 | 3         |                    |           |
|              | 5 MATR3                   | -0.5565009967 | 3.02150577E-04 | 3         |                    |           |
| <b>DAB2</b>  | 1 mRNA                    | 0.9636539151  | 4.27730684E-23 | 35        | 1 ERAP1            | 6         |
|              | 2 ERAP1                   | -0.7166817830 | 1.52241762E-08 | 12        | 2 CYP11A1          | 4         |
|              | 3 hsa-miR-22-3p           | 1.2241876241  | 2.46837868E-10 | 11        | 3 DDX3X            | 3         |
|              | 4 hsa-miR-574-3p          | -0.6239566873 | 5.99946294E-05 | 6         | 4 hsa-miR-520f     | 3         |
|              | 5 DDX3X                   | 0.5709885857  | 5.65202840E-04 | 5         | 5 SRP68            | 3         |
|              | 6 hsa-miR-20a-5p          | -0.8807232713 | 2.31225143E-10 | 3         |                    |           |
| <b>NDRG1</b> | 1 mRNA                    | 0.4557303618  | 1.55371788E-03 | 35        | 1 hsa-miR-584-5p   | 7         |
|              | 2 GARS                    | 1.2550848367  | 4.24031048E-09 | 8         | 2 PLIN2            | 6         |
|              | 3 hsa-miR-584-5p          | -2.7339532881 | 1.01435988E-05 | 6         | 3 MYL6B            | 4         |
|              | 4 PLIN2                   | 0.8279216206  | 2.17474773E-10 | 4         | 4 TIMP3            | 3         |
|              | 5 TPI1                    | 2.2879446933  | 6.02504012E-06 | 4         |                    |           |
|              | 6 ERO1L                   | 0.6572248089  | 1.10581576E-08 | 3         |                    |           |
|              | 7 hsa-let-7b-5p           | 1.0651451417  | 1.59963736E-04 | 3         |                    |           |
|              | 8 MYL6B                   | 0.9056328164  | 1.26073516E-07 | 3         |                    |           |
|              | 9 RPIA                    | 0.7324523050  | 3.77504928E-07 | 3         |                    |           |
| <b>PLIN2</b> | 1 mRNA                    | 0.3500108384  | 2.25803356E-01 | 35        | None               |           |
|              | 2 treat                   | NA            | NA             | 35        |                    |           |
| <b>GDF15</b> | 1 mRNA                    | 1.4501154791  | 2.42421848E-12 | 35        | 1 CAST             | 10        |
|              | 2 ALDH4A1                 | -1.7086221510 | 3.88128757E-07 | 19        | 2 CBR1             | 4         |
|              | 3 cDNA.FLJ52712           | 0.5222407465  | 4.28682332E-05 | 4         | 3 TFRC             | 3         |
|              | 4 MARCKS                  | 0.8049301693  | 6.19204824E-06 | 4         |                    |           |
|              | 5 hsa-miR-1246            | 0.9839784090  | 3.01750843E-05 | 3         |                    |           |
|              | 6 MTX1                    | -0.5753586644 | 7.30133195E-03 | 3         |                    |           |
|              | 7 TFRC                    | 2.4041852069  | 1.89912873E-04 | 3         |                    |           |

| Protein | Regulators of the protein |                 |               |                | Proteins regulated |           |   |
|---------|---------------------------|-----------------|---------------|----------------|--------------------|-----------|---|
|         | Name                      | Coef            | p value       | Frequency      | Name               | Frequency |   |
| EPS8L2  | 1                         | mRNA            | 0.6182556262  | 7.55805652E-04 | 35                 | 1 ACAT1   | 3 |
|         | 2                         | NDUFS8          | -0.7553233534 | 5.82319691E-06 | 13                 | 2 GAD2    | 3 |
|         | 3                         | RRBP1           | 1.1160251815  | 1.81273355E-09 | 10                 | 3 NDUFS8  | 3 |
|         | 4                         | SMC1A           | -0.5448091555 | 3.01393186E-04 | 9                  |           |   |
|         | 5                         | TNPO1           | 0.6240763438  | 3.45148527E-08 | 8                  |           |   |
|         | 6                         | TXNRD1          | 0.4129499435  | 1.58941919E-05 | 6                  |           |   |
|         | 7                         | GNS             | 0.3450927901  | 2.35297929E-06 | 5                  |           |   |
|         | 8                         | ATP5A1          | -2.1359293754 | 1.92388867E-04 | 4                  |           |   |
|         | 9                         | hsa-miR-1183    | -0.8636615758 | 6.76254045E-05 | 4                  |           |   |
|         | 10                        | hsa-miR-125a-5p | 0.9671597486  | 1.77002343E-04 | 4                  |           |   |
|         | 11                        | MESDC2          | 0.4379737904  | 1.11239498E-02 | 4                  |           |   |
|         | 12                        | ACSL3           | 0.9492916409  | 5.00454595E-08 | 3                  |           |   |
|         | 13                        | DDX6            | 0.2383673149  | 4.14689577E-03 | 3                  |           |   |

**Table S6.** Direct regulators of the mRNA transcripts of the 78 proteins. Frequency column represents, out of the 35 resampled data sets, the number of times a miRNA/protein was identified as a directed regulator of the target mRNA.

| Transcript     |    | Regulator       | Coef         | p value     | Frequency |
|----------------|----|-----------------|--------------|-------------|-----------|
| <b>MYOF</b>    | 1  | treat           | NA           | NA          | 35        |
|                | 2  | hsa-miR-518f-5p | 0.357212904  | 0.017824847 | 16        |
|                | 3  | hsa-miR-30a-5p  | 0.458472827  | 0.037406309 | 11        |
|                | 4  | hsa-miR-30e-5p  | 1.052890383  | 0.009789667 | 11        |
|                | 5  | TCEB1           | -0.103957181 | 0.005476074 | 10        |
|                | 6  | hsa-miR-519c-3p | 0.51664951   | 0.051005086 | 8         |
|                | 7  | CNDP2           | 0.215383639  | 0.042477577 | 7         |
|                | 8  | hsa-miR-29c-3p  | -0.524393626 | 0.012359941 | 6         |
|                | 9  | hsa-miR-1249    | -0.306359334 | 0.007743305 | 5         |
|                | 10 | hsa-miR-498     | 0.771266638  | 0.007376039 | 5         |
|                | 11 | hsa-miR-520a-5p | 0.327958918  | 0.076218732 | 5         |
|                | 12 | PSMD13          | 0.13644693   | 0.034285278 | 5         |
|                | 13 | PSMD8           | 0.090064895  | 0.016487441 | 5         |
| <b>HSP90B1</b> | 1  | hsa-miR-210     | 0.667772764  | 5.17E-06    | 22        |
|                | 2  | HSP90B2P        | 0.700101963  | 3.05E-05    | 21        |
|                | 3  | FN1             | 0.195245374  | 0.001320197 | 15        |
|                | 4  | ETFB            | 0.308288424  | 0.000707256 | 13        |
|                | 5  | HSPA5           | 1.521276541  | 6.37E-05    | 7         |
|                | 6  | hsa-miR-320b    | -1.367123398 | 4.10E-06    | 6         |
|                | 7  | hsa-miR-521     | 1.99080461   | 3.32E-05    | 6         |
|                | 8  | hsa-miR-320d    | -1.013077529 | 1.38E-05    | 5         |
|                | 9  | JUP             | -0.301173542 | 0.017252318 | 5         |
| <b>GAPDH</b>   | 1  | treat           | NA           | NA          | 32        |
|                | 2  | PLIN2           | 0.324787357  | 0.021597689 | 14        |
|                | 3  | ETFDH           | 0.1467939    | 0.012021117 | 11        |
|                | 4  | hsa-miR-210     | 0.442218853  | 0.005847569 | 9         |
|                | 5  | PCCB            | 0.308270377  | 0.002736201 | 8         |
|                | 6  | ERO1L           | 0.198970846  | 0.001312896 | 6         |
|                | 7  | FUCA1           | 0.307104471  | 3.30E-06    | 6         |
|                | 8  | LDHA            | -0.341191336 | 0.006494027 | 6         |
|                | 9  | JUP             | -0.181005747 | 0.008339742 | 5         |
|                | 10 | SQSTM1          | -0.123801081 | 0.053883817 | 5         |
| <b>ANXA1</b>   | 1  | hsa-miR-210     | -0.625084558 | 7.96E-11    | 25        |
|                | 2  | LCP1            | -0.175746282 | 0.022750246 | 15        |
|                | 3  | MX1             | 0.170141754  | 0.001270247 | 11        |
|                | 4  | hsa-miR-663a    | 0.241552428  | 0.003372635 | 7         |
|                | 5  | hsa-miR-877-5p  | 0.468833464  | 4.15E-05    | 7         |
|                | 6  | treat           | NA           | NA          | 7         |
|                | 7  | HSPA5           | -0.638551763 | 0.012823837 | 6         |
| <b>HSPA5</b>   | 1  | hsa-miR-320b    | -2.086003041 | 0.000642968 | 27        |
|                | 2  | ALAD            | 0.523378988  | 0.001425755 | 21        |
|                | 3  | TXNRD1          | -0.574676285 | 0.002869374 | 10        |
|                | 4  | SPINT1          | -0.525194747 | 0.002455647 | 9         |
|                | 5  | hsa-miR-125a-5p | -1.248256899 | 0.000378699 | 7         |
|                | 6  | hsa-miR-520c-3p | -2.001205222 | 1.82E-08    | 7         |
|                | 7  | ALPP            | -0.424320255 | 0.003257186 | 5         |
|                | 8  | CD63            | -0.517819025 | 0.004063856 | 5         |
|                | 9  | CYP19A1         | -0.369654785 | 0.001391222 | 5         |
|                | 10 | hsa-miR-29b-3p  | -1.552182321 | 1.98E-06    | 5         |
|                | 11 | treat           | NA           | NA          | 5         |

| Transcript    |    | Regulator        | Coef         | p value     | Frequency |
|---------------|----|------------------|--------------|-------------|-----------|
| <b>HADHA</b>  | 1  | TNFAIP3          | 0.088474747  | 0.001220454 | 22        |
|               | 2  | MYO9A            | -0.087998341 | 0.002097755 | 20        |
|               | 3  | treat            | NA           | NA          | 14        |
|               | 4  | hsa-miR-193b-3p  | -0.145464576 | 0.002337167 | 12        |
|               | 5  | SLC25A6          | -0.168132909 | 0.005141106 | 12        |
|               | 6  | HMGB1            | 0.077246814  | 0.019436671 | 11        |
|               | 7  | IRAK4            | 0.108422031  | 0.000177523 | 10        |
|               | 8  | HDAC2            | 0.081641678  | 0.000568631 | 8         |
|               | 9  | CNOT1            | -0.070440641 | 0.002201109 | 7         |
|               | 10 | ST13             | 0.047512128  | 0.042502913 | 7         |
|               | 11 | MGA              | -0.058958645 | 0.012613902 | 6         |
|               | 12 | RPS3             | 0.22116382   | 0.000699188 | 6         |
|               | 13 | RHBDL1           | -0.062814309 | 0.001222846 | 5         |
| <b>ENO1</b>   | 1  | treat            | NA           | NA          | 35        |
|               | 2  | MYO15A           | -0.143620736 | 0.010893665 | 20        |
|               | 3  | CTNND1           | -0.271091222 | 0.02597366  | 8         |
|               | 4  | ETFDH            | 0.094722693  | 0.009144444 | 7         |
|               | 5  | ND5              | 0.080941958  | 0.032948561 | 7         |
|               | 6  | hsa-miR-30a-5p   | 0.522559217  | 0.042336914 | 6         |
|               | 7  | hsa-miR-29b-3p   | -0.448007192 | 0.004769895 | 5         |
|               | 8  | JUP              | -0.161352539 | 0.006609356 | 5         |
| <b>IDH1</b>   | 1  | treat            | NA           | NA          | 34        |
|               | 2  | hsa-miR-141-3p   | 1.506100807  | 0.003454605 | 11        |
|               | 3  | ATP2A2           | 0.242116315  | 0.015316862 | 10        |
|               | 4  | SLC4A10          | 0.196313962  | 0.034133884 | 10        |
|               | 5  | HSPA5            | 0.926451221  | 0.004013429 | 9         |
|               | 6  | GNPDA1           | 0.243735022  | 0.004223295 | 8         |
|               | 7  | hsa-miR-877-5p   | -0.472164443 | 0.002732962 | 8         |
|               | 8  | RPL22            | 0.292783641  | 0.013232951 | 8         |
|               | 9  | hsa-miR-583      | -0.534462769 | 0.000584098 | 6         |
|               | 10 | CYCS             | 0.279578778  | 0.000473693 | 5         |
| <b>ACTN1</b>  | 1  | PDZD2            | -0.138298982 | 0.01395416  | 25        |
|               | 2  | treat            | NA           | NA          | 25        |
|               | 3  | hsa-miR-197-3p   | 0.318756172  | 0.002522184 | 19        |
|               | 4  | PDIA6            | -0.60179612  | 0.015029387 | 11        |
|               | 5  | ACTR2            | 0.248409892  | 0.00109124  | 9         |
|               | 6  | MAP4             | -0.20467251  | 0.000213117 | 9         |
|               | 7  | hsa-miR-664-3p   | 0.394705412  | 0.000210616 | 7         |
|               | 8  | TRMT2B           | -0.113123473 | 0.023236197 | 7         |
|               | 9  | HSPA5            | -0.663869717 | 3.60E-05    | 6         |
|               | 10 | EFR3A            | -0.141539337 | 0.012340107 | 5         |
|               | 11 | hsa-miR-518f-5p  | 0.657113408  | 0.0001824   | 5         |
|               | 12 | PDIA5            | 0.151820103  | 0.003071486 | 5         |
|               | 13 | RGS3             | -0.1181292   | 0.018106417 | 5         |
| <b>TFRC</b>   | 1  | hsa-miR-520c-3p  | 0.827872487  | 0.008087131 | 29        |
|               | 2  | PLIN2            | -0.47998979  | 2.53E-08    | 19        |
|               | 3  | treat            | NA           | NA          | 15        |
|               | 4  | hsa-miR-29b-1-5p | -0.440308094 | 0.046365841 | 7         |
|               | 5  | ELAVL1           | 0.146110469  | 0.008234784 | 6         |
|               | 6  | MX1              | 0.263657722  | 2.48E-05    | 6         |
|               | 7  | hsa-miR-210      | 0.394206202  | 0.010332213 | 5         |
| <b>ACADVL</b> | 1  | treat            | NA           | NA          | 34        |
|               | 2  | hsa-miR-498      | 0.539055885  | 0.007125478 | 13        |
|               | 3  | hsa-miR-629-3p   | -0.172625476 | 3.67E-05    | 12        |
|               | 4  | hsa-miR-1181     | -0.193125614 | 0.000146969 | 7         |
|               | 5  | hsa-miR-29b-3p   | -0.277650779 | 0.003711896 | 7         |
|               | 6  | HYOU1            | -0.087476696 | 0.014704582 | 7         |
|               | 7  | hsa-miR-193b-3p  | -0.241667887 | 0.006390728 | 6         |
|               | 8  | FAM115A          | 0.052233378  | 0.030174786 | 5         |
|               | 9  | hsa-miR-192-5p   | -0.219467447 | 0.015322752 | 5         |
|               | 10 | PGK1             | -0.219942674 | 0.024911803 | 5         |

| Transcript     |    | Regulator       | Coef         | p value     | Frequency |
|----------------|----|-----------------|--------------|-------------|-----------|
| <b>ALDH7A1</b> | 1  | treat           | NA           | NA          | 35        |
|                | 2  | EML5            | -0.33841088  | 0.002090432 | 23        |
|                | 3  | SLC3A2          | -0.604613482 | 0.04269625  | 15        |
|                | 4  | SLC25A12        | -0.588897036 | 0.001177768 | 13        |
|                | 5  | GNAI3           | 0.278577361  | 0.00111993  | 12        |
|                | 6  | ARHGAP1         | 0.429092079  | 0.039021095 | 10        |
|                | 7  | VCP             | -1.015819138 | 0.006511701 | 9         |
|                | 8  | hsa-miR-484     | -1.402153583 | 0.005121824 | 7         |
|                | 9  | CLINT1          | -0.303619812 | 0.007633498 | 6         |
|                | 10 | HBB             | 0.199433182  | 0.008082481 | 5         |
|                | 11 | hsa-miR-130b-3p | -0.541860034 | 0.012116666 | 5         |
|                | 12 | hsa-miR-660-5p  | -0.806673618 | 0.019281252 | 5         |
| <b>IDH2</b>    | 1  | hsa-miR-484     | -0.812071562 | 0.002551178 | 22        |
|                | 2  | MAP4            | 0.251883246  | 0.001310391 | 19        |
|                | 3  | TOMM70A         | 0.308823956  | 0.000637613 | 18        |
|                | 4  | SERPINE1        | -0.205921853 | 0.00733852  | 17        |
|                | 5  | OBSCN           | -0.242442481 | 0.006797508 | 16        |
|                | 6  | SQSTM1          | -0.179912355 | 0.008746341 | 14        |
|                | 7  | RPS27A          | -0.2880108   | 0.023309816 | 13        |
|                | 8  | treat           | NA           | NA          | 12        |
|                | 9  | EEF1G           | -0.523368993 | 0.016948233 | 8         |
|                | 10 | DDOST           | 0.861108473  | 0.00914094  | 7         |
|                | 11 | HSPA6           | 0.262817068  | 0.001292591 | 7         |
|                | 12 | SF3A1           | 0.249542002  | 0.003507882 | 7         |
|                | 13 | HEXA            | 0.376741605  | 0.000732979 | 5         |
| <b>EEF1A1</b>  | 1  | APEX1           | 0.124383953  | 0.002582265 | 17        |
|                | 2  | hsa-miR-342-3p  | 0.380434119  | 0.000106803 | 16        |
|                | 3  | CAP             | 0.192286984  | 0.020830494 | 10        |
|                | 4  | hsa-miR-150-3p  | -0.221270991 | 0.001323928 | 10        |
|                | 5  | ARID3A          | -0.111361726 | 0.005825608 | 9         |
|                | 6  | UQCRC2          | 0.396516248  | 7.58E-05    | 9         |
|                | 7  | RPL15           | 0.114606862  | 0.00693359  | 8         |
|                | 8  | RBM47           | -0.117559848 | 0.006348649 | 6         |
|                | 9  | hsa-miR-130b-3p | 0.278701222  | 0.000293917 | 5         |
|                | 10 | MYO15A          | -0.142781178 | 0.001704464 | 5         |
|                | 11 | PDLIM1          | 0.074934823  | 0.019129734 | 5         |
|                | 12 | RFPL4A          | 0.105973166  | 0.026271242 | 5         |
| <b>FASN</b>    | 1  | treat           | NA           | NA          | 31        |
|                | 2  | COX4I1          | -0.134950194 | 0.019017571 | 17        |
|                | 3  | MTERF           | -0.127749446 | 0.004409498 | 14        |
|                | 4  | hsa-miR-345-5p  | 0.355817127  | 0.006631843 | 7         |
|                | 5  | MCM5            | 0.197428777  | 0.000844636 | 6         |
|                | 6  | hsa-let-7b-5p   | -0.17476086  | 0.017334342 | 5         |
| <b>PDIA4</b>   | 1  | HSPA5           | 1.951795735  | 4.77E-06    | 27        |
|                | 2  | treat           | NA           | NA          | 21        |
|                | 3  | hsa-miR-210     | 0.634957574  | 0.001675556 | 15        |
|                | 4  | FN1             | 0.294631393  | 0.00013947  | 10        |
|                | 5  | DDX3X           | -0.390662475 | 0.005791673 | 8         |
|                | 6  | G3BP1           | -0.354856372 | 0.002180046 | 6         |
|                | 7  | HSP90B2P        | 0.37862339   | 0.014026951 | 6         |
|                | 8  | ETFB            | 0.328377145  | 0.008754327 | 5         |
|                | 9  | hsa-miR-141-3p  | 1.374928839  | 0.004343344 | 5         |
| <b>ACSS1</b>   | 1  | treat           | NA           | NA          | 35        |
|                | 2  | hsa-miR-524-3p  | -1.226927664 | 0.013362008 | 10        |
|                | 3  | PLIN2           | -0.424838078 | 0.01663384  | 10        |
|                | 4  | ETF1            | 0.167371294  | 0.009316654 | 7         |
|                | 5  | hsa-miR-30e-5p  | -1.209369715 | 0.039485415 | 6         |
|                | 6  | hsa-miR-320b    | -1.144814336 | 2.77E-05    | 6         |
|                | 7  | JUP             | 0.213829391  | 0.016786989 | 6         |
|                | 8  | KDELC2          | 0.184905182  | 0.001719033 | 5         |

| Transcript      |    | Regulator       | Coef         | p value     | Frequency |
|-----------------|----|-----------------|--------------|-------------|-----------|
| <b>ACO2</b>     | 1  | treat           | NA           | NA          | 16        |
|                 | 2  | hsa-miR-583     | -0.184158103 | 0.000811354 | 13        |
|                 | 3  | STX7            | 0.130701495  | 0.003332689 | 13        |
|                 | 4  | MAP4            | 0.08981871   | 0.011463992 | 11        |
|                 | 5  | MAP7D3          | -0.109239861 | 0.00536634  | 9         |
|                 | 6  | PHLDA2          | 0.110576629  | 0.000470774 | 9         |
|                 | 7  | hsa-miR-630     | -0.244797832 | 1.27E-05    | 8         |
|                 | 8  | DAB2            | 0.091733395  | 0.001557825 | 6         |
|                 | 9  | hsa-miR-150-3p  | 0.350298721  | 1.97E-07    | 6         |
|                 | 10 | hsa-miR-125b-5p | 0.425681835  | 1.04E-05    | 5         |
| <b>HADHB</b>    | 1  | treat           | NA           | NA          | 27        |
|                 | 2  | EML5            | -0.079639974 | 0.00372106  | 23        |
|                 | 3  | SRP72           | -0.0981266   | 0.000790333 | 23        |
|                 | 4  | EIF3F           | -0.109199496 | 0.0005719   | 13        |
|                 | 5  | MAP4            | 0.101451334  | 0.001937337 | 9         |
|                 | 6  | AIMP1           | 0.082066261  | 0.002057201 | 8         |
|                 | 7  | NDUFA10         | 0.074878674  | 0.005765905 | 7         |
|                 | 8  | hsa-miR-151a-3p | -0.172460295 | 0.016267324 | 6         |
|                 | 9  | hsa-miR-320b    | -0.397910249 | 8.82E-05    | 5         |
| <b>RASA1</b>    | 1  | treat           | NA           | NA          | 18        |
|                 | 2  | RPL15           | 0.253149893  | 0.044975179 | 14        |
|                 | 3  | hsa-miR-320b    | 1.253305232  | 0.005288745 | 10        |
|                 | 4  | hsa-miR-210     | -0.75117118  | 4.37E-06    | 9         |
|                 | 5  | HSPA5           | -1.227143766 | 0.005731774 | 8         |
|                 | 6  | ERO1L           | -0.232991846 | 0.006096468 | 6         |
|                 | 7  | hsa-miR-520c-3p | 0.897050847  | 0.004377236 | 6         |
|                 | 8  | EIF3F           | 0.415864693  | 0.00538859  | 5         |
|                 | 9  | RTN4            | 0.306516104  | 0.044143377 | 5         |
| <b>HSD17B10</b> | 1  | C16orf96        | -0.13402082  | 0.000302749 | 28        |
|                 | 2  | LAMC1           | 0.079909245  | 0.000825693 | 22        |
|                 | 3  | ATP5A1          | -0.365962973 | 0.001757704 | 17        |
|                 | 4  | MAPK3           | 0.114267635  | 0.002337817 | 11        |
|                 | 5  | RPL13A          | 0.091166495  | 0.004018643 | 11        |
|                 | 6  | WDR5B           | -0.071058004 | 0.005322668 | 11        |
|                 | 7  | hsa-miR-519c-3p | -0.668753822 | 2.71E-05    | 10        |
|                 | 8  | DYSF            | 0.084641907  | 0.030404703 | 9         |
|                 | 9  | CFL1            | -0.104540277 | 0.007383632 | 5         |
|                 | 10 | hsa-miR-574-3p  | -0.097686491 | 0.011026363 | 5         |
|                 | 11 | IDH3B           | -0.069814402 | 0.040353649 | 5         |
|                 | 12 | ODZ3            | 0.087306709  | 0.019420711 | 5         |
|                 | 13 | PSMA2           | -0.075754216 | 0.003008344 | 5         |
| <b>PARP1</b>    | 1  | treat           | NA           | NA          | 35        |
|                 | 2  | HMOX1           | -0.124548329 | 0.022720519 | 15        |
|                 | 3  | hsa-miR-320d    | -0.613134919 | 0.006105161 | 9         |
|                 | 4  | GSS             | 0.16295211   | 0.025282156 | 8         |
|                 | 5  | GPD2            | -0.169884225 | 0.013273312 | 7         |
|                 | 6  | EIF4G2          | -0.105442324 | 0.086057281 | 6         |
|                 | 7  | BCL11B          | 0.112573761  | 0.087467215 | 5         |
| <b>EGFR</b>     | 1  | treat           | NA           | NA          | 35        |
|                 | 2  | GALNT2          | 0.176840404  | 0.02142506  | 25        |
|                 | 3  | hsa-miR-484     | 0.804717537  | 0.009934432 | 22        |
|                 | 4  | hsa-miR-30a-5p  | 0.77427001   | 0.03980957  | 7         |
|                 | 5  | USP16           | 0.191185136  | 0.014023333 | 7         |
|                 | 6  | CPSF6           | 0.175157383  | 0.014732099 | 5         |
|                 | 7  | hsa-miR-224-5p  | 0.580629799  | 0.023848059 | 5         |
|                 | 8  | RPS25           | 0.319179016  | 0.004343219 | 5         |
| <b>ALDOA</b>    | 1  | treat           | NA           | NA          | 35        |
|                 | 2  | MYO15A          | -0.124066191 | 0.009465428 | 15        |
|                 | 3  | hsa-miR-518a-5p | 0.526977815  | 0.000324921 | 12        |
|                 | 4  | JUP             | -0.186680159 | 0.000414183 | 10        |
|                 | 5  | PLIN2           | 0.225782709  | 0.042987239 | 9         |
|                 | 6  | HDAC2           | -0.078135363 | 0.036759374 | 6         |
|                 | 7  | KRT1            | -0.076781179 | 0.004607837 | 5         |

| Transcript   |    | Regulator       | Coef         | p value     | Frequency |
|--------------|----|-----------------|--------------|-------------|-----------|
| <b>ECHS1</b> | 1  | treat           | NA           | NA          | 35        |
|              | 2  | hsa-miR-484     | -0.401910399 | 0.010466301 | 12        |
|              | 3  | hsa-miR-335-5p  | -0.589119056 | 0.006058375 | 9         |
|              | 4  | hsa-miR-423-5p  | -0.395895505 | 0.004342482 | 9         |
|              | 5  | hsa-miR-513a-5p | -0.269023434 | 0.023071431 | 7         |
|              | 6  | STAT1           | -0.136325793 | 0.010321019 | 7         |
|              | 7  | hsa-miR-320b    | -0.685652325 | 0.000638422 | 6         |
|              | 8  | EIF4G2          | -0.077489702 | 0.072409117 | 5         |
|              | 9  | hsa-miR-765     | -0.205849365 | 0.00078842  | 5         |
| <b>TPI1</b>  | 1  | treat           | NA           | NA          | 35        |
|              | 2  | SQSTM1          | -0.171616442 | 0.000923267 | 32        |
|              | 3  | PLIN2           | 0.274173567  | 0.053831111 | 19        |
|              | 4  | HSPB1           | -0.103751092 | 0.027303848 | 9         |
|              | 5  | STAT1           | -0.138702203 | 0.035747775 | 7         |
|              | 6  | NAPA            | -0.084151651 | 0.033777122 | 6         |
|              | 7  | TECR            | 0.147169481  | 0.012664393 | 6         |
| <b>GPI</b>   | 1  | treat           | NA           | NA          | 35        |
|              | 2  | hsa-miR-130a-3p | 1.320958905  | 0.009931766 | 8         |
|              | 3  | RPL22           | -0.168576352 | 0.016890407 | 8         |
|              | 4  | PCBP1           | -0.3057988   | 0.000959326 | 6         |
|              | 5  | TRMT2B          | 0.130533609  | 0.010622336 | 6         |
|              | 6  | PCCB            | 0.19845886   | 0.036284918 | 5         |
| <b>DSP</b>   | 1  | treat           | NA           | NA          | 35        |
|              | 2  | PEG3            | 0.22217946   | 0.000141096 | 23        |
|              | 3  | FAM115C         | 0.170137591  | 0.004861255 | 10        |
|              | 4  | hsa-miR-210     | 0.476214356  | 0.003513122 | 10        |
|              | 5  | CYP19A1         | 0.108924674  | 0.084175297 | 9         |
|              | 6  | hsa-miR-1181    | -0.262981223 | 0.015260669 | 6         |
|              | 7  | hsa-miR-193b-5p | 0.469434561  | 0.068146657 | 5         |
|              | 8  | PCBP1           | -0.26457429  | 0.000659001 | 5         |
| <b>LDHA</b>  | 1  | treat           | NA           | NA          | 35        |
|              | 2  | CALU            | -0.240666737 | 0.049742087 | 12        |
|              | 3  | CTNND1          | -0.607942221 | 0.048762898 | 8         |
| <b>HYOU1</b> | 1  | FN1             | 0.223412243  | 0.000137312 | 22        |
|              | 2  | hsa-miR-16-5p   | 2.28581693   | 5.65E-09    | 17        |
|              | 3  | hsa-miR-520c-3p | -1.133705372 | 5.17E-05    | 17        |
|              | 4  | HSP90B2P        | 0.424238978  | 0.000498782 | 16        |
|              | 5  | PICALM          | -0.64484436  | 0.008166886 | 11        |
|              | 6  | RBM15B          | -0.326793434 | 0.008149407 | 11        |
|              | 7  | EIF3A           | -0.53159471  | 0.003196427 | 10        |
|              | 8  | ETFB            | 0.255606106  | 0.00837843  | 9         |
|              | 9  | UBA2            | -0.231212426 | 0.027166268 | 9         |
|              | 10 | hsa-miR-452-5p  | 1.485401405  | 0.004315672 | 8         |
|              | 11 | FERMT2          | -0.505604135 | 0.00050979  | 6         |
|              | 12 | HDAC1           | -0.481740151 | 0.001589856 | 6         |
|              | 13 | hsa-miR-516a-5p | 2.470131367  | 0.009189356 | 6         |
|              | 14 | HSPA5           | 1.387980722  | 0.000417012 | 6         |
|              | 15 | HARS            | -0.32249683  | 0.001637514 | 5         |
|              | 16 | hsa-miR-23a-5p  | -1.062425433 | 0.004146106 | 5         |
|              | 17 | PDXDC1          | -0.326158569 | 0.000565949 | 5         |
| <b>ETFA</b>  | 1  | treat           | NA           | NA          | 34        |
|              | 2  | DNMT1           | 0.210291657  | 0.001654869 | 15        |
|              | 3  | hsa-miR-520c-3p | 0.502976277  | 0.019018266 | 13        |
|              | 4  | YWHAG           | 0.202506432  | 0.043595261 | 9         |
|              | 5  | LRPAP1          | 0.158293495  | 0.011744691 | 8         |
|              | 6  | ARL1            | 0.152947529  | 0.037918188 | 7         |
|              | 7  | FKBP4           | 0.125428565  | 0.005090033 | 7         |
|              | 8  | hsa-miR-516a-5p | -1.462811508 | 0.010246591 | 7         |
|              | 9  | hsa-miR-518a-5p | -0.443907618 | 0.024305641 | 6         |
|              | 10 | hsa-miR-520g    | 0.8488545    | 0.000587385 | 5         |

| Transcript   |    | Regulator       | Coef         | p value     | Frequency |
|--------------|----|-----------------|--------------|-------------|-----------|
| <b>PPIB</b>  | 1  | FN1             | 0.155401311  | 2.94E-05    | 29        |
|              | 2  | HSP90B2P        | 0.384343406  | 0.000265664 | 23        |
|              | 3  | hsa-miR-516a-5p | 1.522448379  | 0.00141253  | 14        |
|              | 4  | ETFB            | 0.236597103  | 2.27E-05    | 11        |
|              | 5  | ERO1L           | 0.142087824  | 0.011819231 | 6         |
|              | 6  | hsa-miR-520c-3p | -0.309460128 | 0.048813727 | 6         |
|              | 7  | ACO2            | 0.299416488  | 8.50E-05    | 5         |
|              | 8  | DNAH9           | 0.193061106  | 0.011352514 | 5         |
|              | 9  | hsa-miR-518a-5p | 0.738691547  | 5.47E-05    | 5         |
|              | 10 | HSPA5           | 0.568159465  | 0.024587734 | 5         |
| <b>GLDC</b>  | 1  | treat           | NA           | NA          | 28        |
|              | 2  | hsa-miR-520c-3p | 1.086507287  | 0.001321572 | 17        |
|              | 3  | HSPA5           | -1.208336033 | 0.004550254 | 17        |
|              | 4  | hsa-miR-141-3p  | -1.490154724 | 0.002497028 | 12        |
|              | 5  | CUL3            | 0.356414581  | 0.0006392   | 9         |
|              | 6  | hsa-miR-663a    | 0.43131129   | 0.002532782 | 6         |
|              | 7  | CSDA            | 0.176708188  | 0.072076851 | 5         |
|              | 8  | EIF3A           | 0.580648184  | 0.000819592 | 5         |
|              | 9  | hsa-miR-516a-5p | -1.877263633 | 0.013162939 | 5         |
|              | 10 | PSMC4           | 0.446603808  | 0.000455761 | 5         |
| <b>ACO1</b>  | 1  | treat           | NA           | NA          | 35        |
|              | 2  | EML5            | -0.247098116 | 0.006317203 | 19        |
|              | 3  | SRP68           | 0.242621041  | 0.001457234 | 12        |
|              | 4  | ARHGAP1         | 0.503908212  | 0.000964144 | 10        |
|              | 5  | hsa-miR-583     | -0.366241962 | 0.003912146 | 10        |
|              | 6  | hsa-miR-1323    | -1.377088545 | 0.01534051  | 7         |
|              | 7  | hsa-miR-936     | -0.583485844 | 0.002462732 | 6         |
|              | 8  | HSP90AB2P       | -0.664332763 | 0.001862148 | 6         |
|              | 9  | hsa-miR-25-3p   | -0.892565053 | 0.015422009 | 5         |
| <b>HIBCH</b> | 1  | treat           | NA           | NA          | 31        |
|              | 2  | hsa-miR-484     | -0.501555375 | 0.006383377 | 21        |
|              | 3  | hsa-miR-520a-5p | -0.511331357 | 0.01345269  | 16        |
|              | 4  | SLC25A6         | -0.218908367 | 0.029515957 | 13        |
|              | 5  | EIF4G2          | -0.09773237  | 0.002950069 | 9         |
|              | 6  | HMOX1           | -0.070098631 | 0.032644556 | 7         |
|              | 7  | LRP1            | 0.054802241  | 0.002473522 | 7         |
|              | 8  | CPSF6           | -0.138587528 | 0.000440408 | 5         |
|              | 9  | hsa-miR-1202    | 0.149436835  | 0.01772464  | 5         |
|              | 10 | hsa-miR-224-5p  | -0.240010991 | 0.025970738 | 5         |
| <b>ITGB1</b> | 1  | RPL15           | 0.310347255  | 0.000230002 | 25        |
|              | 2  | HSPA5           | -0.520963791 | 0.001136312 | 16        |
|              | 3  | PSMD13          | 0.251217607  | 0.012384563 | 10        |
|              | 4  | C1orf173        | -0.13762656  | 0.007298649 | 9         |
|              | 5  | POTEKP          | 0.418635332  | 0.008104846 | 7         |
|              | 6  | hsa-miR-583     | 0.234978118  | 0.008016874 | 6         |
|              | 7  | SOX11           | -0.152745029 | 0.010946228 | 6         |
| <b>MME</b>   | 1  | treat           | NA           | NA          | 35        |
|              | 2  | PLIN2           | 0.435355847  | 0.024599189 | 7         |
|              | 3  | CALU            | -0.147903984 | 0.037207911 | 6         |
|              | 4  | hsa-miR-130b-3p | 0.423551101  | 0.006476441 | 6         |
|              | 5  | LGALS3BP        | 0.160705515  | 0.024988122 | 6         |
|              | 6  | LMNA            | -0.470524506 | 0.025320542 | 5         |



| Transcript     |    | Regulator       | Coef         | p value     | Frequency |
|----------------|----|-----------------|--------------|-------------|-----------|
| <b>HSD17B1</b> | 1  | treat           | NA           | NA          | 35        |
|                | 2  | hsa-miR-193b-5p | -0.728706428 | 0.007000038 | 14        |
|                | 3  | HK2             | -0.18236399  | 0.013630791 | 12        |
|                | 4  | hsa-miR-365a-3p | -0.716746851 | 0.013866295 | 8         |
|                | 5  | LDHA            | -0.354748905 | 0.011535802 | 8         |
|                | 6  | ALDOA           | -0.412333689 | 0.034882084 | 7         |
|                | 7  | ITGA6           | 0.545049065  | 0.005037426 | 7         |
|                | 8  | DAB2            | 0.203028925  | 0.015522951 | 6         |
|                | 9  | EFTUD2          | 0.167343034  | 0.012342958 | 6         |
|                | 10 | PLIN2           | 0.419868255  | 0.025454915 | 6         |
|                | 11 | EIF4A1          | 0.461673481  | 0.056484576 | 5         |
|                | 12 | GPI             | -0.691226557 | 0.007336259 | 5         |
|                | 13 | hsa-miR-210     | 0.381441646  | 0.048676991 | 5         |
|                | 14 | hsa-miR-324-5p  | 0.678429452  | 0.000618808 | 5         |
|                | 15 | LAMC1           | 0.18057246   | 0.000129695 | 5         |
| <b>RRBP1</b>   | 1  | hsa-miR-210     | -0.369795102 | 1.31E-05    | 29        |
|                | 2  | hsa-miR-130a-3p | -1.594454737 | 1.16E-05    | 24        |
|                | 3  | PHLDA2          | 0.141193963  | 0.004783974 | 13        |
|                | 4  | SLC38A2         | 0.124388444  | 0.010897721 | 13        |
|                | 5  | PEG3            | -0.087920307 | 0.025597167 | 11        |
|                | 6  | NDRG1           | -0.168658362 | 0.006429283 | 10        |
|                | 7  | hsa-miR-520f    | 0.527967623  | 0.000736427 | 9         |
|                | 8  | treat           | NA           | NA          | 8         |
|                | 9  | EEF1G           | 0.288612218  | 0.031047977 | 5         |
|                | 10 | NUP160          | -0.13840353  | 0.023615653 | 5         |
| <b>SLC3A2</b>  | 1  | treat           | NA           | NA          | 34        |
|                | 2  | BAT3            | -0.218280907 | 0.000284677 | 14        |
|                | 3  | TXNRD1          | -0.275132077 | 0.00861079  | 13        |
|                | 4  | CD180           | -0.203817689 | 0.003600245 | 8         |
|                | 5  | HSD3B1          | -0.154537433 | 0.020160658 | 6         |
|                | 6  | CD63            | -0.132988663 | 0.041926462 | 5         |
|                | 7  | CTNND1          | -0.26998117  | 0.063870071 | 5         |
|                | 8  | GNAI3           | -0.120035546 | 0.00211391  | 5         |
|                | 9  | hsa-miR-30d-5p  | 0.754578871  | 0.006289537 | 5         |
|                | 10 | HYOU1           | -0.096118492 | 0.107851004 | 5         |
| <b>PFKL</b>    | 1  | ND2             | 0.238247484  | 0.002385276 | 16        |
|                | 2  | RPS13           | -0.243244903 | 0.002132964 | 16        |
|                | 3  | MAP7D3          | 0.251859468  | 0.002405818 | 15        |
|                | 4  | HDAC2           | -0.246458961 | 0.000291168 | 14        |
|                | 5  | PBX1            | -0.168573121 | 0.011141009 | 14        |
|                | 6  | RPL29           | -0.312456123 | 0.0013049   | 13        |
|                | 7  | GM2A            | -0.20913453  | 0.001425832 | 7         |
|                | 8  | hsa-miR-1225-3p | 0.435243063  | 0.017427734 | 7         |
|                | 9  | SLC4A10         | -0.228043537 | 0.003811309 | 7         |
|                | 10 | ANXA7           | 0.464490194  | 0.002022324 | 6         |
|                | 11 | CLDN3           | 0.181283244  | 0.01986302  | 6         |
|                | 12 | hsa-miR-518d-3p | 0.609596957  | 0.008599049 | 6         |
|                | 13 | hsa-miR-520b    | -0.678464433 | 0.002486702 | 6         |
|                | 14 | RAB2A           | -0.313589877 | 0.000710087 | 5         |

| Transcript    |    | Regulator         | Coef         | p value     | Frequency |
|---------------|----|-------------------|--------------|-------------|-----------|
| <b>SPTAN1</b> | 1  | XRCC5             | -0.557628974 | 0.00064855  | 17        |
|               | 2  | hsa-miR-1181      | -0.217319337 | 1.73E-05    | 14        |
|               | 3  | CYFIP1            | 0.145441691  | 0.001545352 | 13        |
|               | 4  | KRT13             | 0.261922852  | 0.009433886 | 10        |
|               | 5  | hsa-miR-29b-1-5p  | -0.204638943 | 0.001540449 | 9         |
|               | 6  | PEG3              | 0.122290218  | 0.001954624 | 9         |
|               | 7  | TMEM205           | -0.13941755  | 0.000144995 | 9         |
|               | 8  | UBE2N             | -0.224116458 | 0.022926565 | 9         |
|               | 9  | EVPL              | -0.159136204 | 0.019514368 | 8         |
|               | 10 | TBK1              | -0.189089965 | 0.000407207 | 8         |
|               | 11 | EIF4G2            | -0.13208195  | 0.000168476 | 7         |
|               | 12 | FAM115C           | 0.123945358  | 0.01219233  | 7         |
|               | 13 | hsa-miR-629-3p    | -0.2730245   | 1.78E-05    | 7         |
|               | 14 | LEMD2             | 0.148928903  | 0.003028354 | 7         |
|               | 15 | PHLDA2            | -0.157936434 | 0.001089006 | 7         |
|               | 16 | RPL18             | -0.129744327 | 0.00402896  | 6         |
|               | 17 | CAPN2             | 0.118445391  | 0.00169485  | 5         |
|               | 18 | CENPE             | 0.131265933  | 0.011008868 | 5         |
|               | 19 | INTS4             | -0.158658187 | 0.008358259 | 5         |
|               | 20 | SSR1              | 0.144712628  | 0.005279494 | 5         |
| <b>MVP</b>    | 1  | treat             | NA           | NA          | 32        |
|               | 2  | SF1               | 0.128043309  | 0.013012698 | 17        |
|               | 3  | FN1               | -0.0934299   | 0.001075001 | 15        |
|               | 4  | BCL11B            | -0.121818892 | 0.005721118 | 12        |
|               | 5  | CYP19A1           | 0.130082715  | 0.003200021 | 10        |
|               | 6  | DAB2              | 0.165394282  | 0.005797928 | 8         |
|               | 7  | hsa-miR-516a-3p   | 0.304283162  | 0.006707361 | 8         |
|               | 8  | PSMC6             | 0.245589764  | 0.00095251  | 7         |
|               | 9  | hsa-miR-29b-1-5p  | 0.344697039  | 0.007839619 | 6         |
|               | 10 | HSPA5             | -0.434450741 | 0.015932409 | 6         |
|               | 11 | PEG3              | -0.052160228 | 0.076601748 | 5         |
|               | 12 | SNTB1             | -0.11653183  | 0.021764986 | 5         |
| <b>ERO1L</b>  | 1  | treat             | NA           | NA          | 35        |
|               | 2  | hsa-miR-520c-3p   | -0.428494172 | 0.015214611 | 21        |
|               | 3  | hsa-miR-210       | -0.400527299 | 0.00535276  | 17        |
|               | 4  | PCCB              | 0.200887743  | 0.00740574  | 14        |
|               | 5  | HSP90B2P          | 0.258646697  | 0.000752682 | 10        |
|               | 6  | hsa-miR-30a-5p    | 0.78941181   | 0.009469013 | 9         |
|               | 7  | hsa-miR-451a      | -0.199671304 | 0.003239847 | 9         |
|               | 8  | PLIN2             | -0.276890651 | 0.063846009 | 9         |
|               | 9  | hsa-miR-516a-5p   | 1.18803342   | 0.008730779 | 6         |
|               | 10 | hsa-miR-520f      | -0.670239587 | 0.00048786  | 6         |
|               | 11 | JUP               | -0.155207249 | 0.025077776 | 5         |
|               | 12 | WDR87             | 0.114724082  | 0.059796524 | 5         |
| <b>DDX3X</b>  | 1  | NUP62             | -0.214100652 | 0.001432532 | 24        |
|               | 2  | PLIN2             | -0.152604433 | 1.08E-06    | 17        |
|               | 3  | RTN4              | 0.268533692  | 0.007229203 | 17        |
|               | 4  | CAP               | 0.414185979  | 0.000116926 | 15        |
|               | 5  | PCNA              | 0.146849149  | 0.000677374 | 14        |
|               | 6  | RP2               | 0.263826805  | 0.003725067 | 11        |
|               | 7  | RHBDL1            | -0.190022788 | 0.008657437 | 10        |
|               | 8  | AK2               | 0.226688698  | 0.004772103 | 8         |
|               | 9  | cDNA.FLJ33617.fis | -0.148080058 | 0.035460329 | 8         |
|               | 10 | hsa-miR-520c-3p   | 0.535275739  | 0.001107214 | 7         |
|               | 11 | PDCD4             | -0.175124522 | 0.005960906 | 5         |
|               | 12 | YWHAG             | 0.308948259  | 0.017484542 | 5         |

| Transcript     |    | Regulator         | Coef         | p value     | Frequency |
|----------------|----|-------------------|--------------|-------------|-----------|
| <b>PRDX2</b>   | 1  | treat             | NA           | NA          | 35        |
|                | 2  | hsa-miR-423-5p    | -0.610144465 | 0.000974561 | 22        |
|                | 3  | hsa-miR-484       | -0.482896512 | 0.03079483  | 21        |
|                | 4  | BCL11B            | 0.112394938  | 0.035622828 | 15        |
|                | 5  | hsa-miR-30a-5p    | -0.51454322  | 0.039371185 | 11        |
|                | 6  | ARHGAP1           | 0.323878962  | 0.005133937 | 10        |
|                | 7  | hsa-miR-765       | -0.362546118 | 1.62E-05    | 7         |
|                | 8  | hsa-miR-513a-5p   | -0.258202799 | 0.078106707 | 6         |
|                | 9  | GALNT2            | -0.074122283 | 0.075282805 | 5         |
|                | 10 | HNRNPH1           | 0.655477345  | 0.002638396 | 5         |
|                | 11 | hsa-miR-518e-5p   | -0.592270379 | 0.020461495 | 5         |
| <b>SLC26A2</b> | 1  | treat             | NA           | NA          | 35        |
|                | 2  | DDX3X             | 0.249790798  | 0.012284202 | 9         |
|                | 3  | EIF4A1            | 0.68320612   | 0.016421443 | 9         |
|                | 4  | hsa-miR-29b-1-5p  | 0.701267497  | 0.007494958 | 5         |
|                | 5  | PLIN2             | 0.41657057   | 0.045403908 | 5         |
| <b>HDAC2</b>   | 1  | treat             | NA           | NA          | 35        |
|                | 2  | DNM1L             | 0.058735475  | 0.008674958 | 14        |
|                | 3  | COPE              | -0.083179279 | 0.009995742 | 12        |
|                | 4  | hsa-miR-516a-5p   | -0.612405984 | 0.022204252 | 11        |
|                | 5  | CCDC109A          | -0.091952684 | 0.027020238 | 9         |
|                | 6  | cDNA.FLJ33617.fis | -0.064346558 | 0.03901038  | 8         |
|                | 7  | RPL15             | 0.105087576  | 0.000166247 | 8         |
|                | 8  | SERPINC1          | -0.090150121 | 0.015500689 | 7         |
|                | 9  | AKR7A2            | -0.075695912 | 0.00831633  | 6         |
|                | 10 | ACAD9             | -0.051561724 | 0.076570871 | 5         |
|                | 11 | hsa-miR-936       | 0.164944441  | 0.006939736 | 5         |
|                | 12 | SPAG17            | 0.07579108   | 0.012959292 | 5         |
| <b>HSPB1</b>   | 1  | treat             | NA           | NA          | 35        |
|                | 2  | hsa-miR-520c-3p   | 1.19222175   | 0.002187348 | 20        |
|                | 3  | SPINT1            | 0.247832824  | 0.004601156 | 18        |
|                | 4  | hsa-miR-30a-5p    | -1.808504632 | 0.001932845 | 10        |
|                | 5  | hsa-miR-23a-5p    | 1.129700484  | 0.003616775 | 8         |
|                | 6  | TXNRD1            | 0.840884403  | 0.000210944 | 8         |
|                | 7  | NDRG1             | -0.293373492 | 0.00620769  | 7         |
|                | 8  | EGFR              | 0.610645502  | 0.045800047 | 6         |
|                | 9  | EPS8L2            | 0.149271726  | 0.030103576 | 6         |
|                | 10 | HDAC1             | 0.287166152  | 0.027243632 | 6         |
|                | 11 | LMNA              | 0.622295565  | 0.035826275 | 6         |
|                | 12 | HIBCH             | -0.188574117 | 0.00314395  | 5         |
|                | 13 | hsa-miR-520b      | 1.432934745  | 0.008314063 | 5         |
|                | 14 | M6PR              | 0.241618325  | 0.008677556 | 5         |
|                | 15 | UBA2              | 0.169884517  | 0.03718694  | 5         |
| <b>JUP</b>     | 1  | HSPA5             | -0.662234684 | 0.001341621 | 28        |
|                | 2  | TRIM28            | 0.296428801  | 2.34E-05    | 20        |
|                | 3  | ERO1L             | -0.164105558 | 0.000411628 | 17        |
|                | 4  | hsa-miR-520c-3p   | 0.446676878  | 0.010872103 | 14        |
|                | 5  | HSP90AB3P         | 0.800290778  | 1.93E-05    | 10        |
|                | 6  | hsa-miR-936       | 0.270738091  | 0.038202412 | 6         |
|                | 7  | LDHA              | -0.253025894 | 0.00037072  | 6         |
|                | 8  | ATP6V1B1          | 0.169972541  | 0.002090158 | 5         |
|                | 9  | AUTS2             | -0.143682127 | 0.056788432 | 5         |
|                | 10 | G3BP1             | 0.17014745   | 0.005036805 | 5         |
|                | 11 | hsa-miR-520f      | 0.457827734  | 0.001938249 | 5         |
| <b>SMS</b>     | 1  | CALU              | -0.199323401 | 0.006297874 | 26        |
|                | 2  | hsa-miR-29b-1-5p  | -0.41410781  | 0.000398676 | 18        |
|                | 3  | LMNB1             | -0.31560583  | 0.004140867 | 16        |
|                | 4  | CBX2              | 0.2088564    | 0.004897722 | 12        |
|                | 5  | HDAC2             | -0.157520258 | 0.006697803 | 7         |
|                | 6  | HIST1H1B          | 0.205136922  | 0.028655419 | 6         |
|                | 7  | MYO15A            | -0.196436332 | 0.019015553 | 6         |

| Transcript    |    | Regulator        | Coef         | p value     | Frequency |
|---------------|----|------------------|--------------|-------------|-----------|
| <b>ETFDH</b>  | 1  | TMEM109          | 0.135383428  | 0.002396943 | 26        |
|               | 2  | RASA1            | 0.390561879  | 5.85E-07    | 13        |
|               | 3  | treat            | NA           | NA          | 11        |
|               | 4  | NUP93            | 0.136857015  | 0.004009673 | 10        |
|               | 5  | ALDOA            | -0.455685378 | 0.000187965 | 9         |
|               | 6  | CD1A             | 0.109047926  | 0.023880891 | 8         |
|               | 7  | RBM47            | 0.127233956  | 0.006759666 | 6         |
|               | 8  | AKAP13           | 0.132427756  | 0.008145965 | 5         |
|               | 9  | GMPS             | 0.128254702  | 0.011795479 | 5         |
|               | 10 | HSP90B1          | -0.402878845 | 9.04E-06    | 5         |
|               | 11 | HYOU1            | -0.16713191  | 0.000210343 | 5         |
| <b>TXNRD1</b> | 1  | treat            | NA           | NA          | 35        |
|               | 2  | hsa-miR-210      | -0.473617123 | 0.000811072 | 21        |
|               | 3  | ATP5A1           | 0.640864093  | 0.042103681 | 13        |
|               | 4  | HMGA1            | 0.155514555  | 0.000127634 | 9         |
|               | 5  | TM9SF4           | 0.219199586  | 0.001100275 | 8         |
|               | 6  | UBE2N            | 0.242779687  | 0.008586723 | 8         |
|               | 7  | GARS             | -0.169412279 | 0.008022145 | 7         |
|               | 8  | HMOX1            | 0.107958653  | 0.004123516 | 7         |
|               | 9  | hsa-miR-365a-3p  | -0.545837998 | 0.002077529 | 7         |
|               | 10 | HK2              | -0.121425481 | 0.020348557 | 6         |
|               | 11 | hsa-miR-224-5p   | 0.525253829  | 0.003424663 | 5         |
|               | 12 | HSP90AB1         | 0.271591949  | 0.015331456 | 5         |
| <b>HMOX1</b>  | 1  | hsa-miR-622      | 0.446698577  | 0.000646128 | 18        |
|               | 2  | treat            | NA           | NA          | 13        |
|               | 3  | hsa-miR-210      | -0.488063099 | 2.87E-06    | 11        |
|               | 4  | ETF1             | 0.259689232  | 0.001875449 | 9         |
|               | 5  | hsa-miR-186-5p   | -0.650776839 | 0.00946294  | 9         |
|               | 6  | PSMD3            | 0.836733455  | 0.001729684 | 8         |
|               | 7  | FN1              | -0.183100212 | 0.00197009  | 6         |
|               | 8  | SOD1             | 0.234128471  | 0.03167573  | 6         |
|               | 9  | MPP1             | 0.262052784  | 0.0006189   | 5         |
| <b>PDCD4</b>  | 1  | treat            | NA           | NA          | 34        |
|               | 2  | PON2             | -0.24410777  | 0.000176441 | 29        |
|               | 3  | MYLK             | 0.14234965   | 0.031513611 | 18        |
|               | 4  | ANXA11           | -0.288233725 | 0.00708159  | 8         |
|               | 5  | HSPA6            | 0.183022031  | 0.003666425 | 7         |
|               | 6  | VTN              | -0.203887241 | 0.002859198 | 6         |
|               | 7  | ACSL3            | -0.129454029 | 0.051051511 | 5         |
|               | 8  | HYOU1            | -0.12402079  | 0.08875632  | 5         |
| <b>GNS</b>    | 1  | treat            | NA           | NA          | 31        |
|               | 2  | hsa-miR-519b-3p  | -0.594391554 | 0.001294295 | 24        |
|               | 3  | FN1              | 0.082746094  | 0.004328338 | 11        |
|               | 4  | ATP5A1           | -0.477457723 | 0.004400721 | 10        |
|               | 5  | CSDA             | -0.122487724 | 0.001661029 | 10        |
|               | 6  | HNRNPA3          | -0.087147267 | 0.015134765 | 10        |
|               | 7  | RTN4             | -0.136382348 | 0.03072082  | 8         |
|               | 8  | hsa-miR-17-5p    | -0.631226407 | 0.000368272 | 7         |
|               | 9  | HBB              | 0.132361503  | 0.001476269 | 5         |
| <b>TES</b>    | 1  | hsa-miR-29b-1-5p | -0.33203703  | 0.00021879  | 19        |
|               | 2  | EGFR             | -0.509877069 | 0.00149395  | 16        |
|               | 3  | TXNRD1           | -0.207089826 | 0.000809936 | 16        |
|               | 4  | hsa-miR-574-3p   | 0.193493549  | 0.003072657 | 15        |
|               | 5  | LMNA             | -0.342987731 | 0.006618406 | 13        |
|               | 6  | SNX2             | -0.175354254 | 0.025604038 | 11        |
|               | 7  | EIF3A            | -0.320252228 | 0.00018524  | 9         |
|               | 8  | GBP1             | -0.151130849 | 0.002281851 | 9         |
|               | 9  | HIBCH            | 0.117673772  | 0.006076335 | 8         |
|               | 10 | ALPP             | -0.119686919 | 0.001234166 | 6         |
|               | 11 | hsa-miR-125a-5p  | -0.360942839 | 0.00583041  | 5         |
|               | 12 | treat            | NA           | NA          | 5         |

| Transcript     |    | Regulator       | Coef         | p value     | Frequency |
|----------------|----|-----------------|--------------|-------------|-----------|
| <b>CYP11A1</b> | 1  | treat           | NA           | NA          | 35        |
|                | 2  | EPS8L2          | 0.222463627  | 0.001409013 | 23        |
|                | 3  | PLIN2           | 0.525256625  | 0.023515407 | 14        |
|                | 4  | SRP72           | 0.232351754  | 0.007895791 | 10        |
|                | 5  | HSPA4           | 0.691396894  | 0.000145318 | 8         |
|                | 6  | RASA1           | 0.474482027  | 0.006416773 | 6         |
|                | 7  | hsa-miR-371a-3p | 0.598675522  | 0.003037481 | 5         |
| <b>ALPP</b>    | 1  | treat           | NA           | NA          | 28        |
|                | 2  | hsa-miR-1249    | -0.666325456 | 0.012428561 | 15        |
|                | 3  | MAPK1           | 0.168026191  | 0.068710702 | 9         |
|                | 4  | JUNB            | 0.257124841  | 0.024509954 | 8         |
|                | 5  | ERAP1           | 0.417485017  | 0.000830132 | 7         |
|                | 6  | hsa-miR-877-5p  | 0.514545727  | 0.000565534 | 7         |
|                | 7  | hsa-miR-518e-5p | 1.802731756  | 0.000104309 | 5         |
| <b>SLC7A5</b>  | 1  | treat           | NA           | NA          | 30        |
|                | 2  | MCM4            | 0.105491842  | 0.038889673 | 15        |
|                | 3  | CYCS            | -0.149390593 | 0.007217993 | 14        |
|                | 4  | HBB             | -0.136905583 | 0.007300326 | 14        |
|                | 5  | hsa-miR-149-5p  | 0.3777459    | 0.002622374 | 11        |
|                | 6  | hsa-miR-27b-3p  | 1.147205276  | 0.016693139 | 10        |
|                | 7  | hsa-miR-221-3p  | 0.49600699   | 0.001283059 | 8         |
|                | 8  | PDIA6           | -0.703508778 | 0.002923769 | 7         |
|                | 9  | EIF4A1          | 0.412771656  | 0.011899114 | 6         |
|                | 10 | hsa-miR-1202    | 0.168653486  | 0.017442542 | 5         |
|                | 11 | LMNA            | 0.389043049  | 0.00268523  | 5         |
| <b>FN1</b>     | 1  | treat           | NA           | NA          | 34        |
|                | 2  | hsa-miR-345-5p  | -0.828634157 | 0.00027412  | 21        |
|                | 3  | cDNA.FLJ55918   | -0.198206938 | 0.013754116 | 17        |
|                | 4  | HSPA9           | -0.802471937 | 0.00041362  | 14        |
|                | 5  | hsa-miR-30a-5p  | 0.886889813  | 0.017134796 | 12        |
|                | 6  | hsa-miR-575     | -0.489066178 | 0.000128317 | 8         |
|                | 7  | EML5            | 0.181513115  | 0.040987614 | 6         |
|                | 8  | hsa-miR-524-3p  | 1.30392626   | 0.023093978 | 6         |
|                | 9  | DEK             | -0.208956514 | 0.004634389 | 5         |
|                | 10 | hsa-miR-518d-3p | 0.421356113  | 0.081367856 | 5         |
|                | 11 | hsa-miR-572     | -0.655163361 | 9.45E-06    | 5         |
| <b>FTH1</b>    | 1  | PDXDC1          | -0.128868302 | 0.000179016 | 25        |
|                | 2  | hsa-miR-130b-3p | 0.232913429  | 0.001462488 | 22        |
|                | 3  | hsa-miR-524-3p  | 0.650940826  | 9.49E-05    | 13        |
|                | 4  | hsa-miR-424-3p  | -0.324823899 | 0.00016448  | 11        |
|                | 5  | hsa-miR-423-5p  | 0.411060846  | 0.000161793 | 9         |
|                | 6  | hsa-miR-523-3p  | -0.288074124 | 0.000214593 | 7         |
|                | 7  | RAB1B           | -0.078583539 | 0.006432884 | 6         |
|                | 8  | hsa-miR-518d-3p | 0.353097159  | 0.001819607 | 5         |
|                | 9  | LGALS3BP        | 0.100068078  | 0.019330671 | 5         |
|                | 10 | SYNGR2          | 0.102396452  | 0.003023531 | 5         |
| <b>HSD3B1</b>  | 1  | treat           | NA           | NA          | 35        |
|                | 2  | hsa-miR-141-3p  | -1.463565808 | 0.006584373 | 16        |
|                | 3  | DDX3X           | 0.308187527  | 0.016780789 | 10        |
|                | 4  | hsa-miR-1249    | -0.639952084 | 0.054267949 | 6         |
|                | 5  | hsa-miR-24-3p   | 2.319732363  | 0.012049521 | 5         |
|                | 6  | SLC25A6         | 0.470225209  | 0.053700353 | 5         |
| <b>MX1</b>     | 1  | treat           | NA           | NA          | 35        |
|                | 2  | hsa-miR-30a-5p  | 3.183298676  | 0.004111611 | 12        |
|                | 3  | hsa-miR-503     | -1.06350739  | 0.000339466 | 9         |
|                | 4  | HNRNPC          | 0.417544717  | 0.053181932 | 8         |
|                | 5  | hsa-miR-30d-5p  | 3.366756959  | 3.64E-05    | 8         |
|                | 6  | hsa-miR-224-5p  | 1.147993397  | 0.064727179 | 7         |
|                | 7  | GNPDA1          | -0.323892153 | 0.084058469 | 5         |
|                | 8  | hsa-miR-664-3p  | 1.373489876  | 0.00085164  | 5         |
|                | 9  | KIF5B           | 0.333760252  | 0.006892938 | 5         |

| Transcript     |    | Regulator       | Coef         | p value     | Frequency |
|----------------|----|-----------------|--------------|-------------|-----------|
| <b>WARS</b>    | 1  | treat           | NA           | NA          | 28        |
|                | 2  | hsa-miR-23a-5p  | -1.246769032 | 0.005251291 | 20        |
|                | 3  | hsa-miR-520c-3p | -0.781952957 | 0.009287224 | 18        |
|                | 4  | RBM15B          | -0.378847964 | 0.001003567 | 14        |
|                | 5  | NDRG1           | 0.241793332  | 0.056115667 | 13        |
|                | 6  | EPS8L2          | -0.159073305 | 0.024279662 | 10        |
|                | 7  | HSP90B2P        | 0.400833746  | 0.008160342 | 9         |
|                | 8  | AP2A1           | -0.73455242  | 0.002460028 | 6         |
|                | 9  | EIF3A           | -0.478778086 | 0.004005548 | 6         |
|                | 10 | hsa-miR-516a-5p | 2.770173324  | 0.001040959 | 5         |
| <b>CTSB</b>    | 1  | CLINT1          | -0.268227445 | 2.61E-05    | 29        |
|                | 2  | NADH4           | -0.208530014 | 0.000236952 | 17        |
|                | 3  | MGA             | -0.255729363 | 0.000673547 | 14        |
|                | 4  | MROH2A          | -0.157003697 | 0.010872142 | 11        |
|                | 5  | KIAA1632        | -0.136339712 | 0.016701308 | 9         |
|                | 6  | SLC25A3         | -0.491304068 | 0.000967033 | 9         |
|                | 7  | AFP             | -0.168006731 | 0.001719096 | 8         |
|                | 8  | CAPN1           | 0.273322119  | 0.012930539 | 8         |
|                | 9  | KIAA1109        | -0.171876279 | 0.004040876 | 6         |
|                | 10 | SSB             | 0.300815201  | 0.001539627 | 6         |
|                | 11 | LAP3            | -0.116771895 | 0.026763422 | 5         |
| <b>CYP19A1</b> | 1  | treat           | NA           | NA          | 35        |
|                | 2  | SLC26A2         | 0.516194078  | 0.004426267 | 15        |
|                | 3  | LCP1            | -0.426063353 | 0.002216689 | 12        |
|                | 4  | YWHAG           | 0.577472061  | 0.006149776 | 9         |
|                | 5  | ERO1L           | 0.282118259  | 0.013202949 | 6         |
|                | 6  | hsa-miR-29c-3p  | -1.428515581 | 0.017263437 | 5         |
| <b>CLIP1</b>   | 1  | treat           | NA           | NA          | 33        |
|                | 2  | HSP90B1         | -0.354592532 | 0.001378079 | 19        |
|                | 3  | PLIN2           | 0.195407561  | 0.009938748 | 14        |
|                | 4  | EIF4A1          | 0.323528119  | 0.012275737 | 13        |
|                | 5  | ATP5O           | 0.099558219  | 0.001632121 | 10        |
|                | 6  | SLC25A6         | 0.288512387  | 0.00139851  | 10        |
|                | 7  | DFNA5           | 0.129661631  | 0.00214938  | 7         |
|                | 8  | GNAQ            | 0.129199339  | 0.00155141  | 7         |
|                | 9  | hsa-miR-30b-3p  | 0.24734614   | 0.024705033 | 5         |
|                | 10 | LCP1            | -0.08970833  | 0.033941056 | 5         |
| <b>PKP2</b>    | 1  | treat           | NA           | NA          | 35        |
|                | 2  | CYP19A1         | -0.180164545 | 0.002952302 | 18        |
|                | 3  | hsa-miR-483-3p  | 0.519780615  | 0.014366428 | 16        |
|                | 4  | PCCB            | 0.225606062  | 0.013422772 | 14        |
|                | 5  | SEC23A          | -0.118764813 | 0.068728256 | 9         |
|                | 6  | PDS5A           | -0.141399505 | 0.025958861 | 6         |
| <b>CAPN6</b>   | 1  | HSPA5           | -1.46072043  | 5.80E-06    | 20        |
|                | 2  | HSPA4           | 0.748717109  | 0.00433449  | 13        |
|                | 3  | SRP72           | 0.415626427  | 0.007369661 | 11        |
|                | 4  | hsa-miR-516a-3p | 1.24789168   | 0.000308408 | 10        |
|                | 5  | EPS8L2          | 0.309643781  | 0.000457198 | 7         |
|                | 6  | EML2            | 0.378183025  | 0.001480636 | 6         |
|                | 7  | AP2A1           | 0.628860257  | 0.007183469 | 5         |
|                | 8  | CLIC3           | 0.383373358  | 8.49E-06    | 5         |
| <b>CTSL1</b>   | 1  | RPL7A           | 0.245374904  | 0.001965598 | 26        |
|                | 2  | SLC7A5          | 0.276294904  | 0.000125911 | 23        |
|                | 3  | RPS27A          | -0.192522444 | 0.050492056 | 10        |
|                | 4  | CYP11A1         | 0.212878248  | 8.95E-09    | 8         |
|                | 5  | hsa-miR-372     | 0.28178393   | 0.000341186 | 7         |
|                | 6  | DAB2            | 0.192819266  | 1.17E-05    | 6         |
|                | 7  | TFRC            | 0.470686118  | 0.000865538 | 6         |

| Transcript    |    | Regulator       | Coef         | p value     | Frequency |
|---------------|----|-----------------|--------------|-------------|-----------|
| <b>CD63</b>   | 1  | treat           | NA           | NA          | 35        |
|               | 2  | LAMB4           | 0.185976938  | 0.000313027 | 19        |
|               | 3  | EIF4G2          | 0.094162365  | 0.013658187 | 16        |
|               | 4  | GSS             | -0.10700955  | 0.011507687 | 12        |
|               | 5  | hsa-miR-224-5p  | 0.352857829  | 0.034784404 | 8         |
|               | 6  | hsa-miR-141-3p  | -0.795862438 | 4.42E-05    | 6         |
|               | 7  | hsa-miR-484     | -0.589220929 | 0.006478649 | 6         |
|               | 8  | IRS2            | 0.065687266  | 0.026829338 | 6         |
| <b>STAT1</b>  | 1  | treat           | NA           | NA          | 35        |
|               | 2  | hsa-miR-877-5p  | 0.421084943  | 0.001505402 | 10        |
|               | 3  | HMOX1           | 0.132877582  | 0.046931837 | 8         |
|               | 4  | hsa-miR-887     | 0.739938449  | 0.000142511 | 6         |
|               | 5  | PCNA            | 0.287116037  | 0.007948536 | 6         |
|               | 6  | PDIA4           | -0.455985983 | 0.014016788 | 6         |
| <b>DAB2</b>   | 1  | treat           | NA           | NA          | 31        |
|               | 2  | hsa-miR-520f    | 0.742632867  | 0.002407225 | 30        |
|               | 3  | EGFR            | 0.877373347  | 0.001512644 | 26        |
| <b>NDRG1</b>  | 1  | treat           | NA           | NA          | 35        |
|               | 2  | PCBP1           | -0.205870212 | 0.009840714 | 12        |
|               | 3  | cDNA.FLJ54153   | -0.163680137 | 0.024138803 | 11        |
|               | 4  | HSD3B1          | -0.136727928 | 0.032325922 | 6         |
| <b>PLIN2</b>  | 1  | treat           | NA           | NA          | 34        |
|               | 2  | CTNND1          | -0.380550788 | 0.017870263 | 27        |
|               | 3  | CD180           | -0.170069628 | 0.019180942 | 14        |
|               | 4  | hsa-miR-564     | 0.3881301    | 0.003696665 | 14        |
|               | 5  | GALNT2          | 0.166399649  | 0.007816986 | 11        |
|               | 6  | TPP2            | 0.111465555  | 0.019149622 | 9         |
|               | 7  | hsa-miR-519c-3p | 1.08234356   | 0.016016674 | 6         |
|               | 8  | hsa-miR-663a    | 0.207251819  | 0.023851959 | 6         |
|               | 9  | GPI             | -0.385242471 | 0.036306996 | 5         |
|               | 10 | hsa-miR-671-5p  | 0.278289537  | 0.043294034 | 5         |
| <b>GDF15</b>  | 1  | treat           | NA           | NA          | 35        |
|               | 2  | hsa-miR-193b-5p | -0.717108263 | 0.002766301 | 30        |
|               | 3  | HNRNPC          | 0.18555061   | 0.017054156 | 19        |
|               | 4  | IGF2BP3         | 0.138984184  | 0.046527439 | 15        |
|               | 5  | hsa-miR-365a-3p | -0.506327953 | 0.008028915 | 11        |
|               | 6  | DAB2            | 0.168548348  | 0.00677274  | 8         |
|               | 7  | FAM115C         | -0.139416536 | 0.010236875 | 8         |
|               | 8  | GPI             | -0.554266505 | 0.014884484 | 8         |
|               | 9  | hsa-miR-193b-3p | -0.63940874  | 0.001037938 | 8         |
|               | 10 | hsa-miR-224-5p  | 0.638239815  | 0.001867444 | 8         |
|               | 11 | hsa-miR-372     | 0.184325959  | 0.036400087 | 6         |
|               | 12 | DSP             | -0.196740395 | 0.000396466 | 5         |
|               | 13 | TM9SF2          | 0.117664439  | 0.019884929 | 5         |
| <b>EPS8L2</b> | 1  | treat           | NA           | NA          | 32        |
|               | 2  | ARPC1B          | -0.217389147 | 0.0024312   | 11        |
|               | 3  | RAB1B           | -0.161778511 | 0.010082809 | 8         |
|               | 4  | hsa-miR-141-3p  | -0.739413928 | 0.01271383  | 6         |
|               | 5  | 11-Sep          | -0.147845877 | 0.024823025 | 6         |
|               | 6  | GSS             | -0.176941428 | 0.002819122 | 5         |
|               | 7  | SFPQ            | 0.630121712  | 0.006517264 | 5         |
